# Supplementary material
Source: PubMed Central journal article supplement (PMC7749828)
Supplement: NIHMS1645895-supplement-Figures_including_Supplemental.pdf [file NIHMS1645895-supplement-Figures_including_Supplemental.pdf]

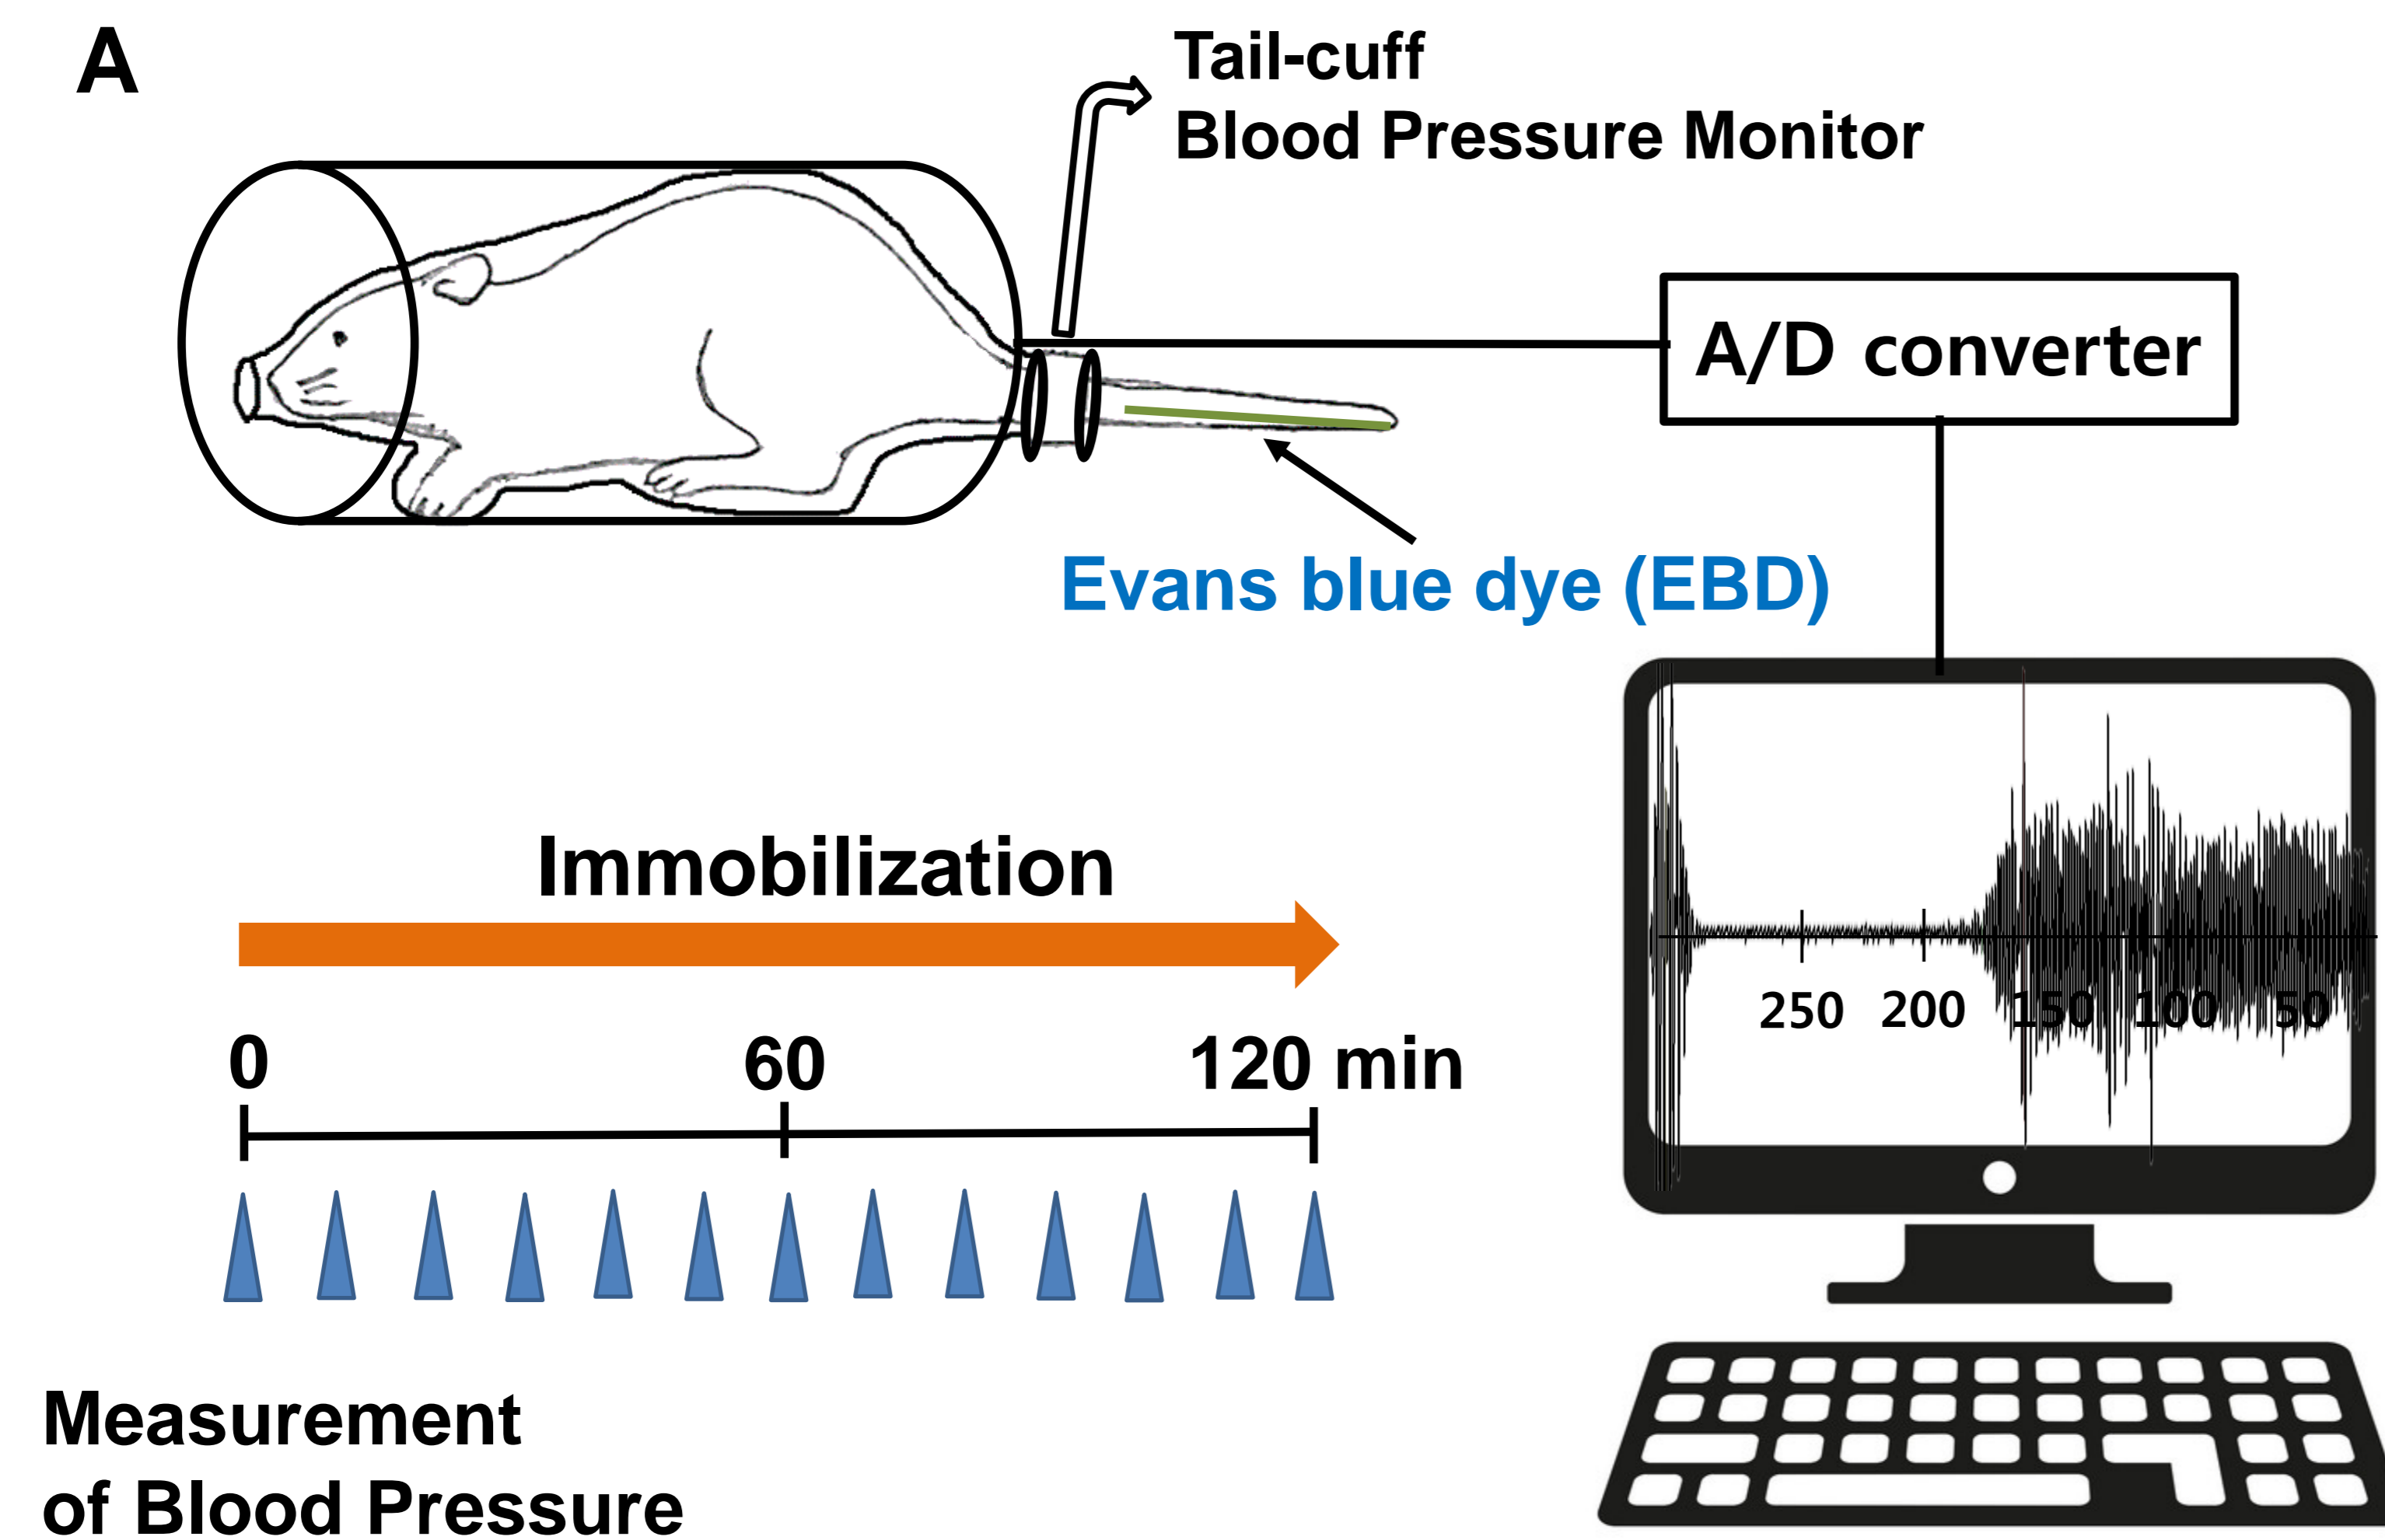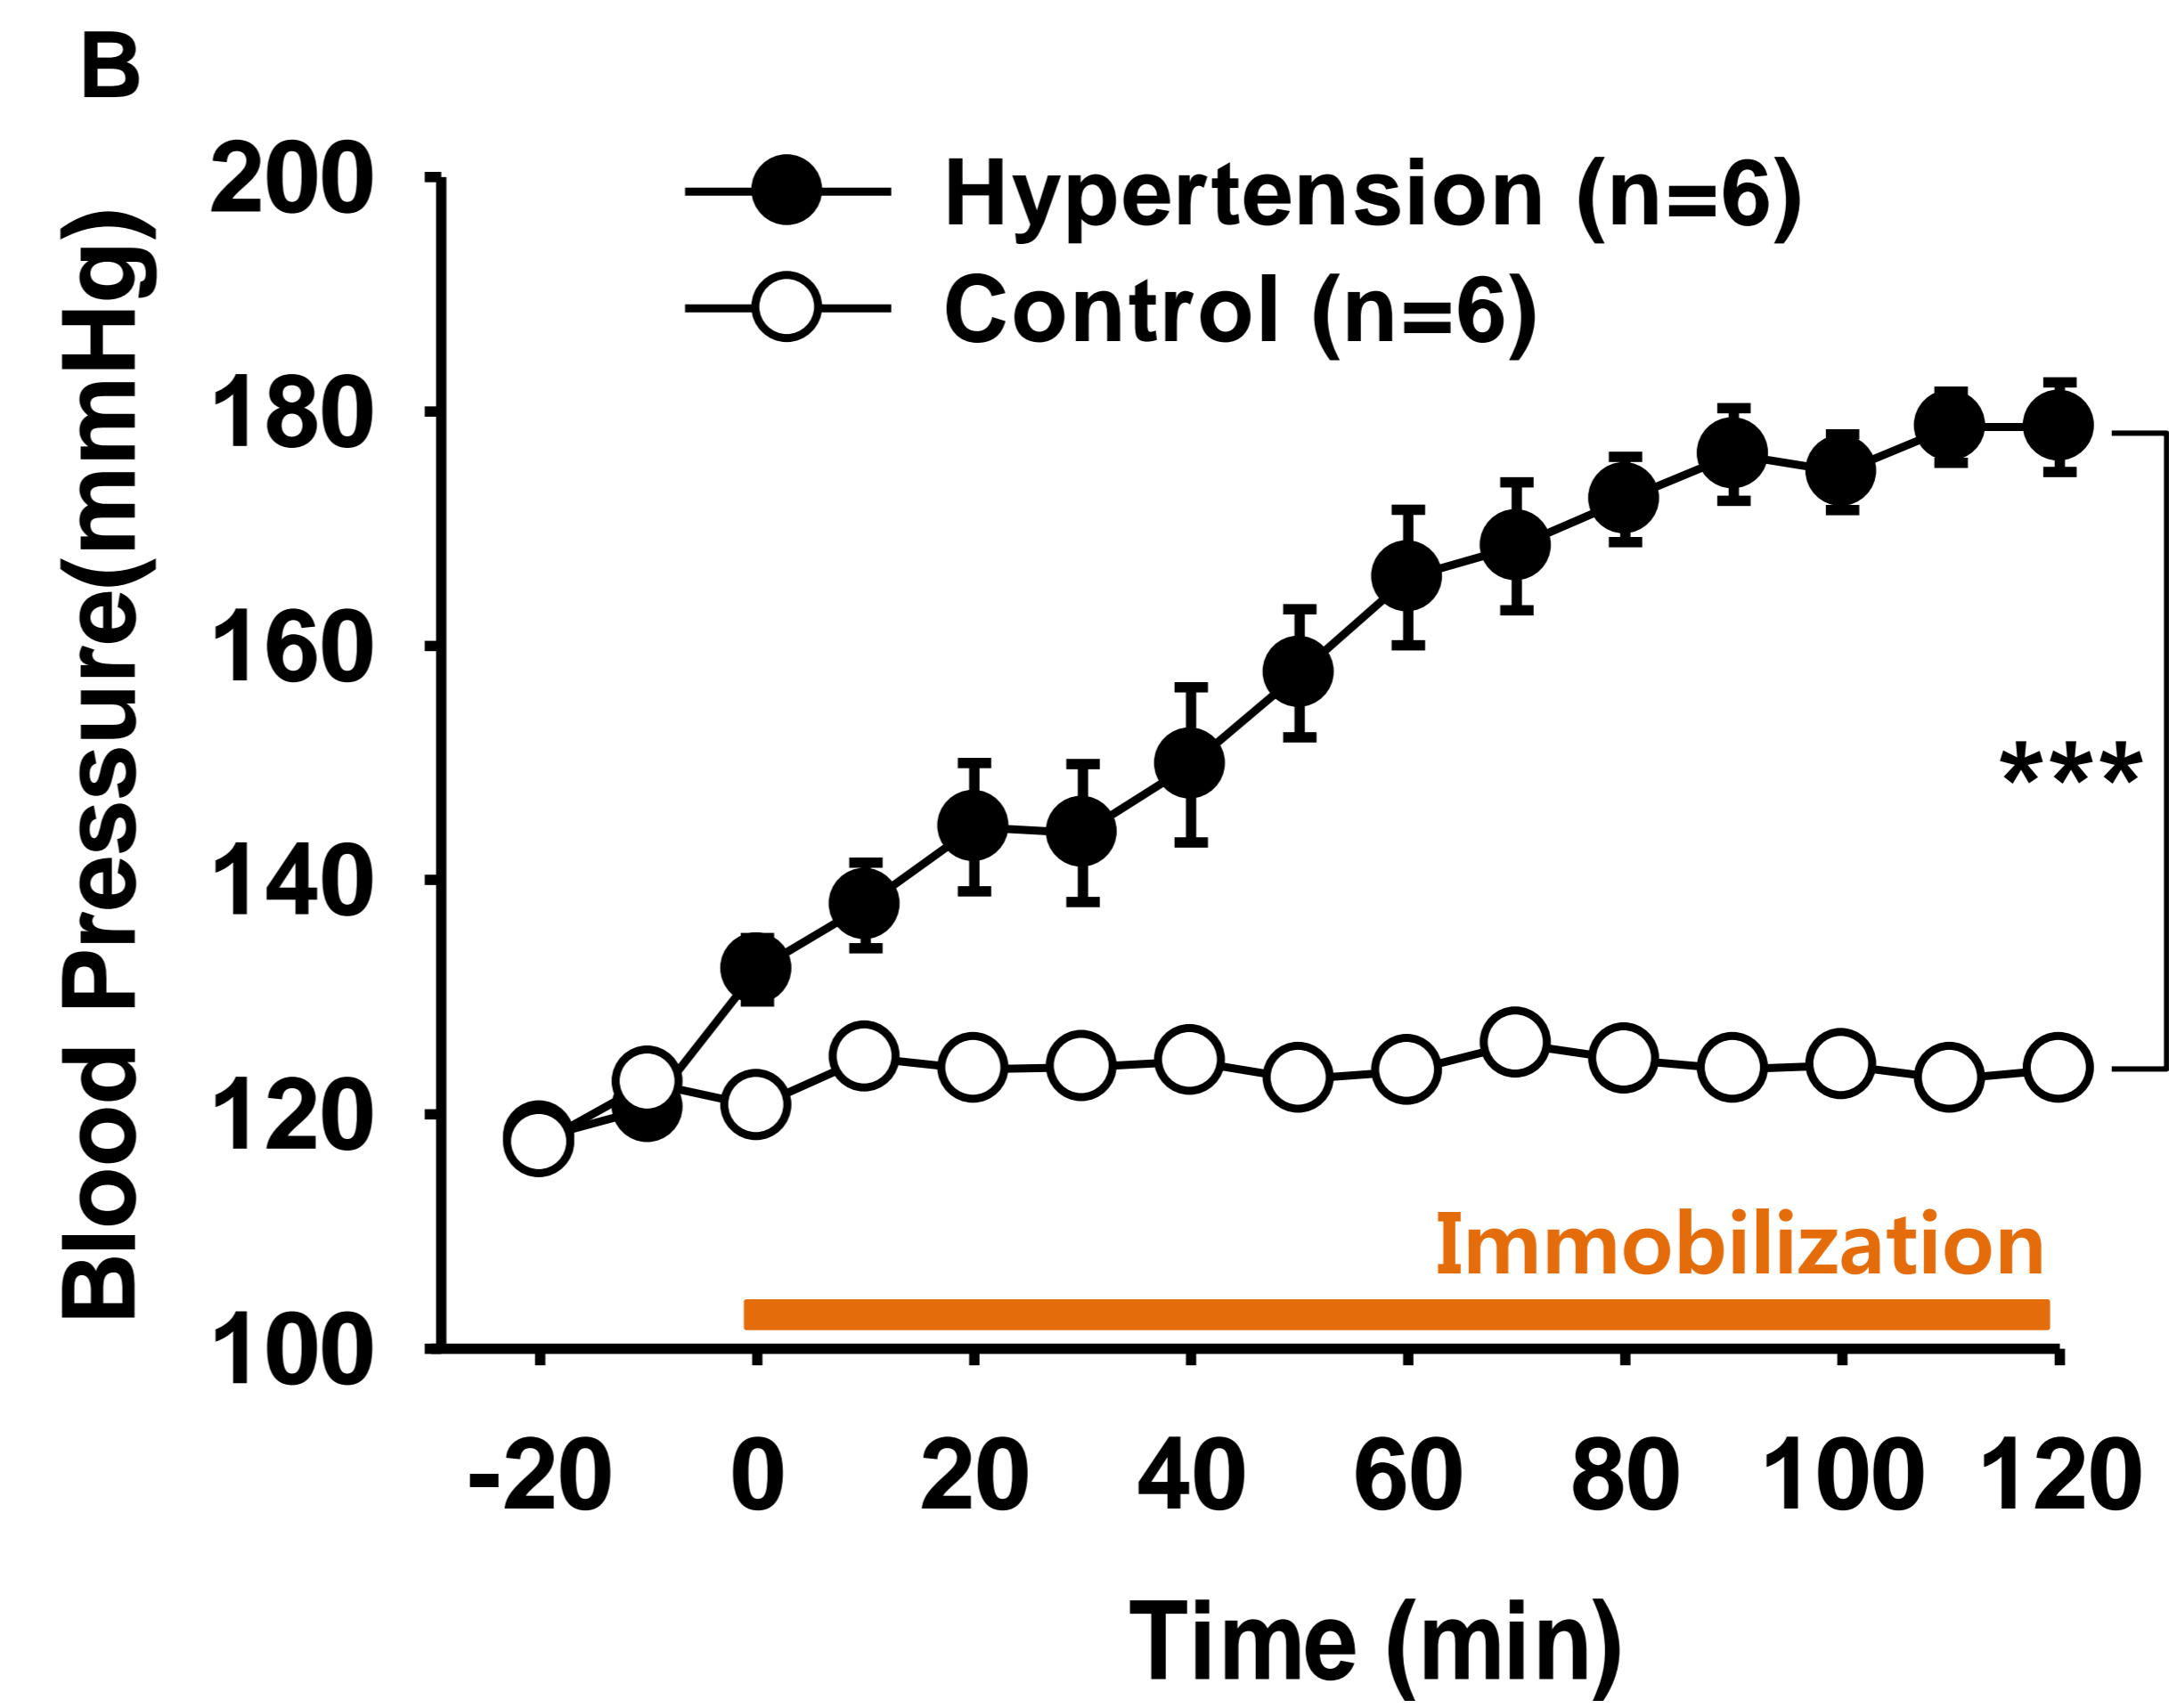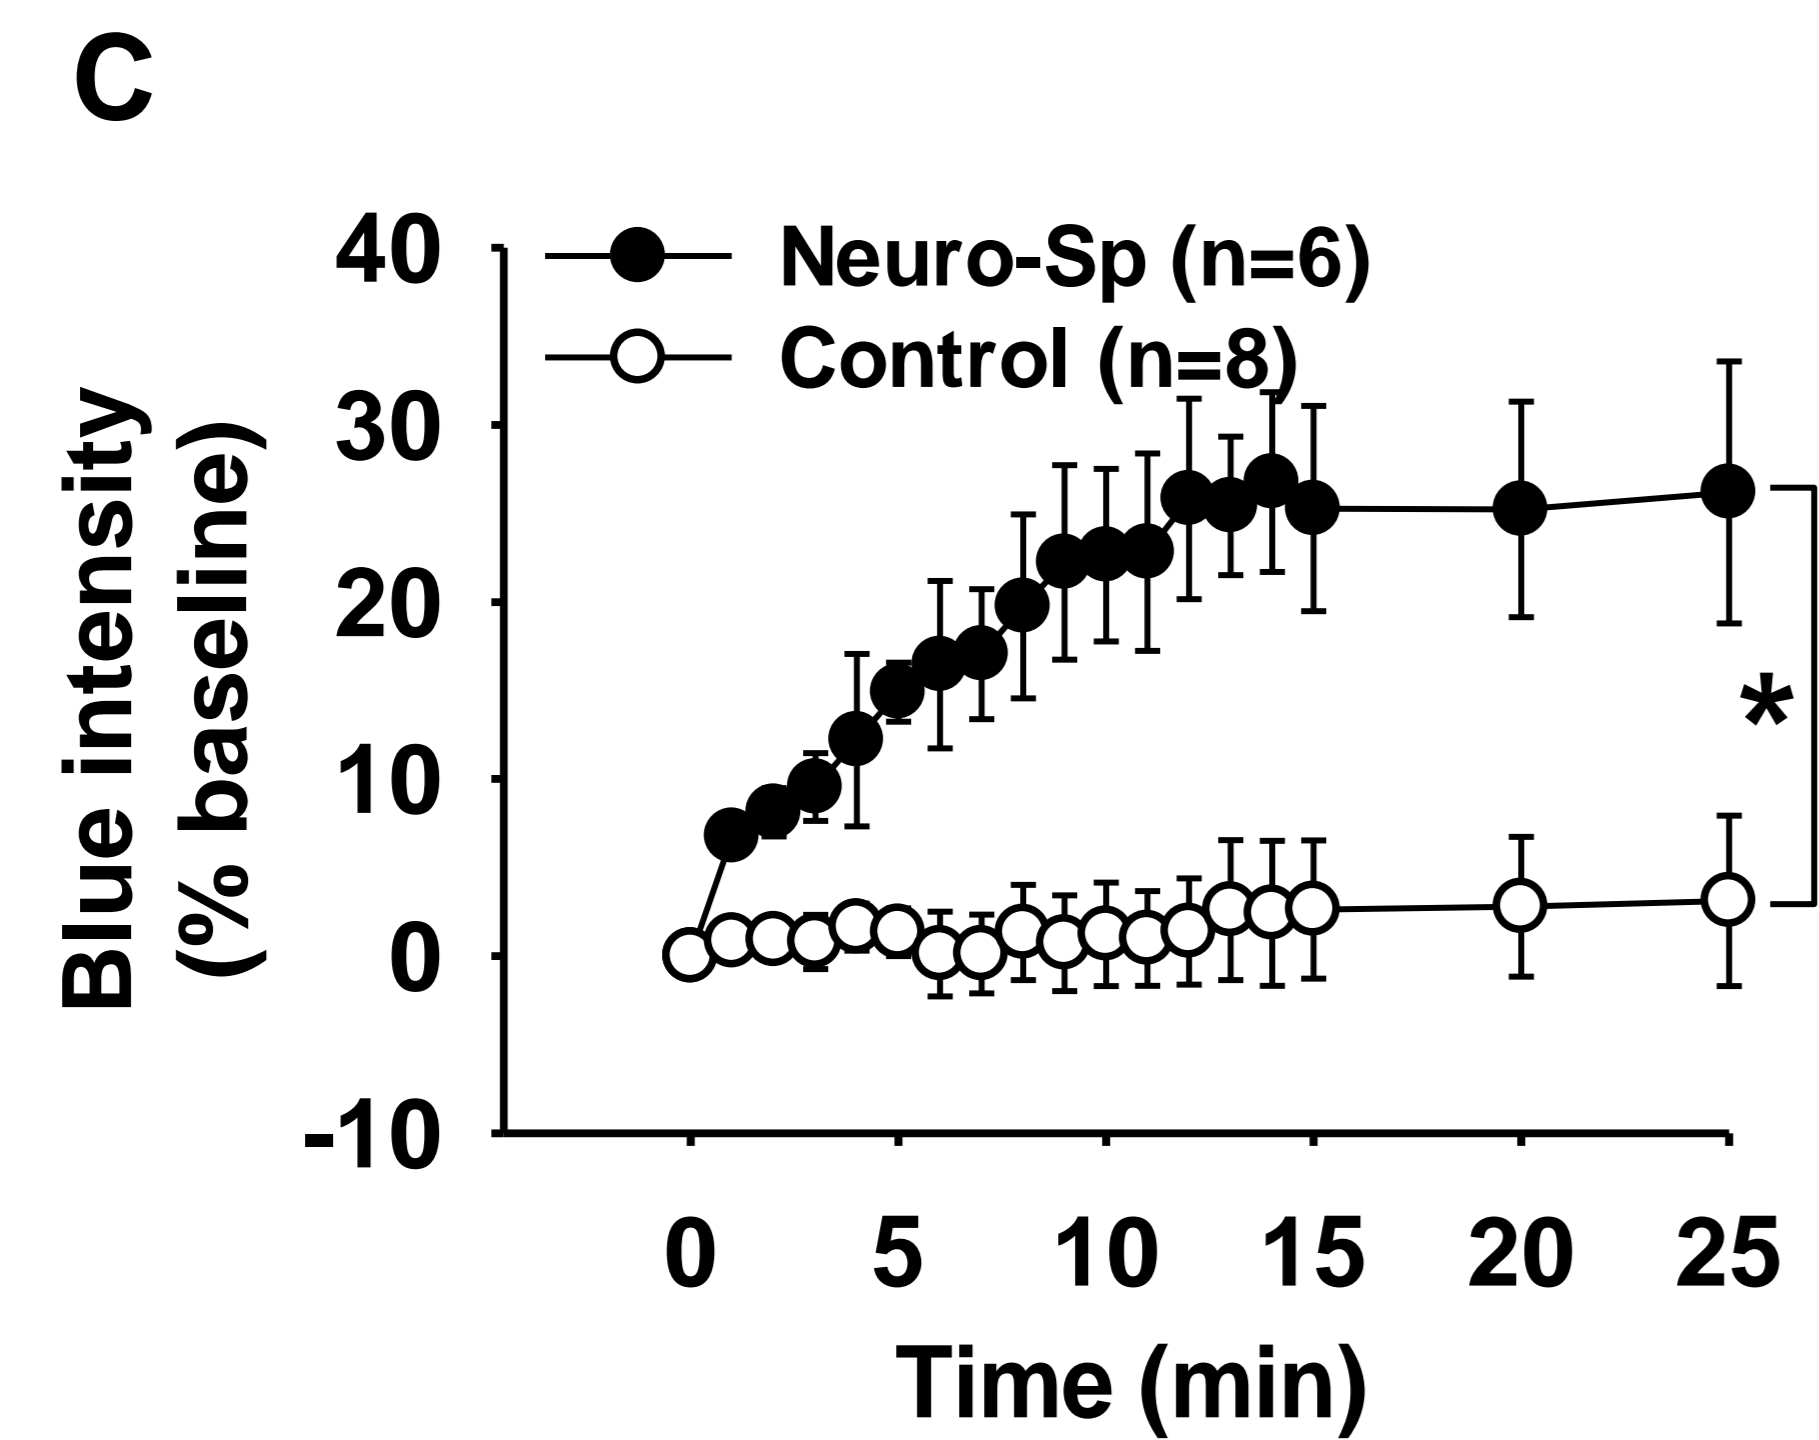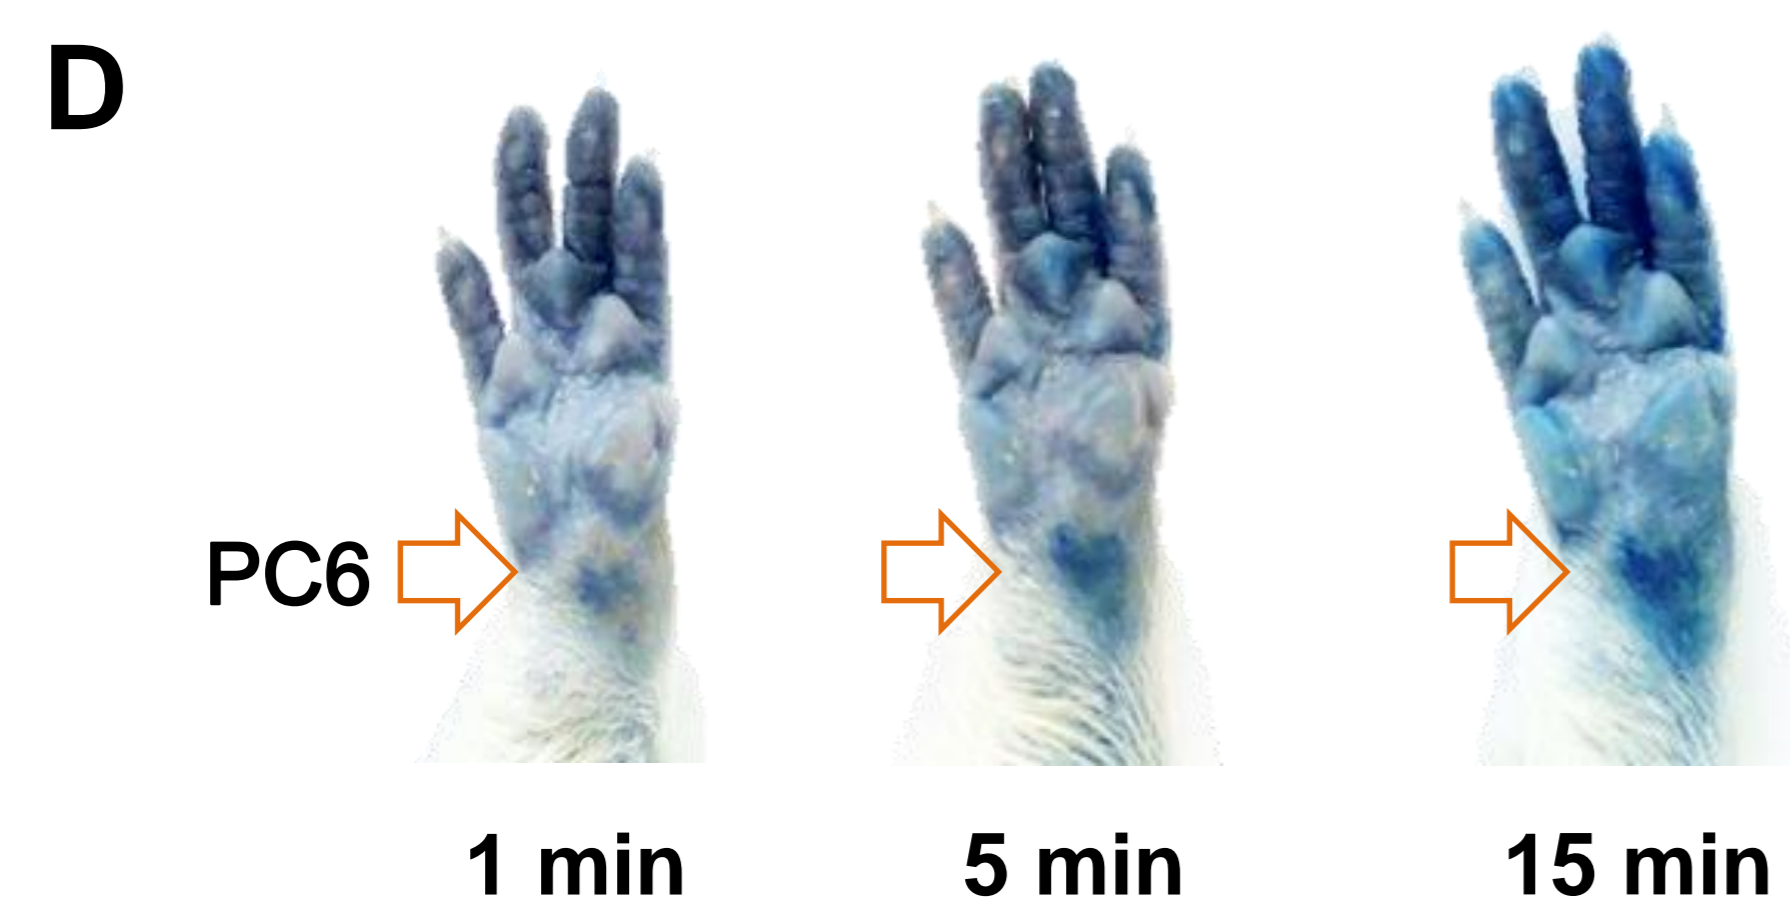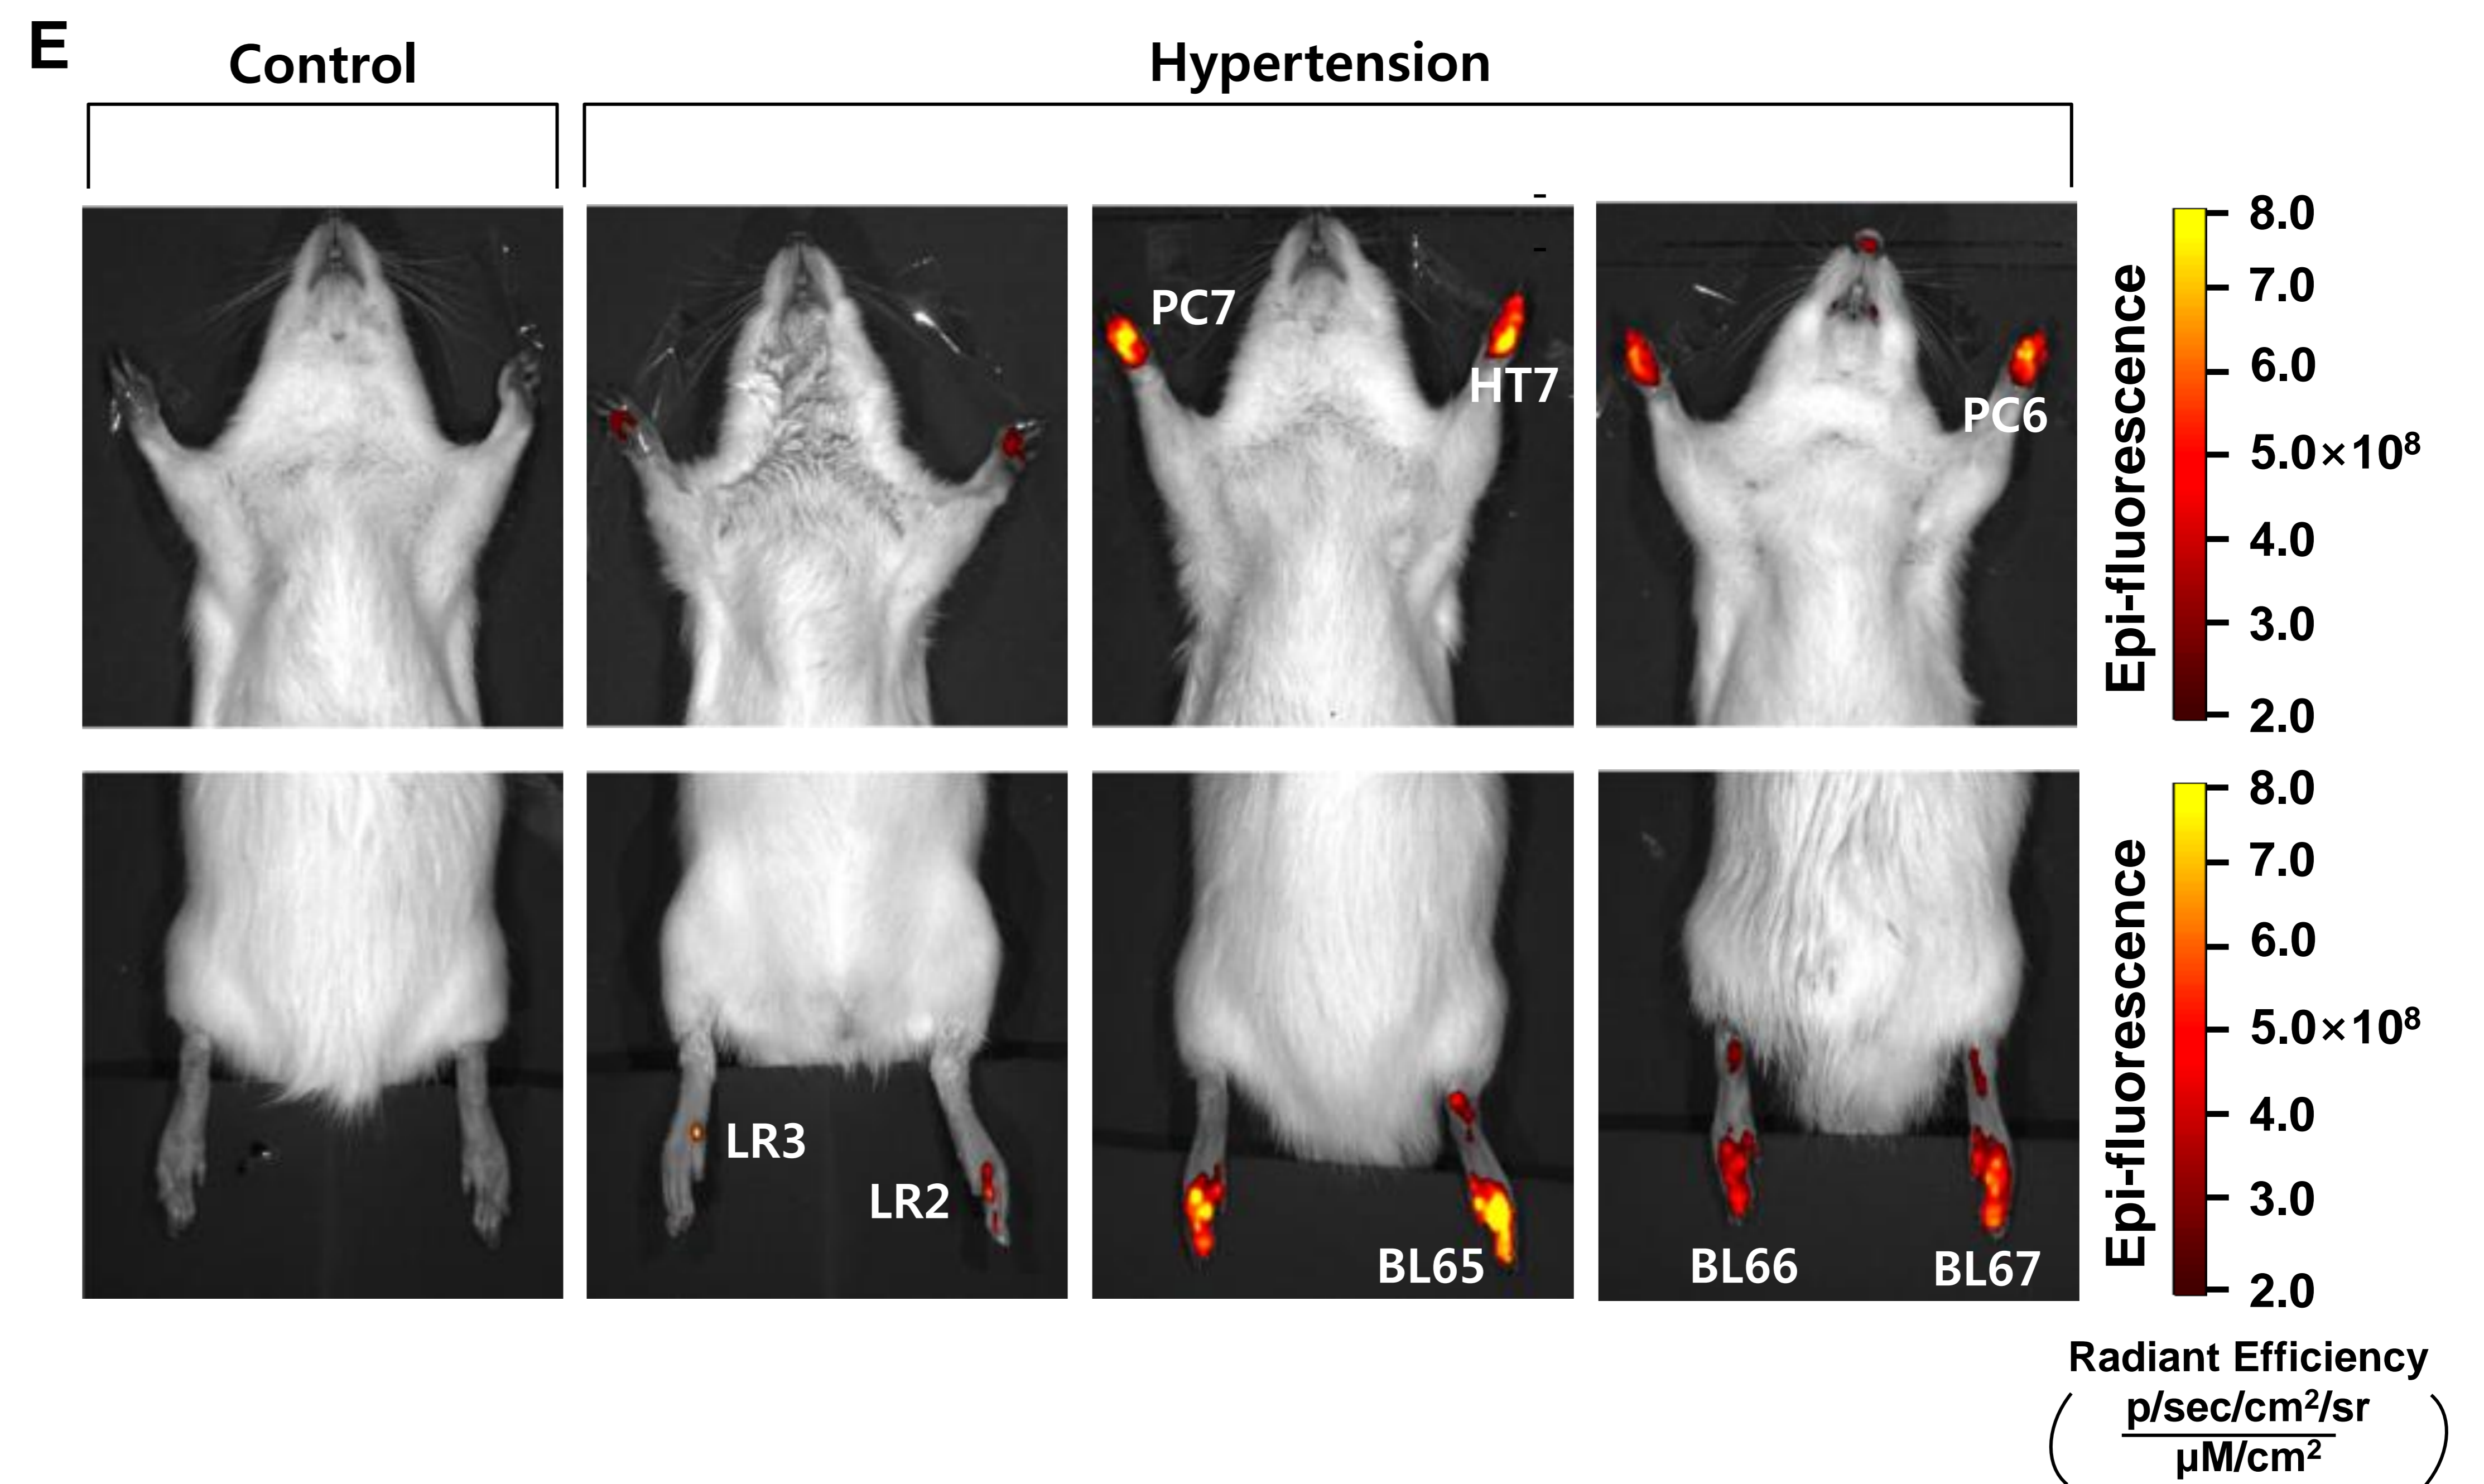

**Fig.1**

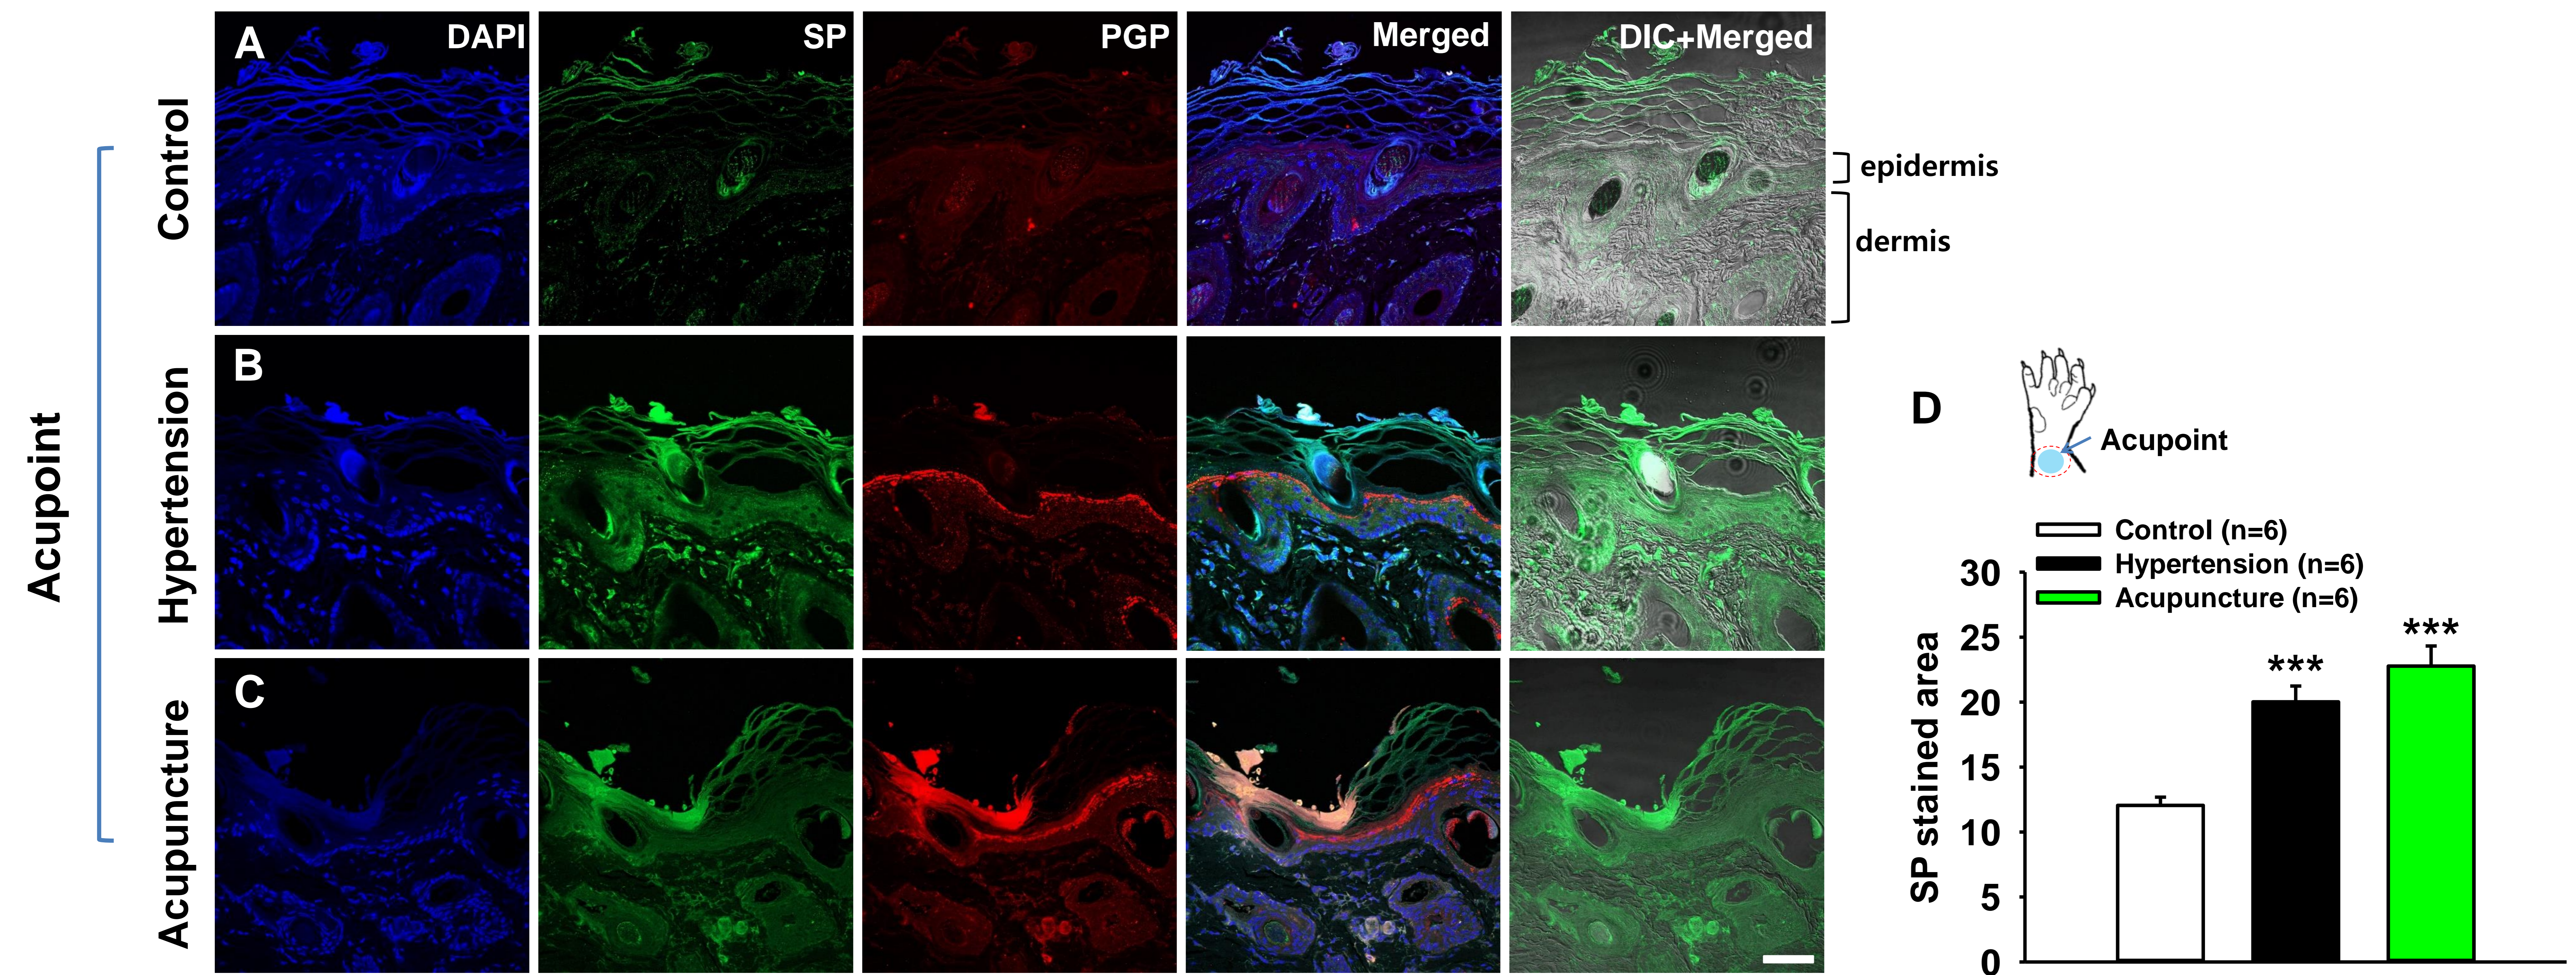

Fig.2

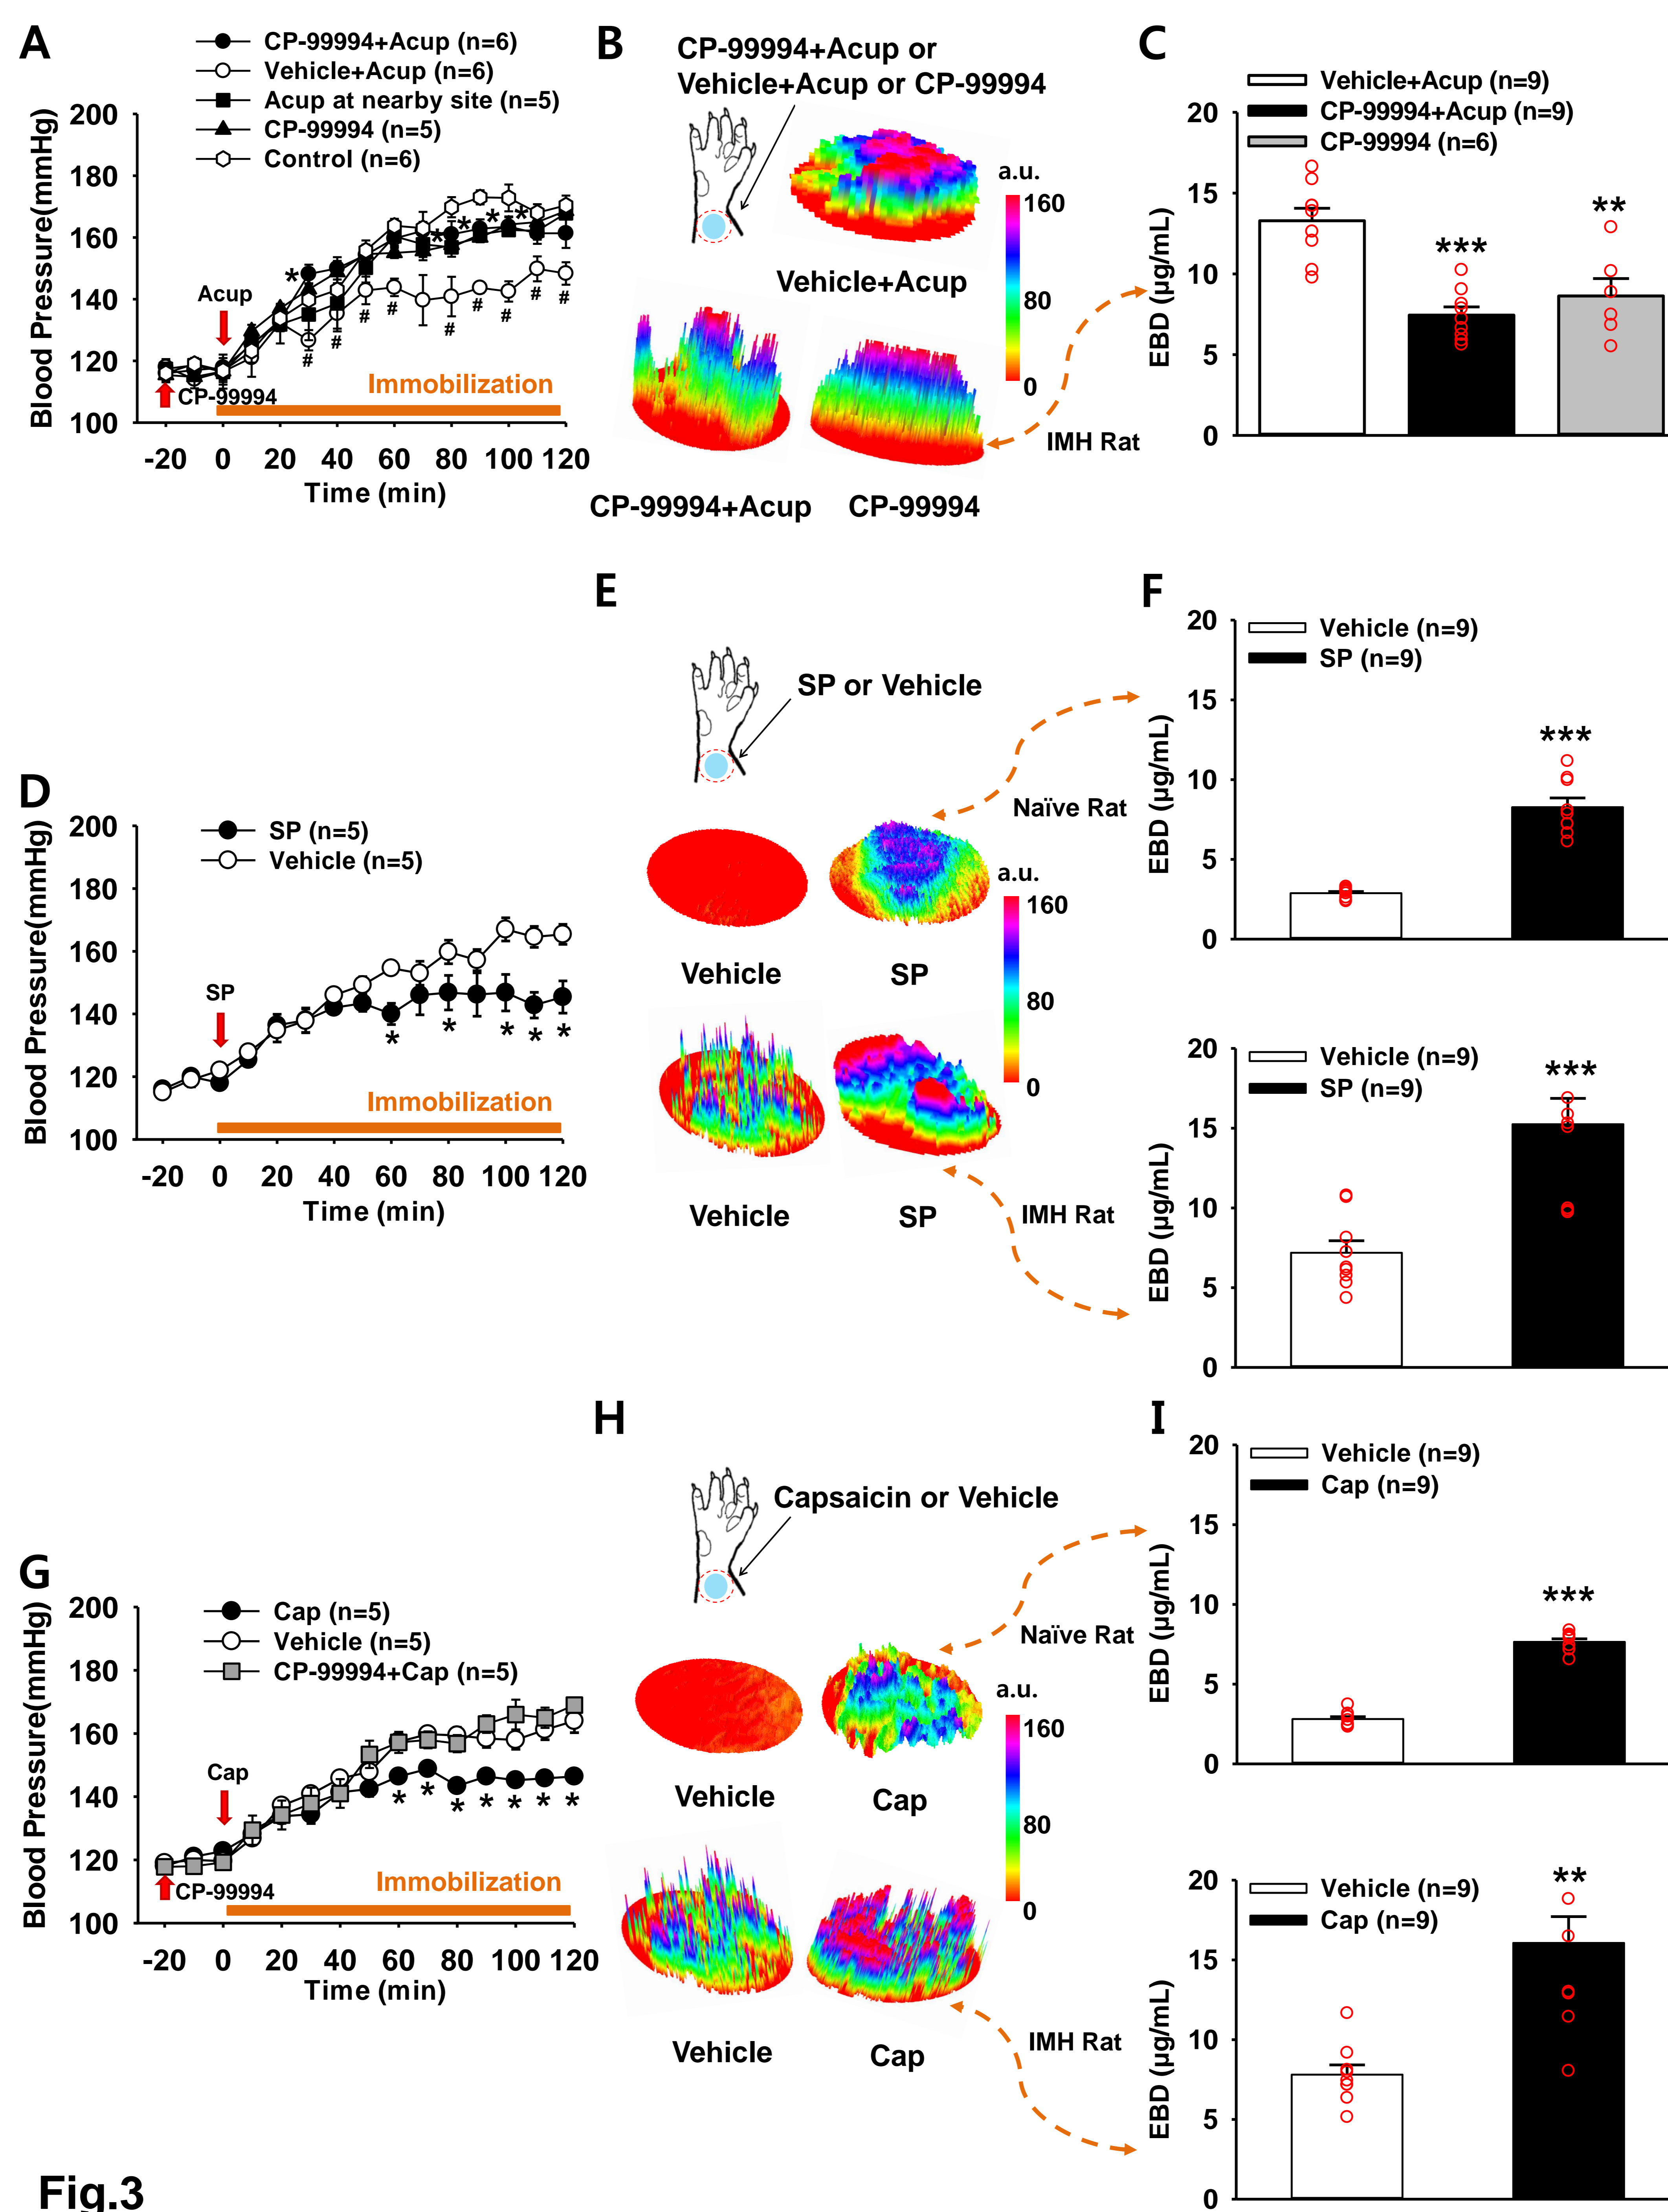

**Fig.3**

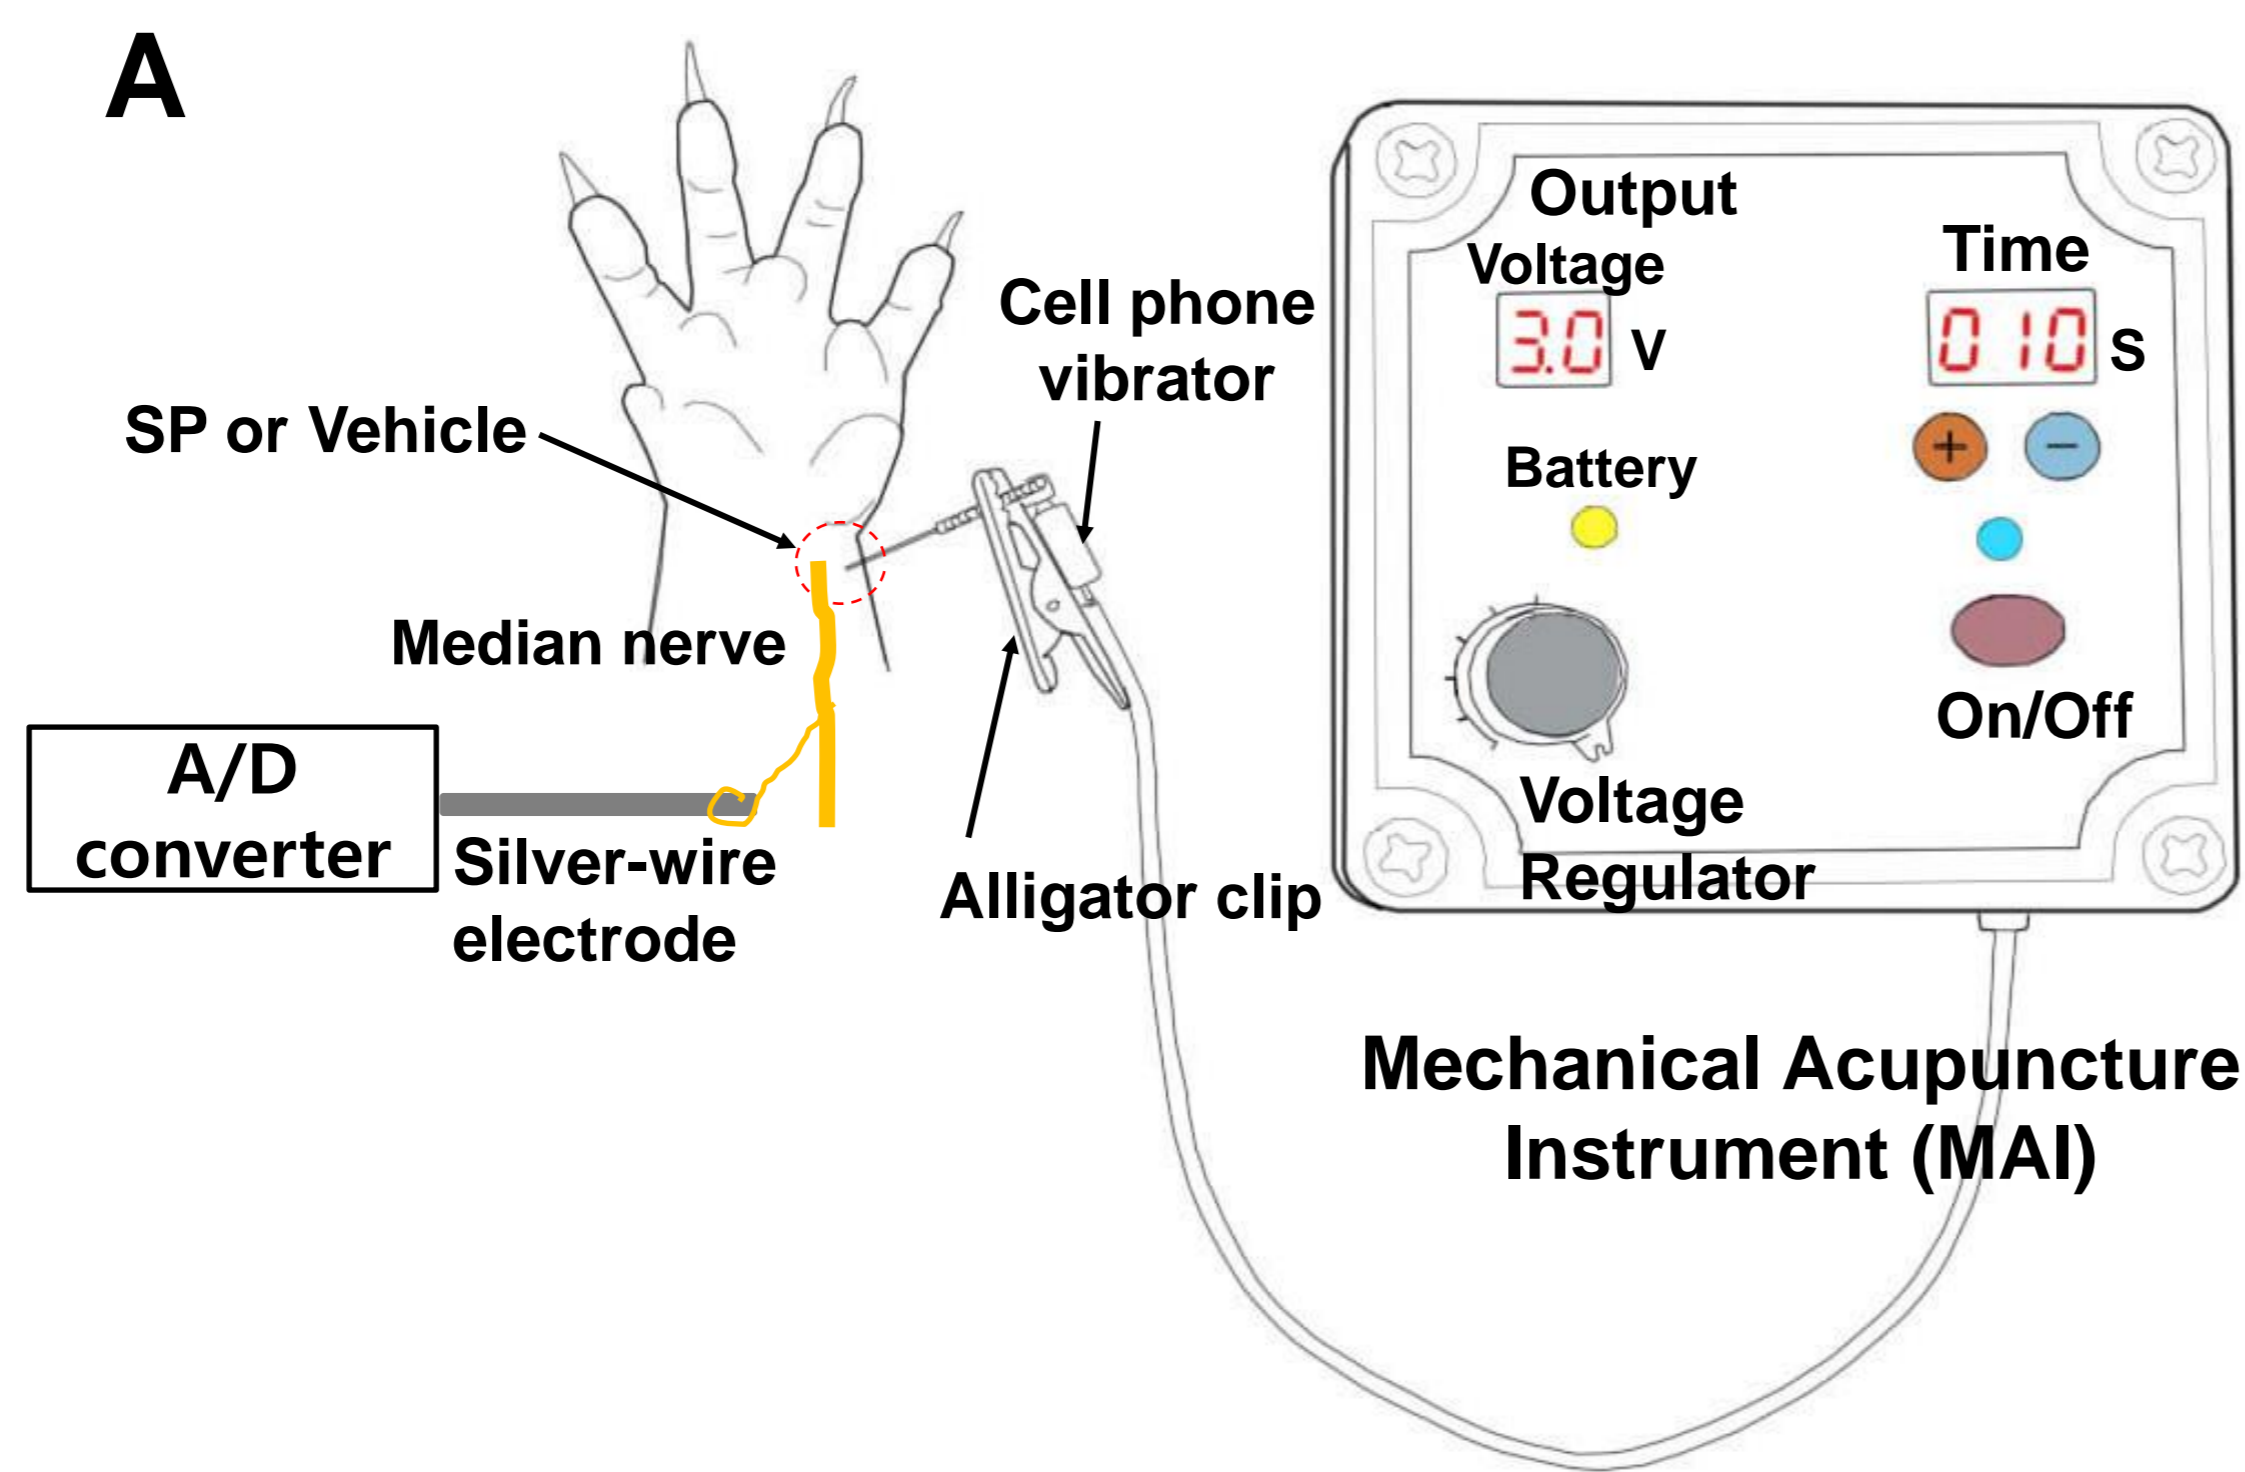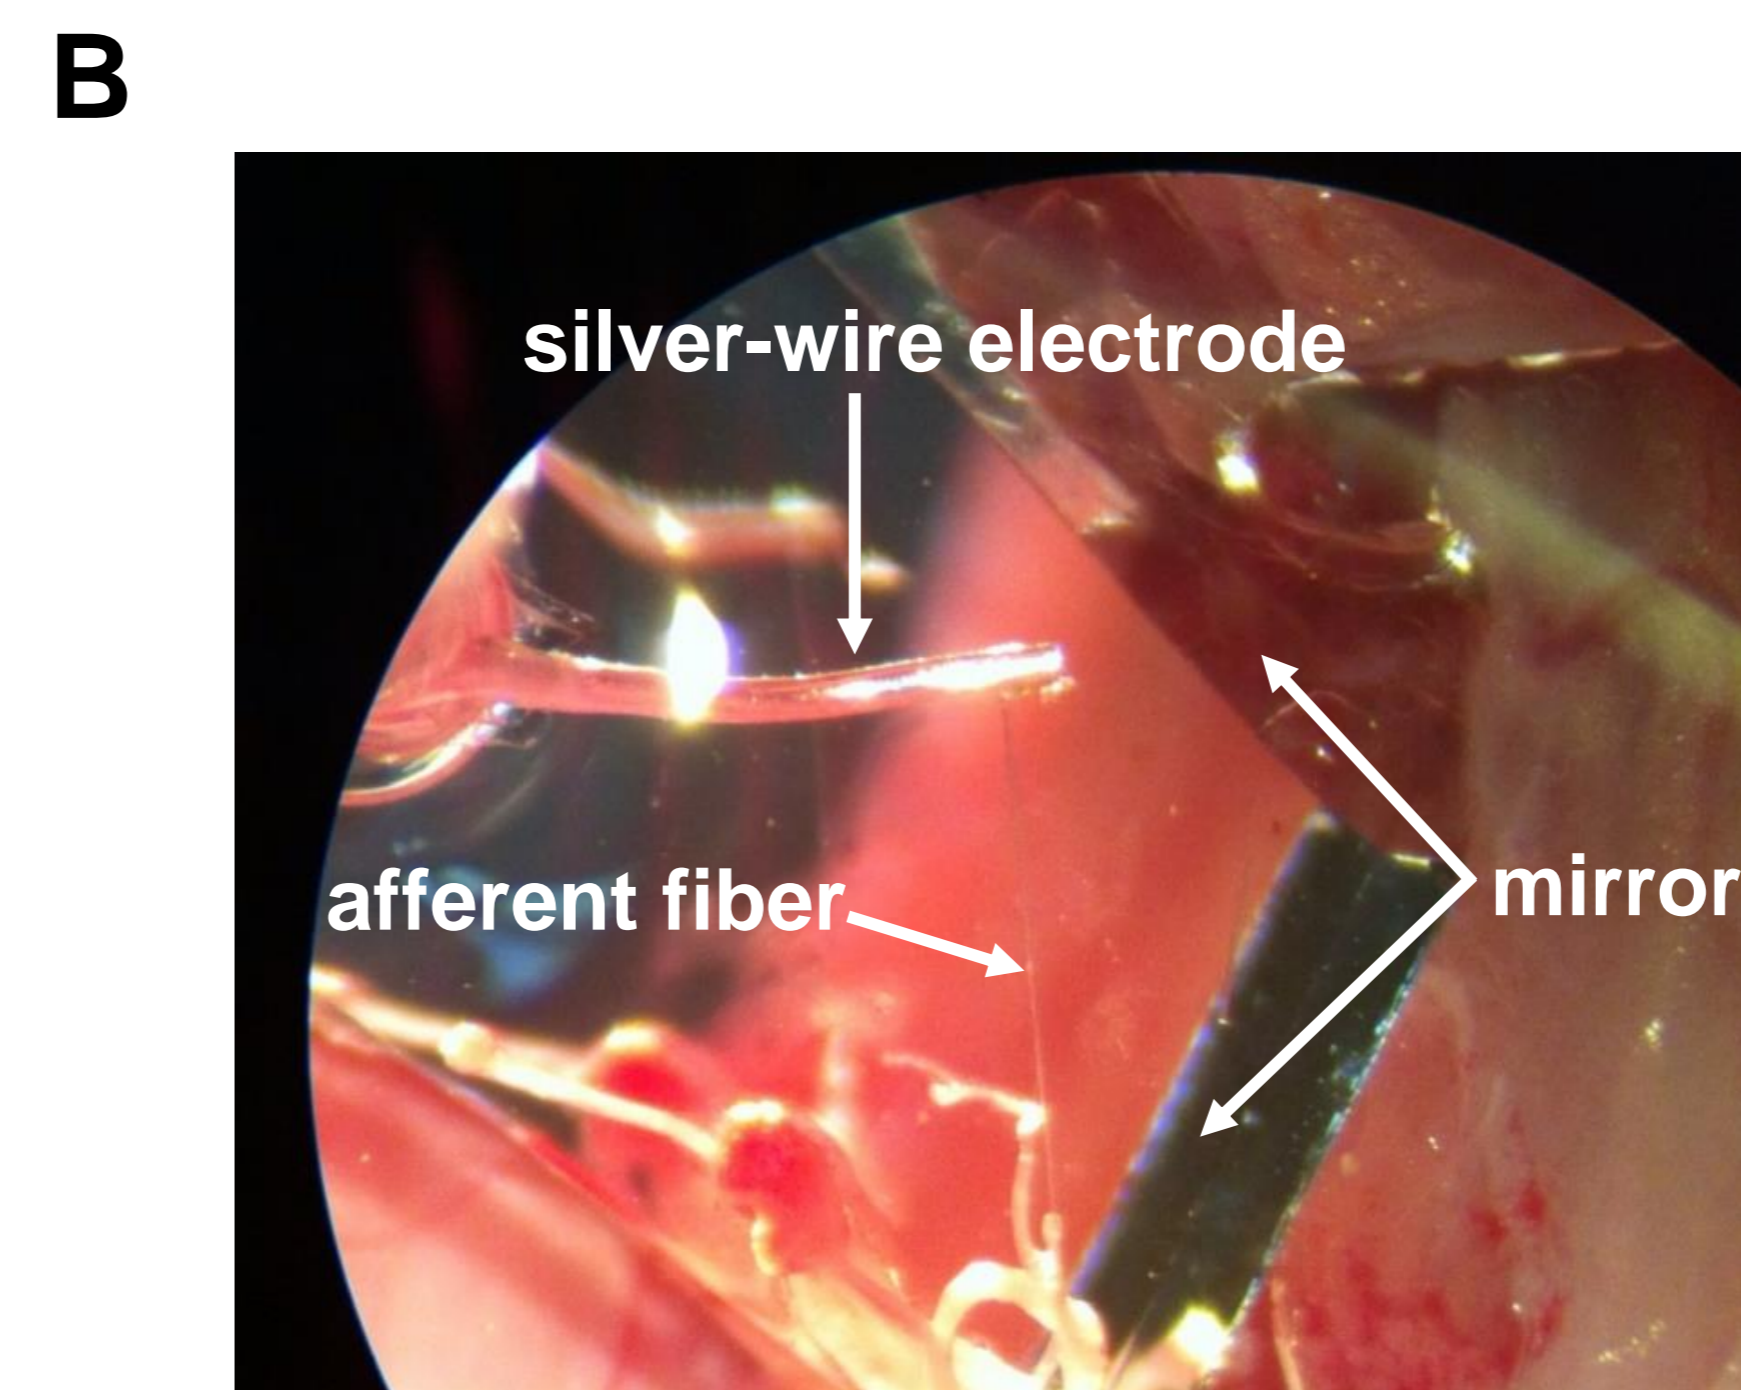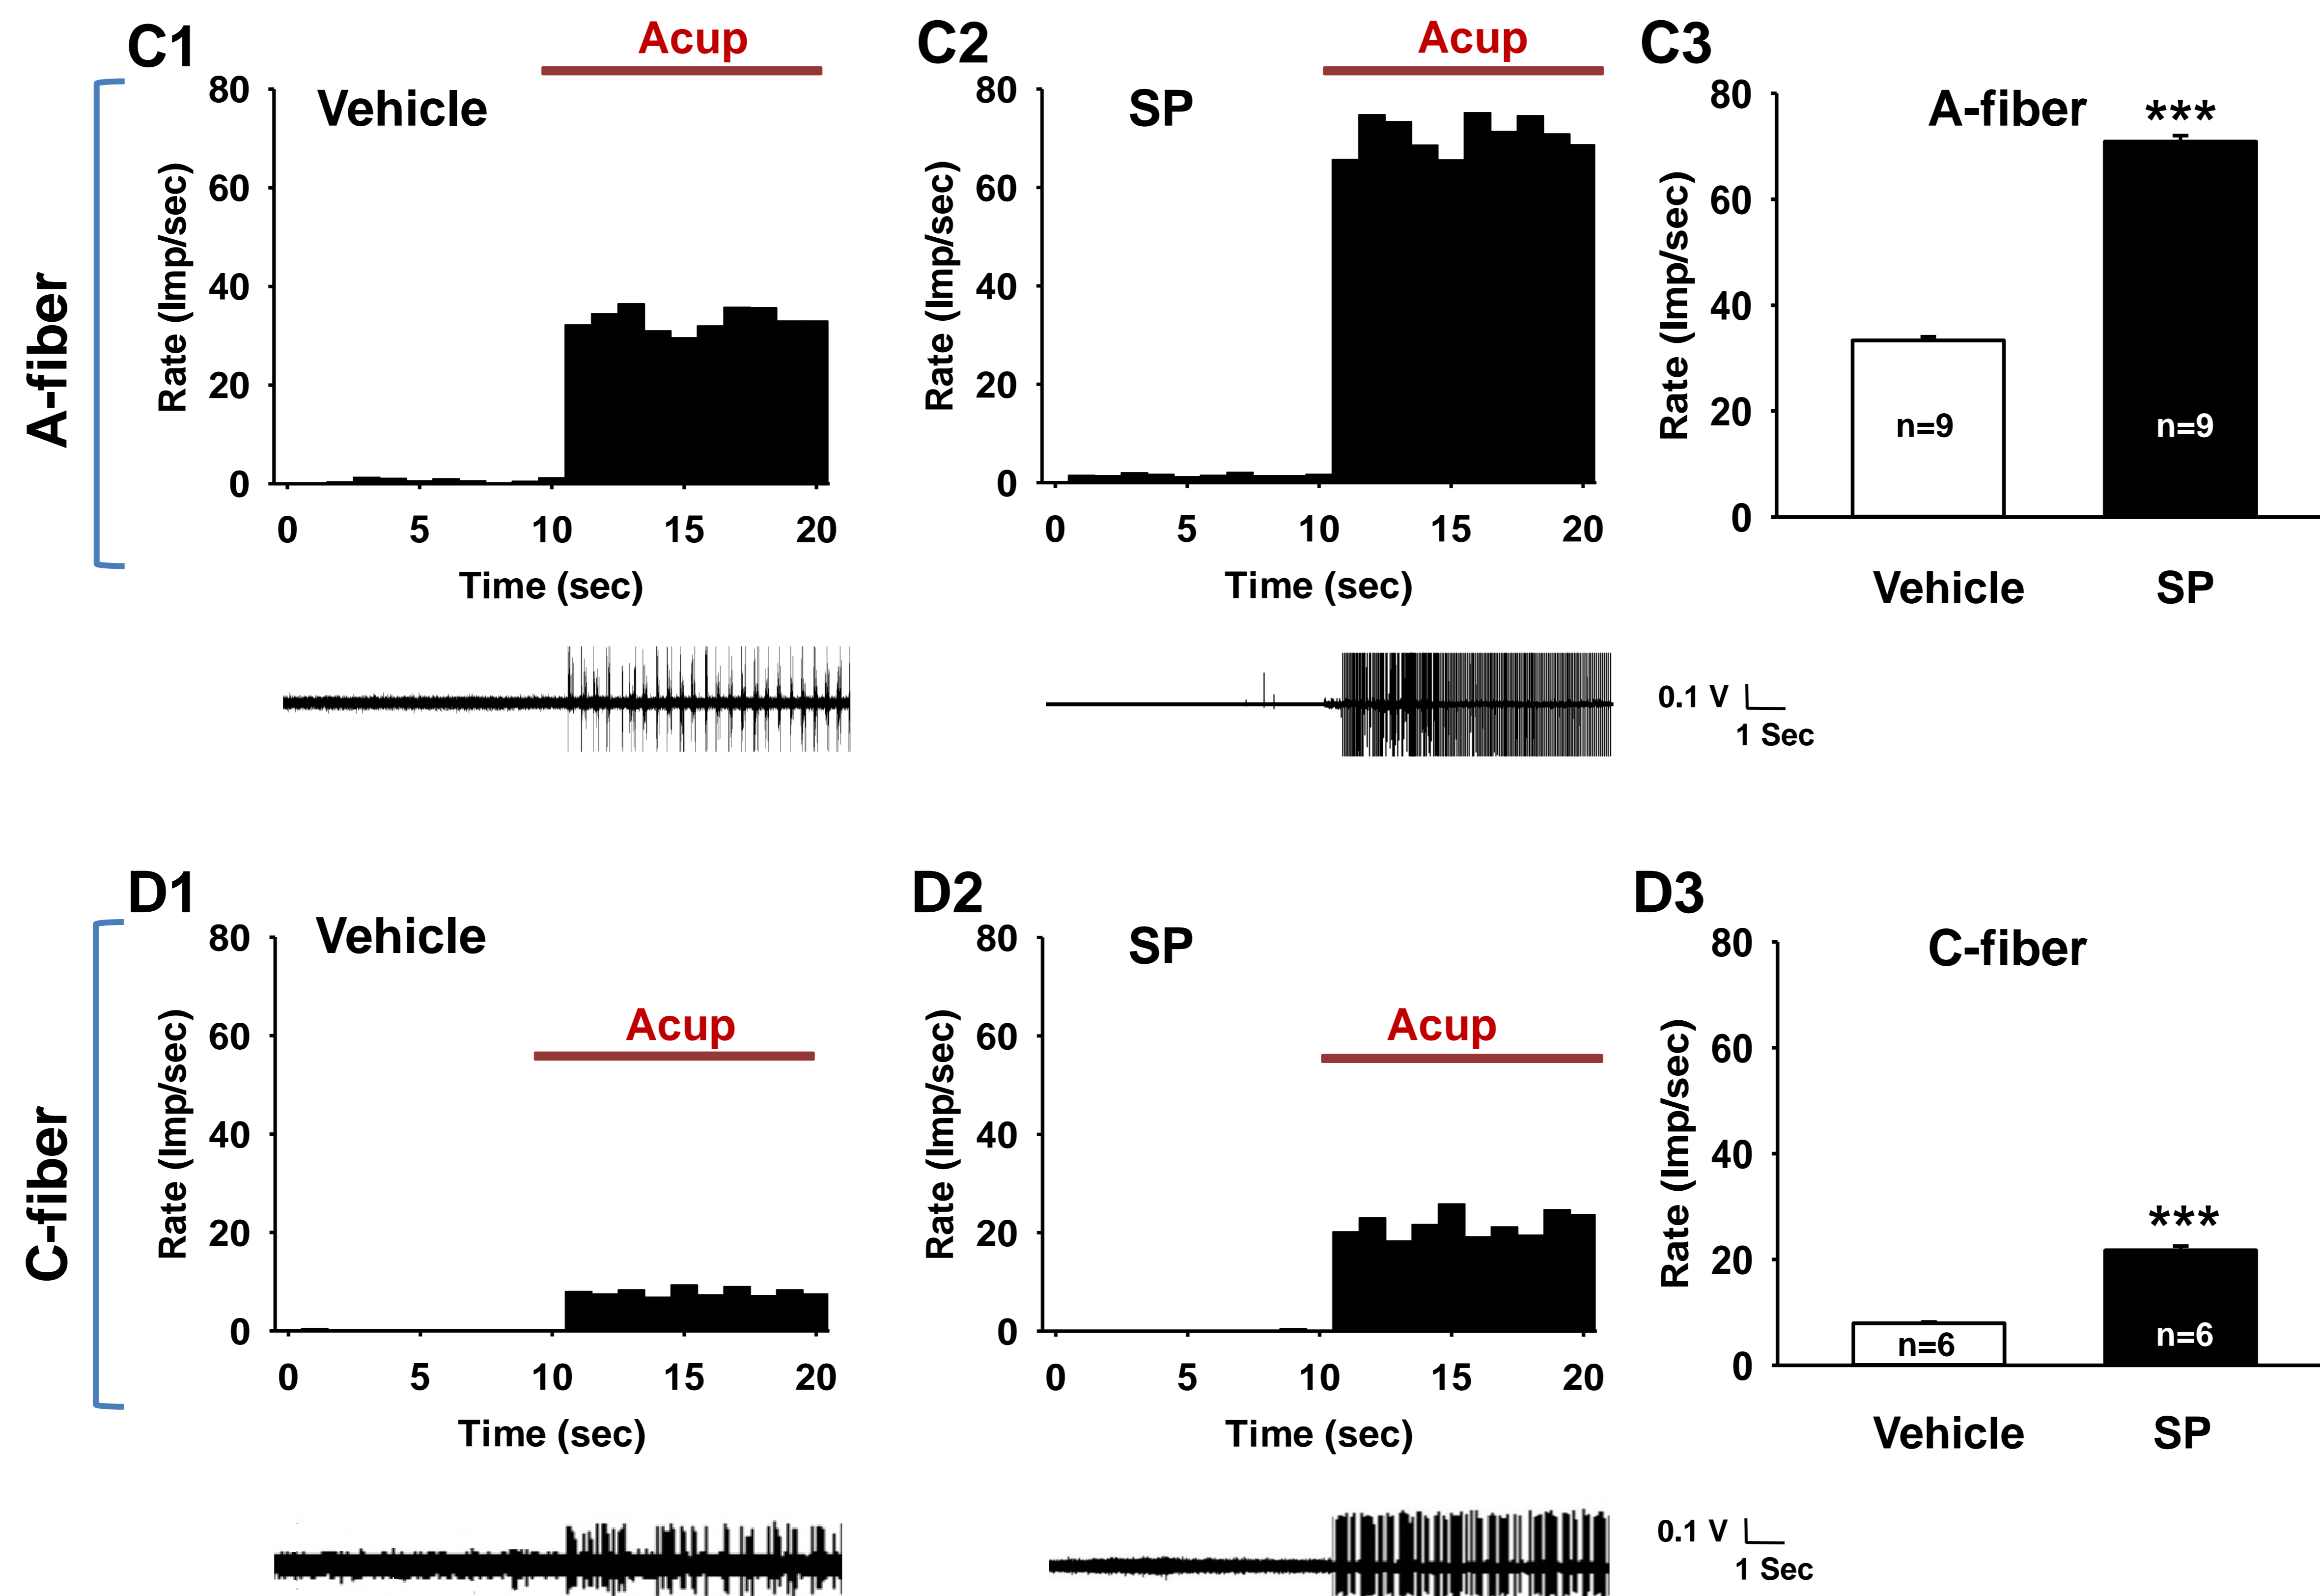

**Fig.4**

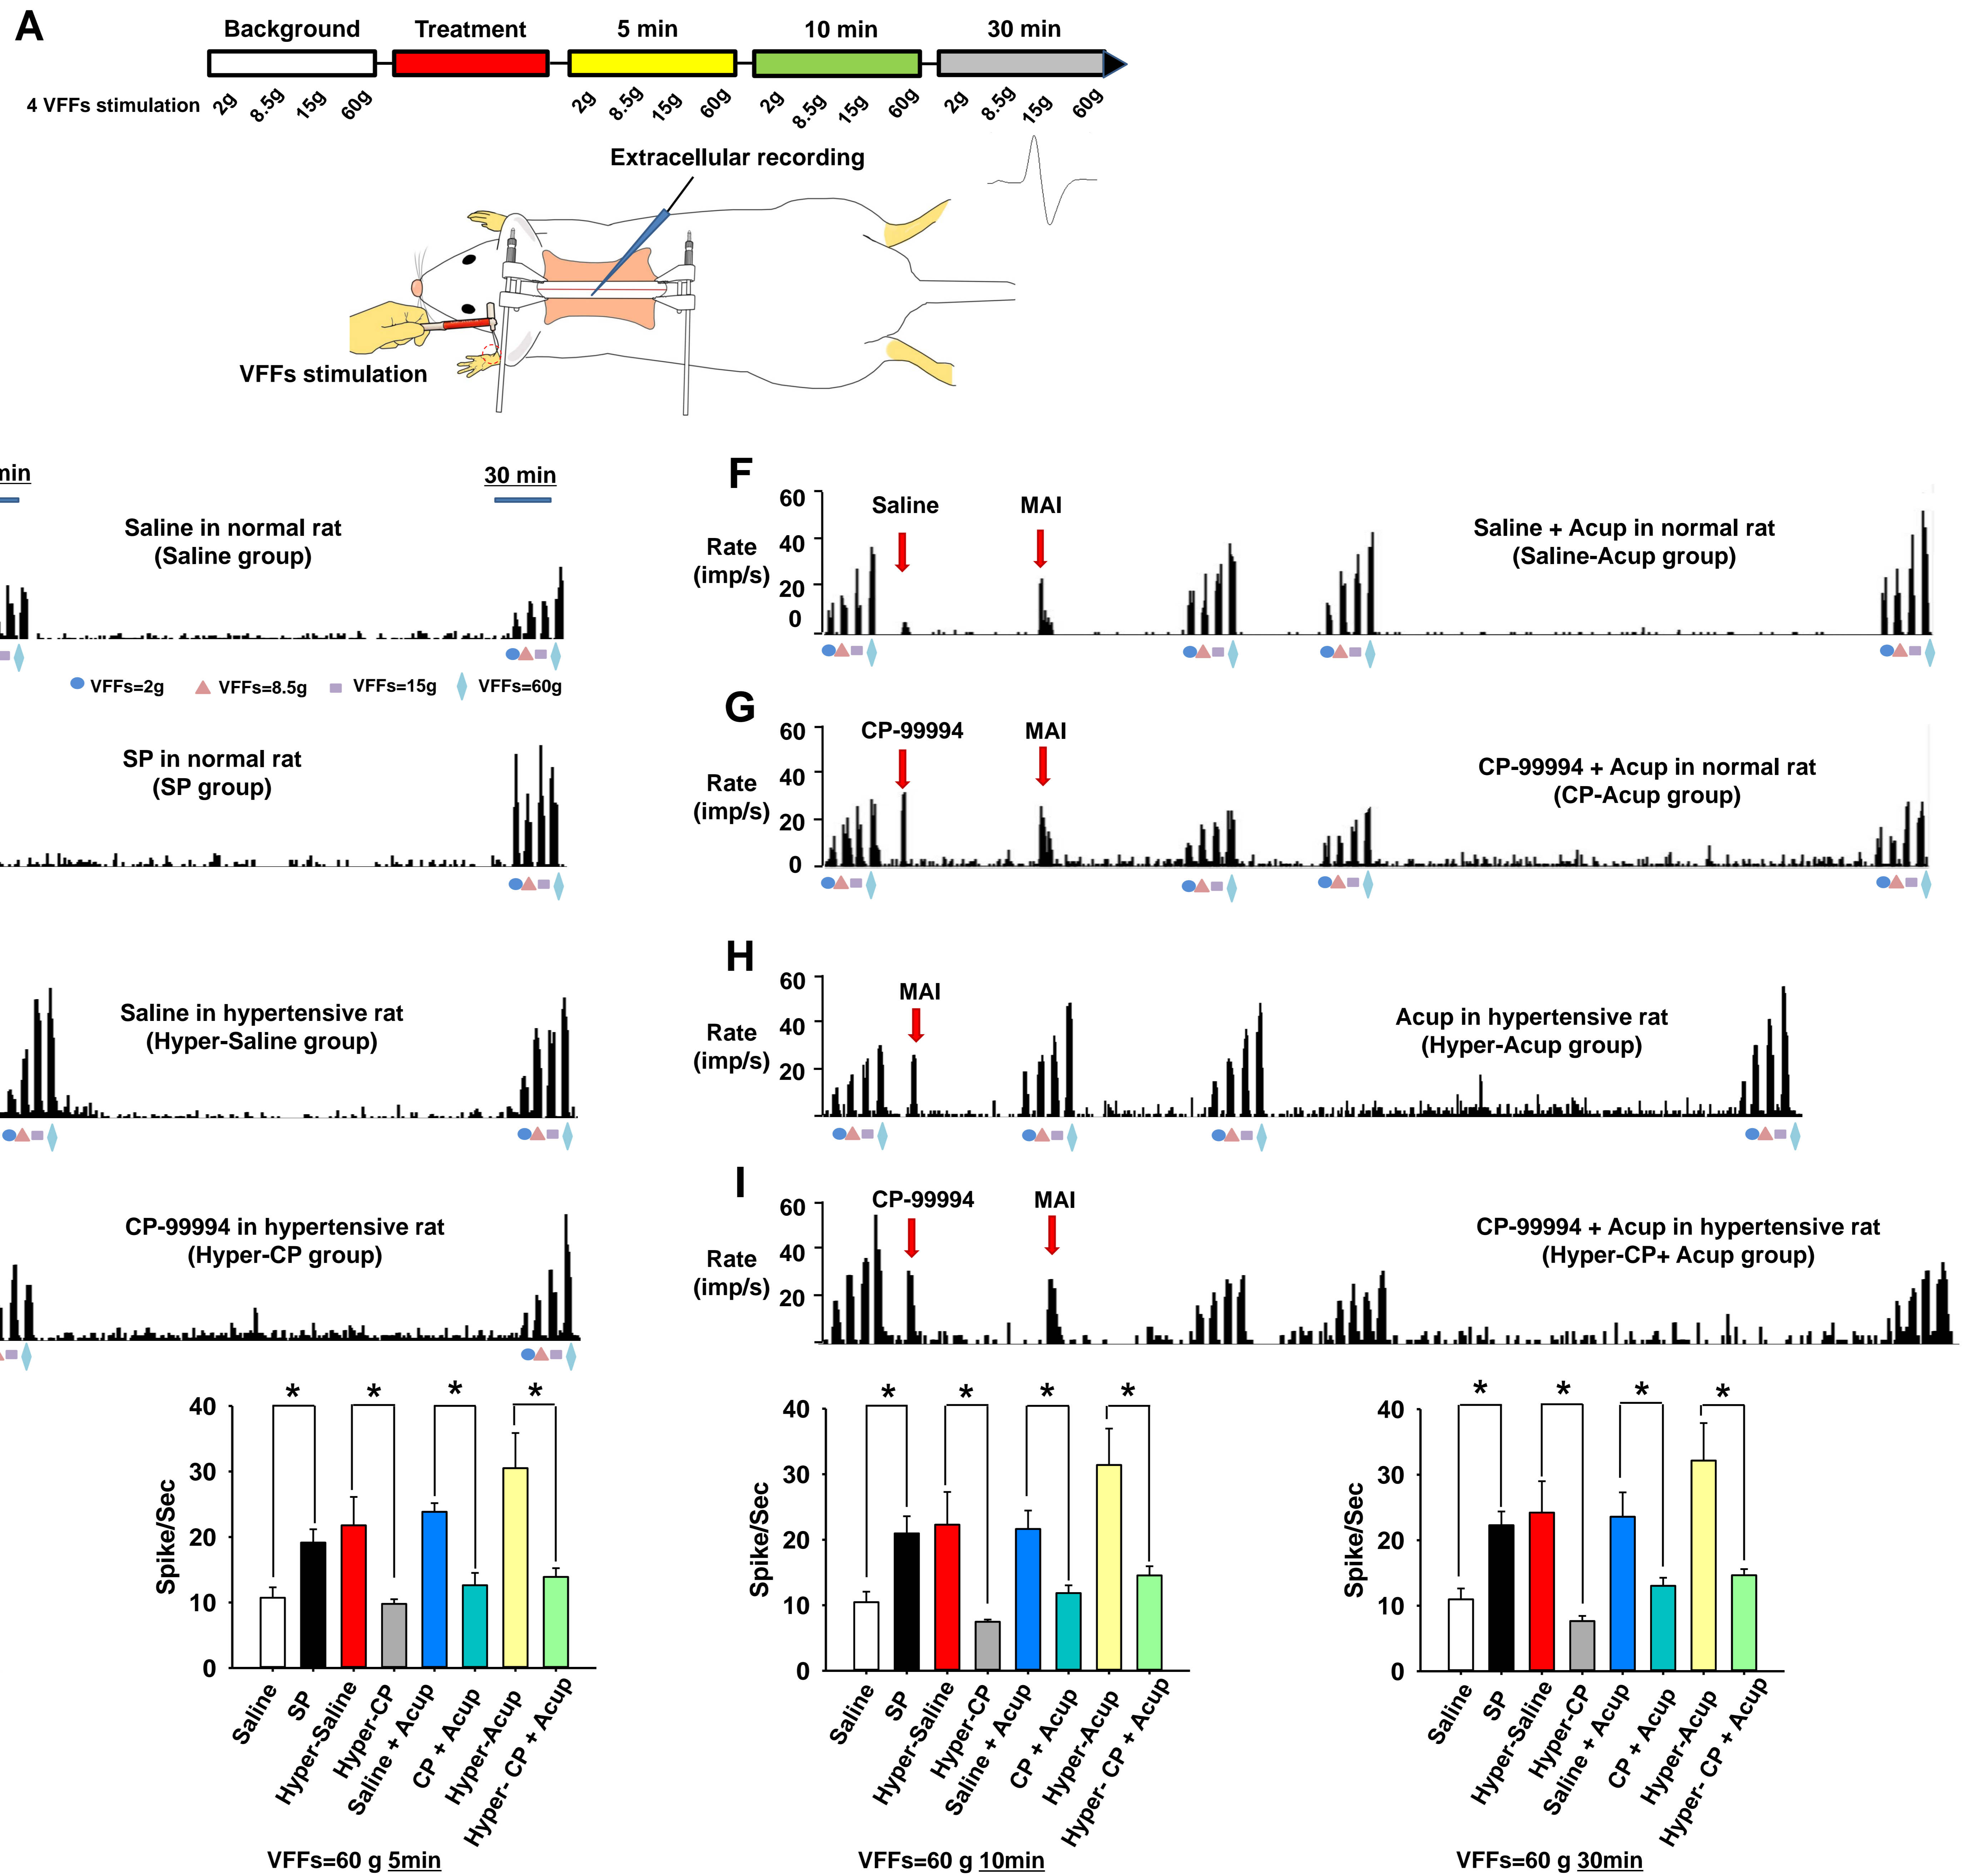

**Fig.5**

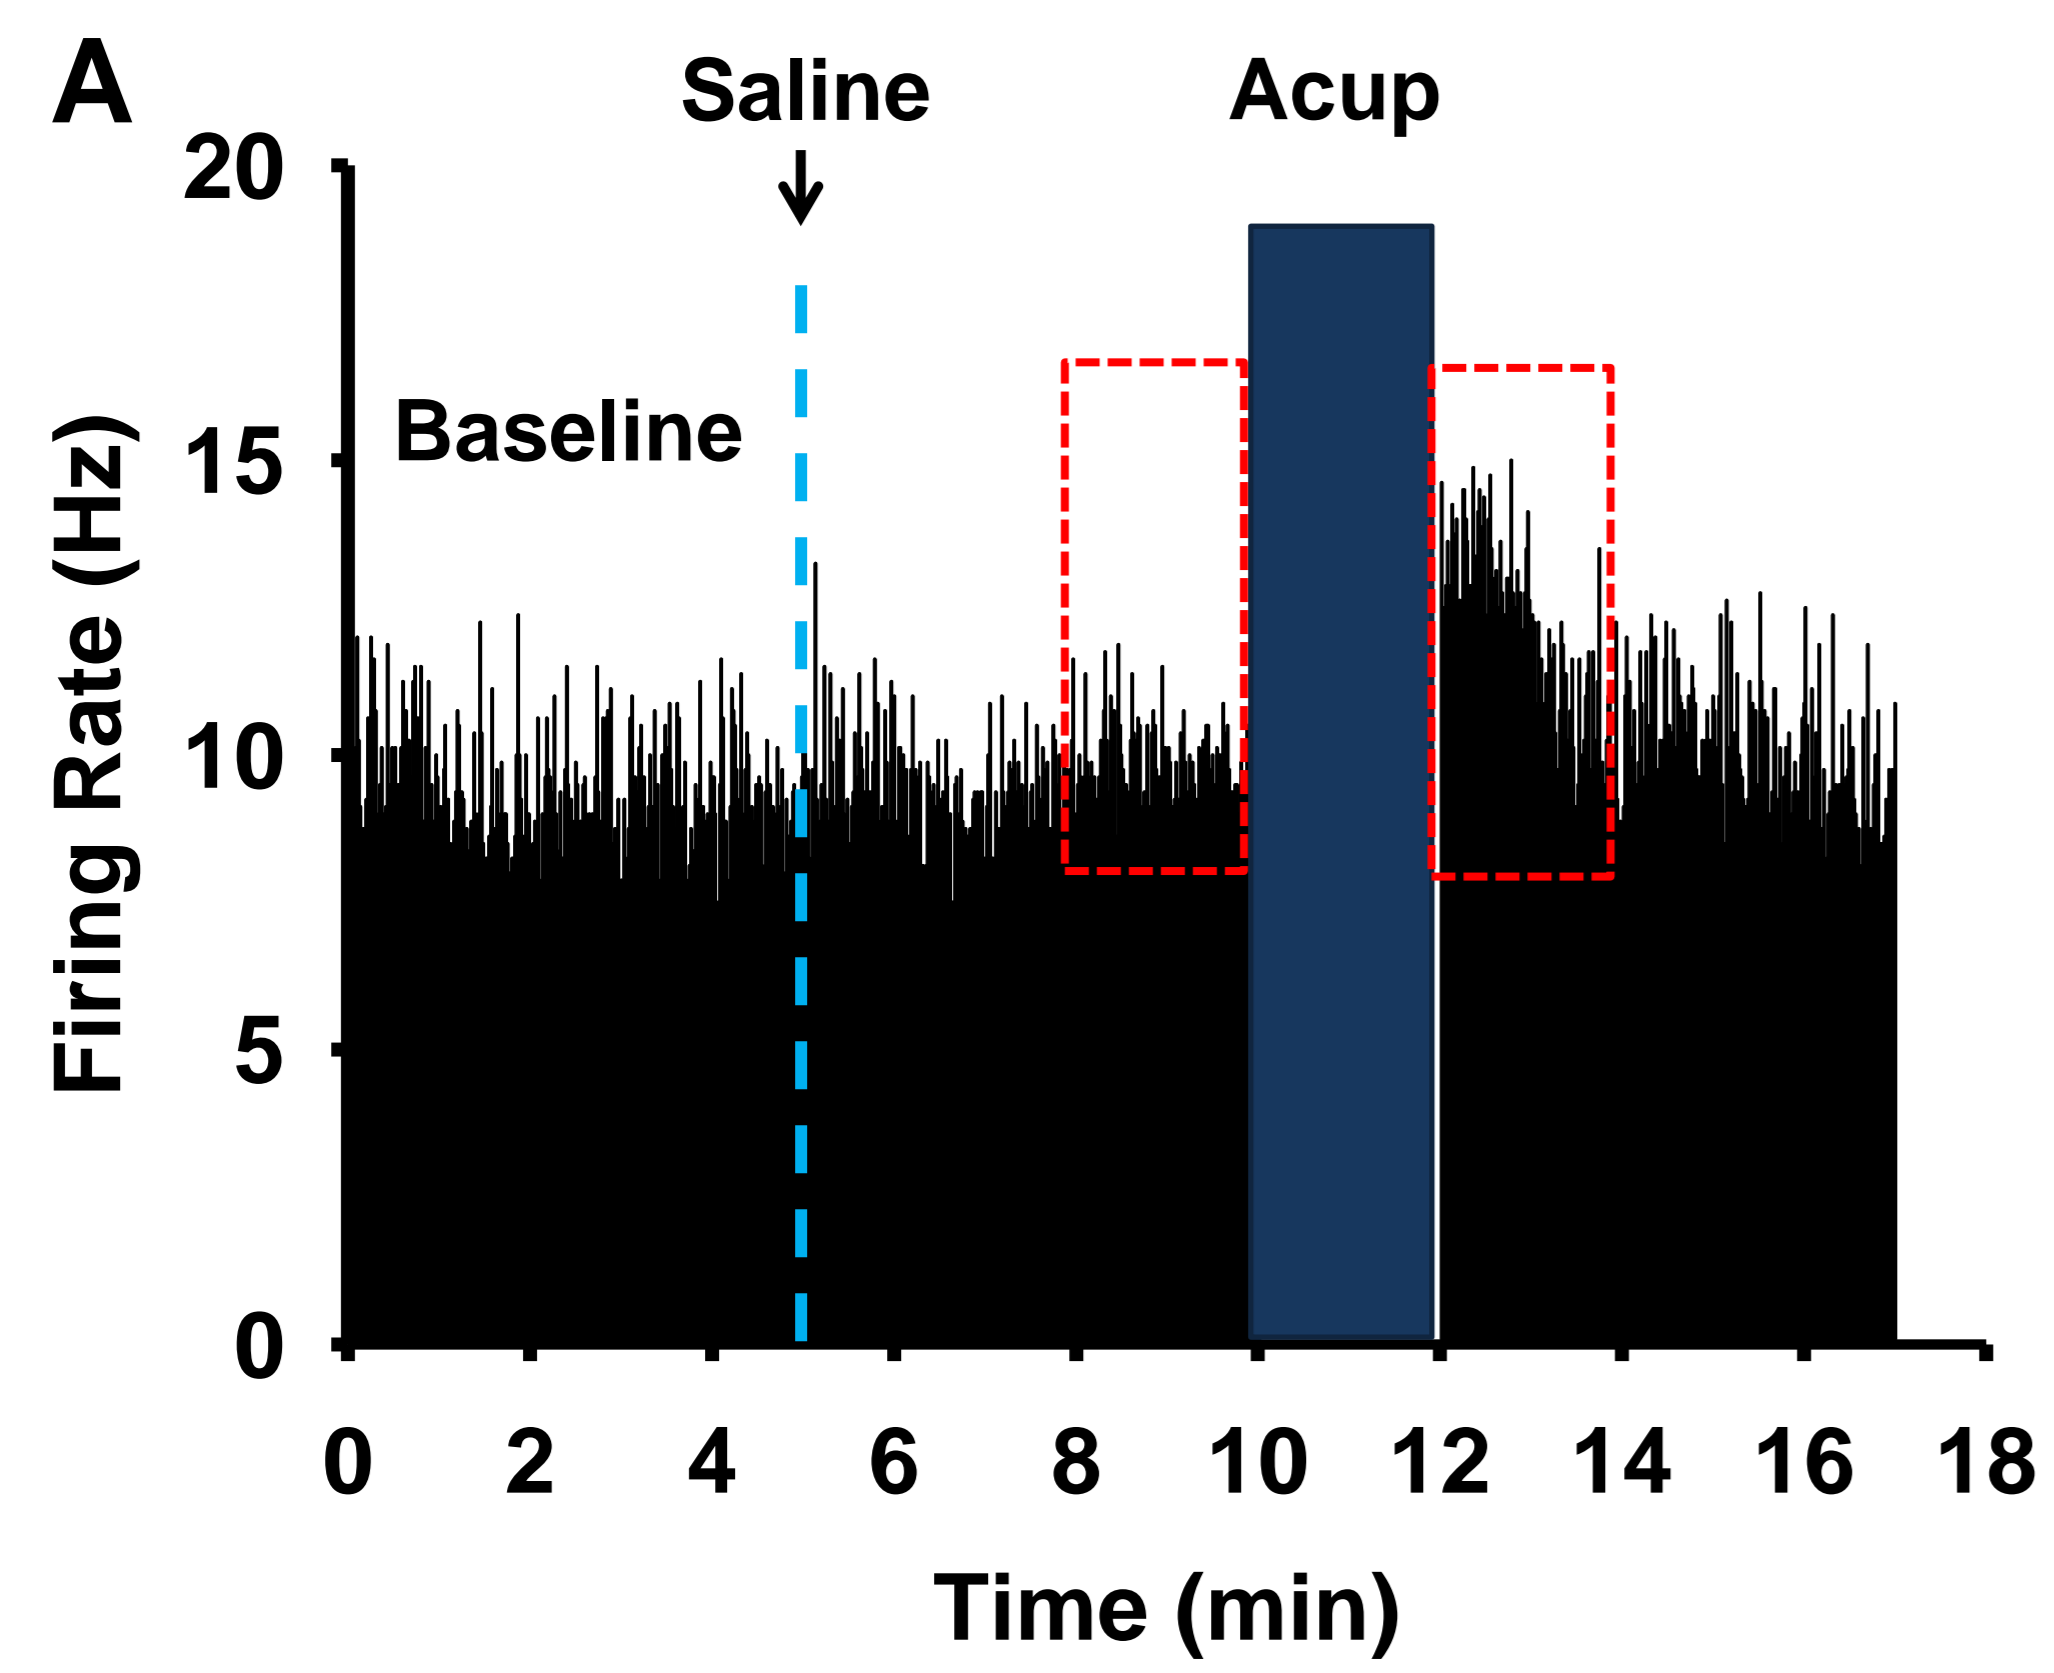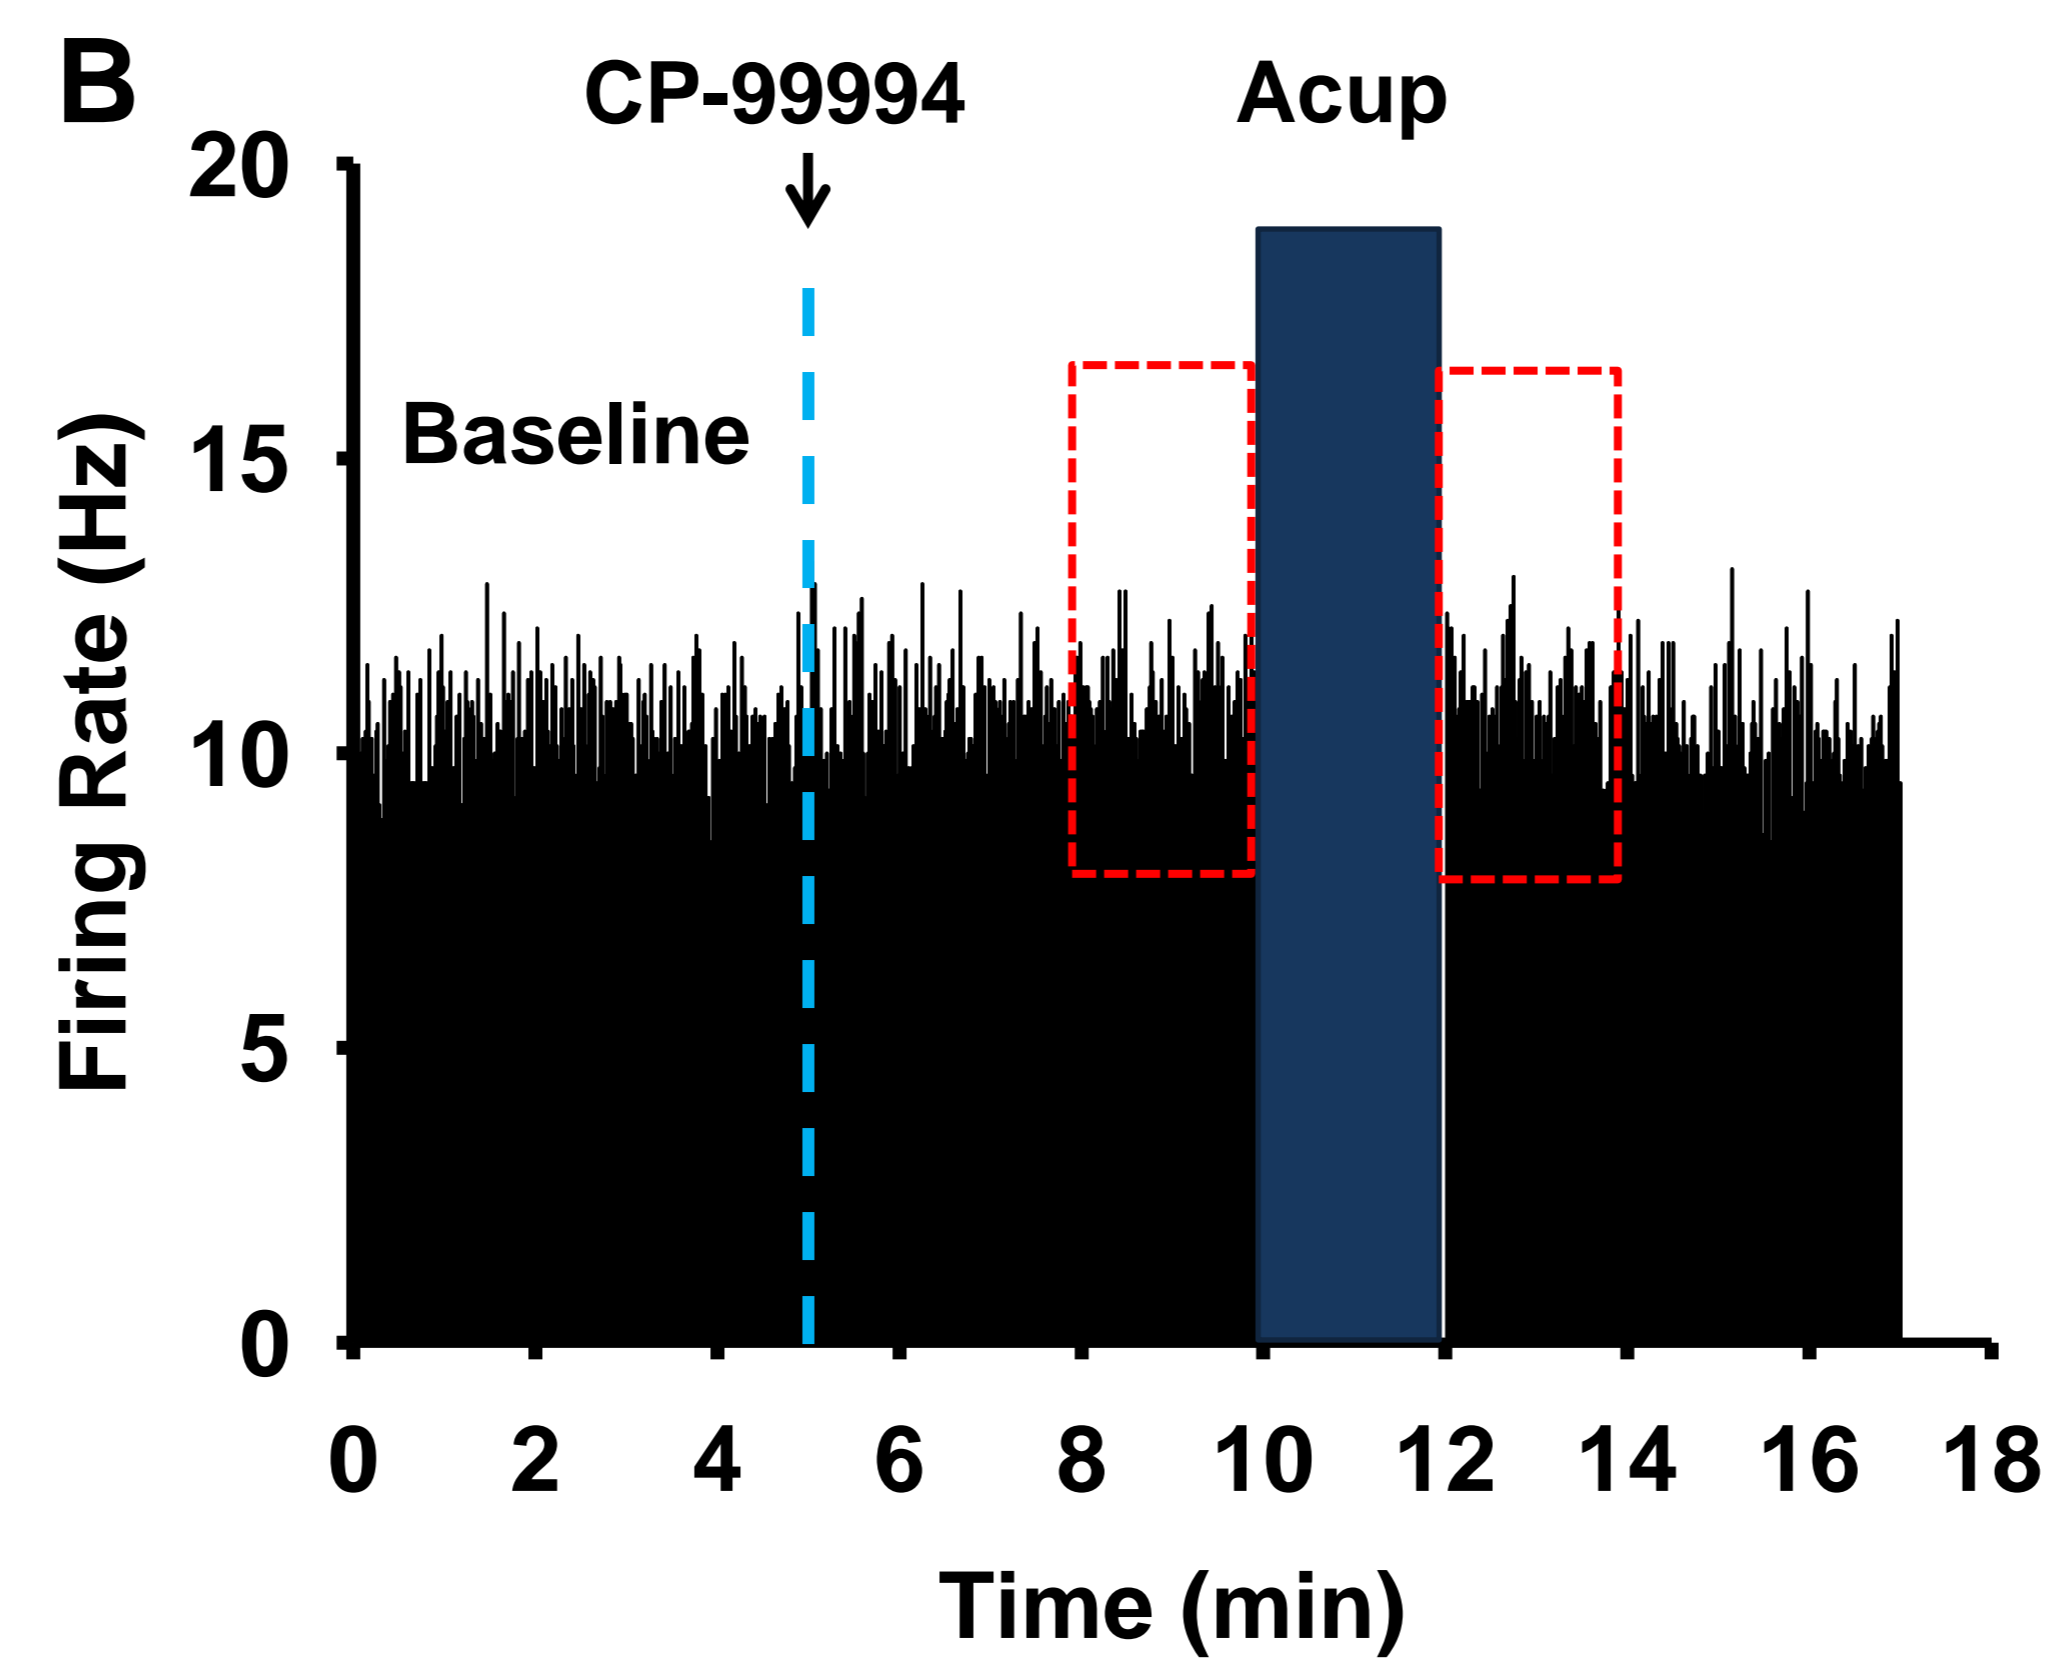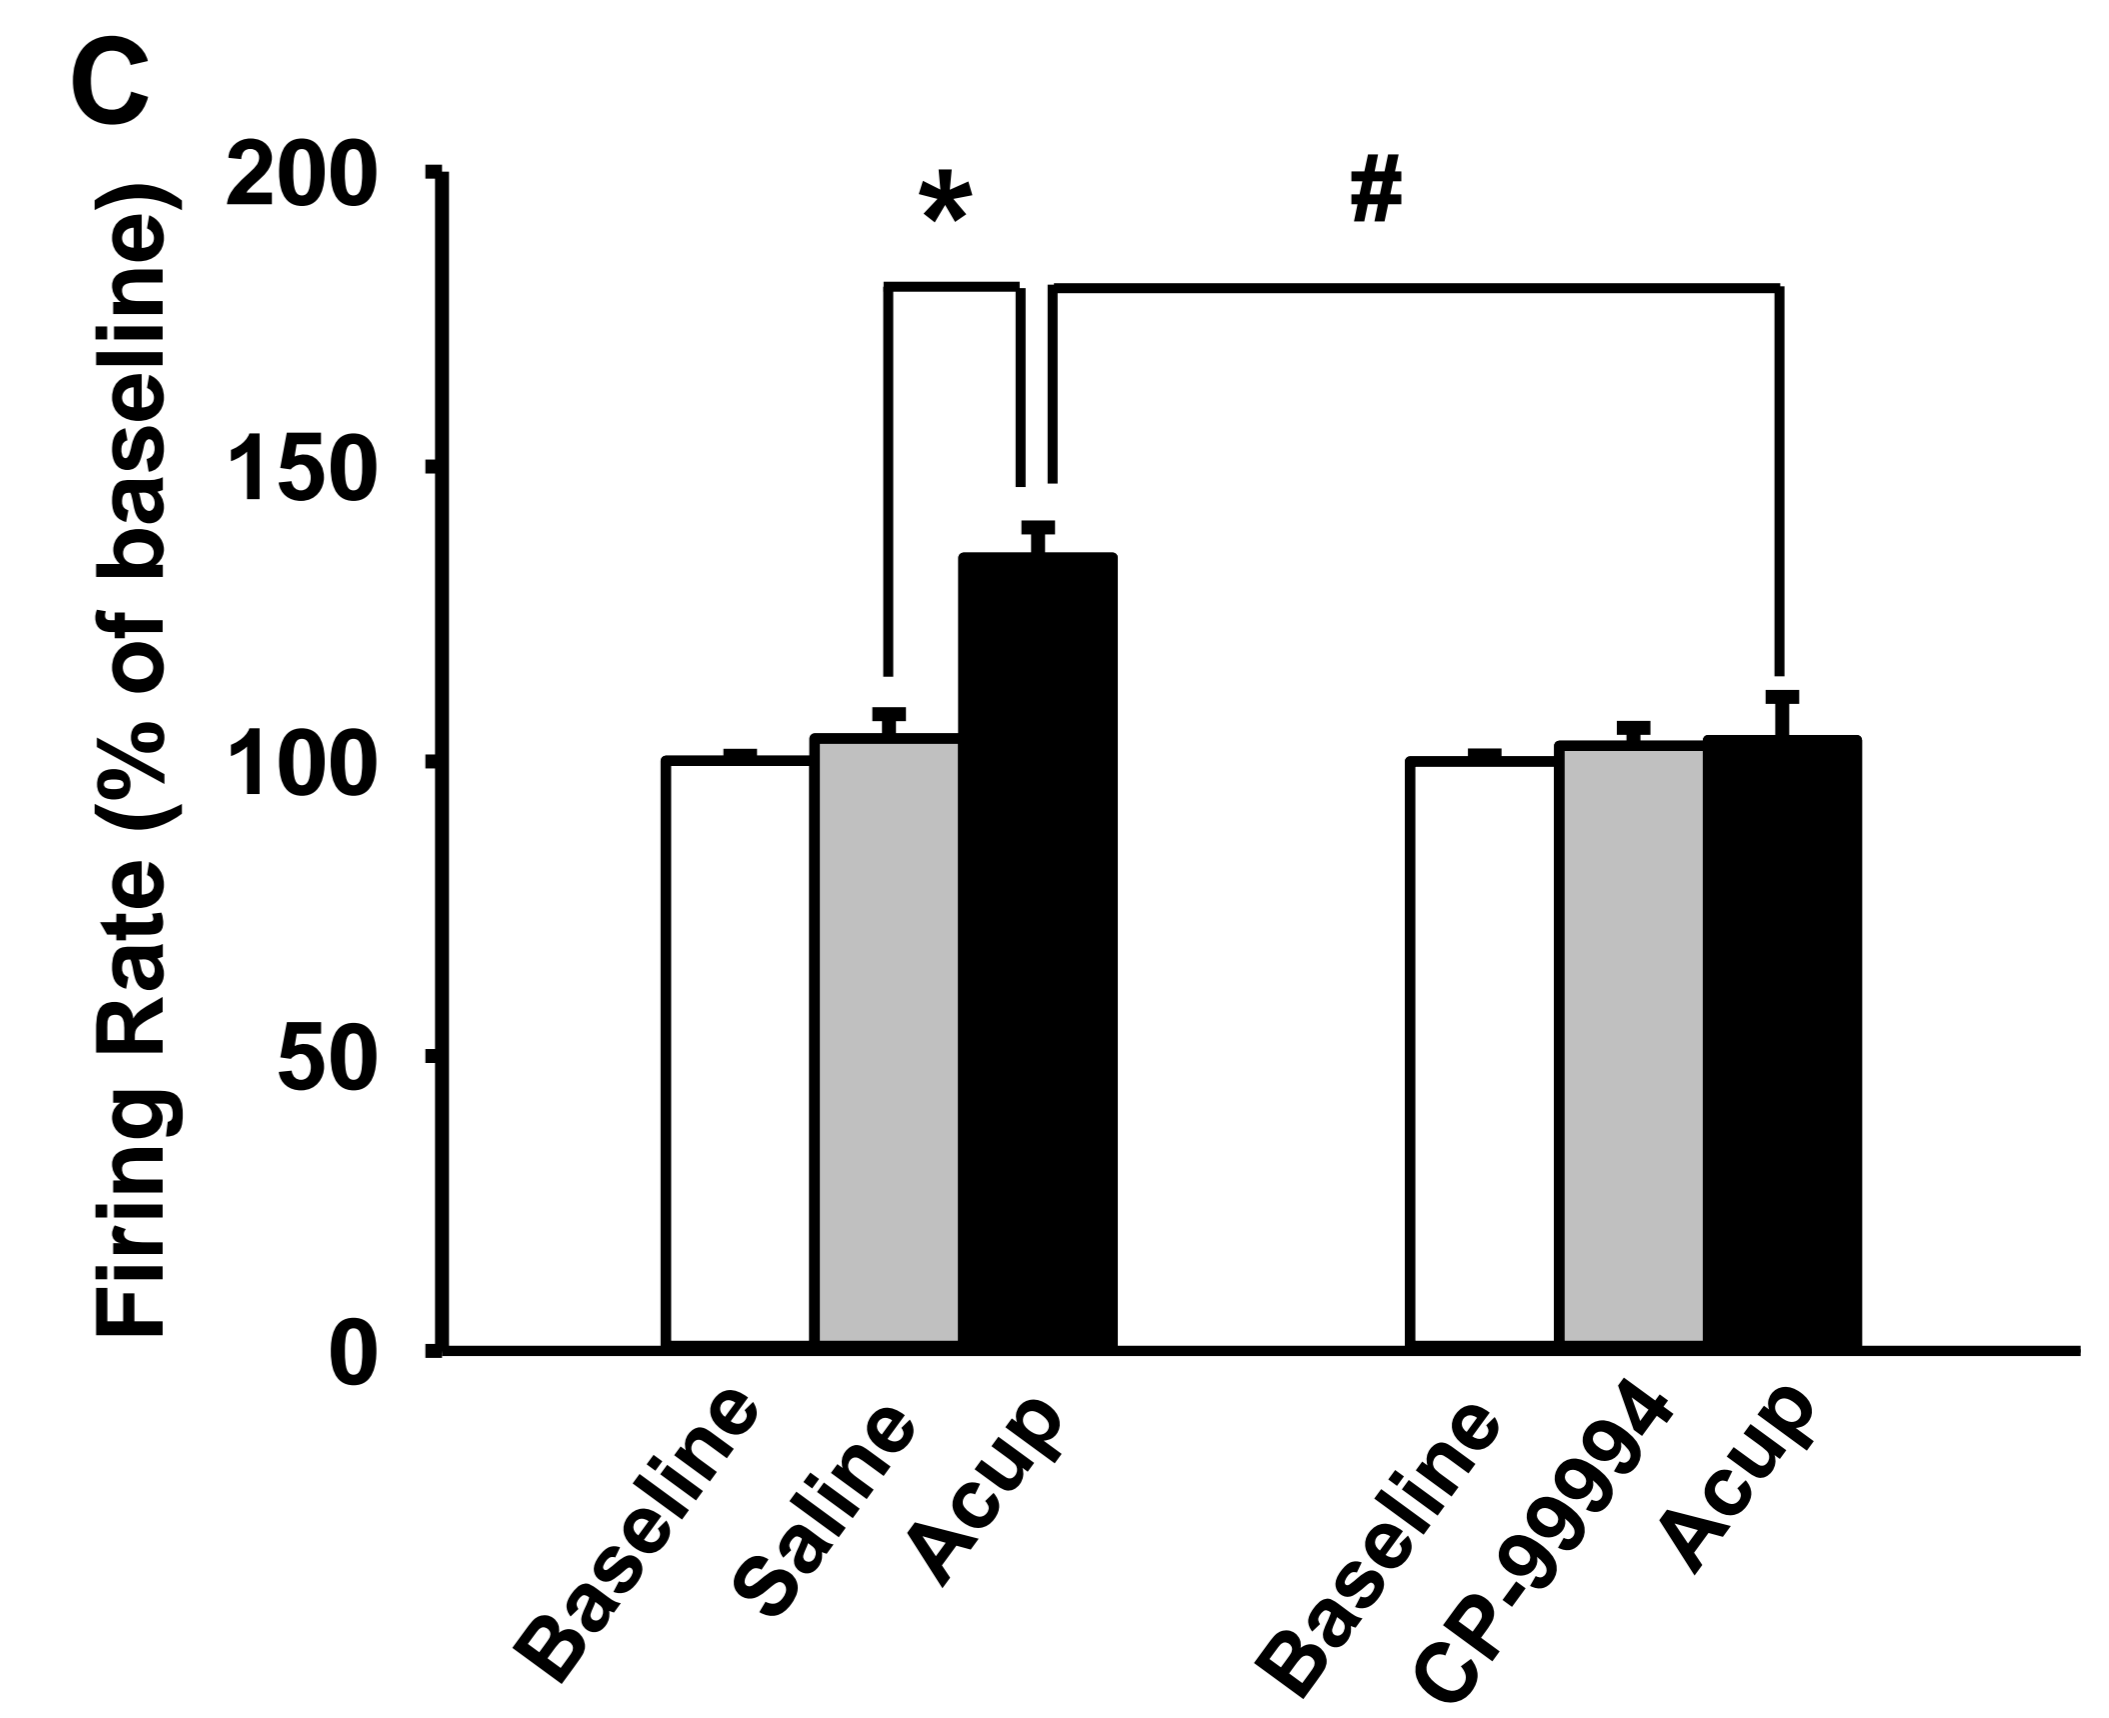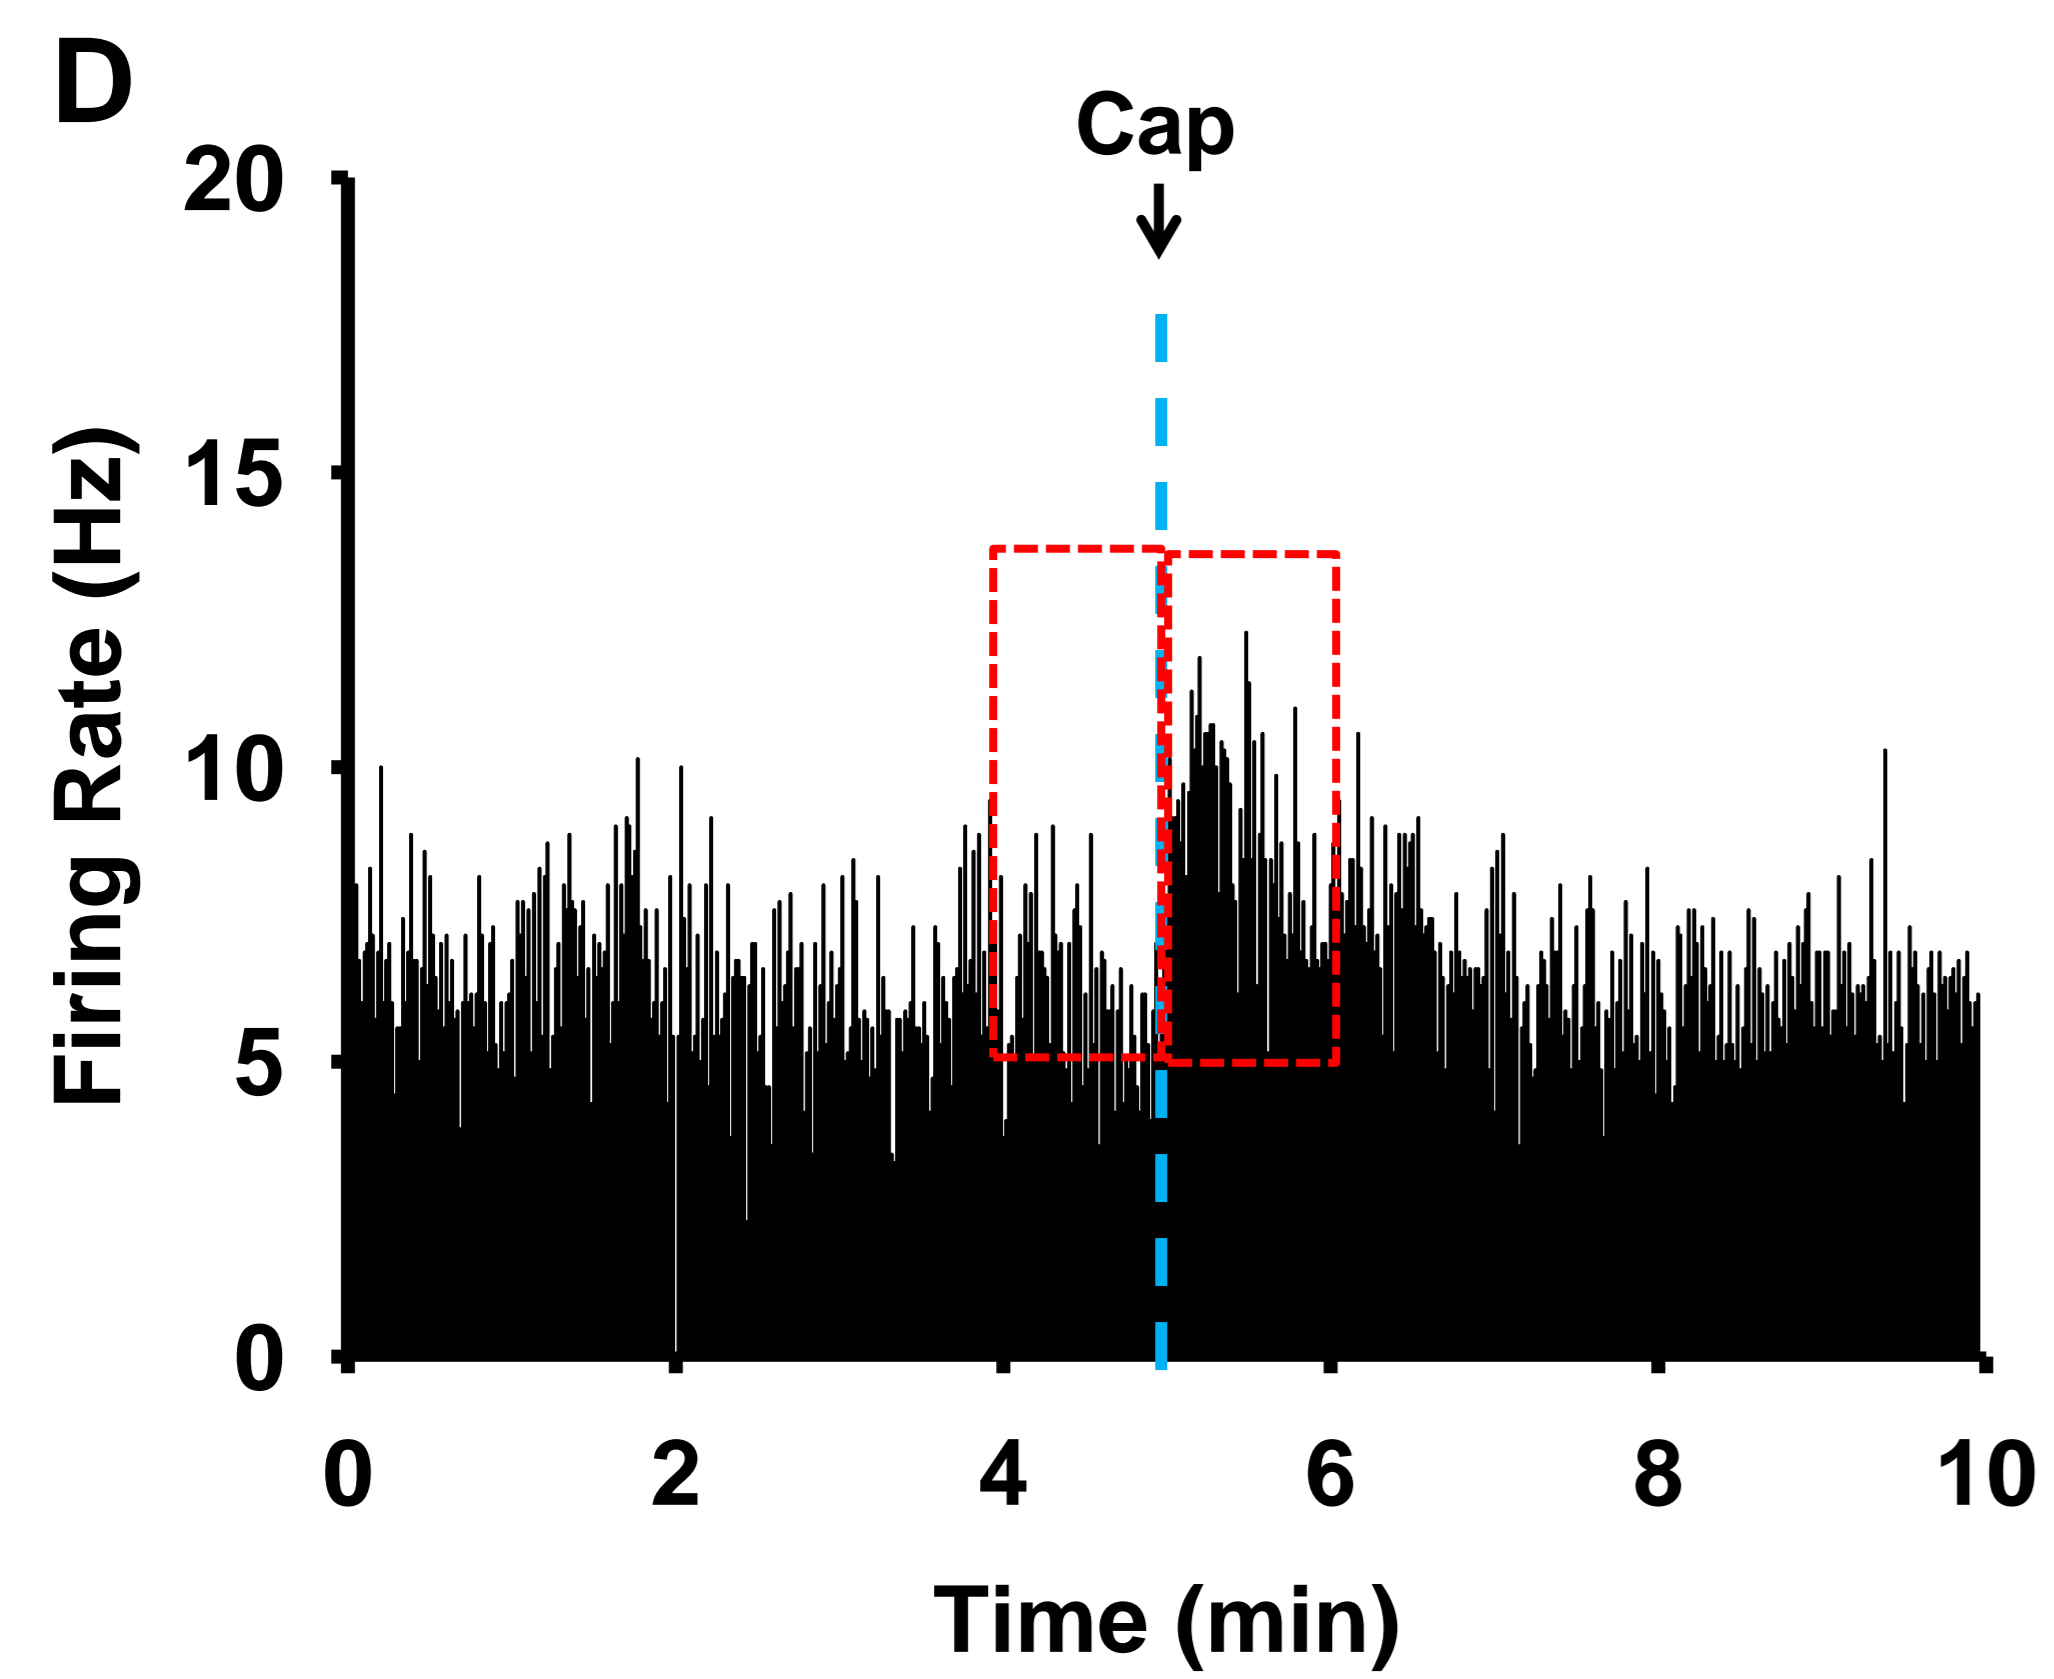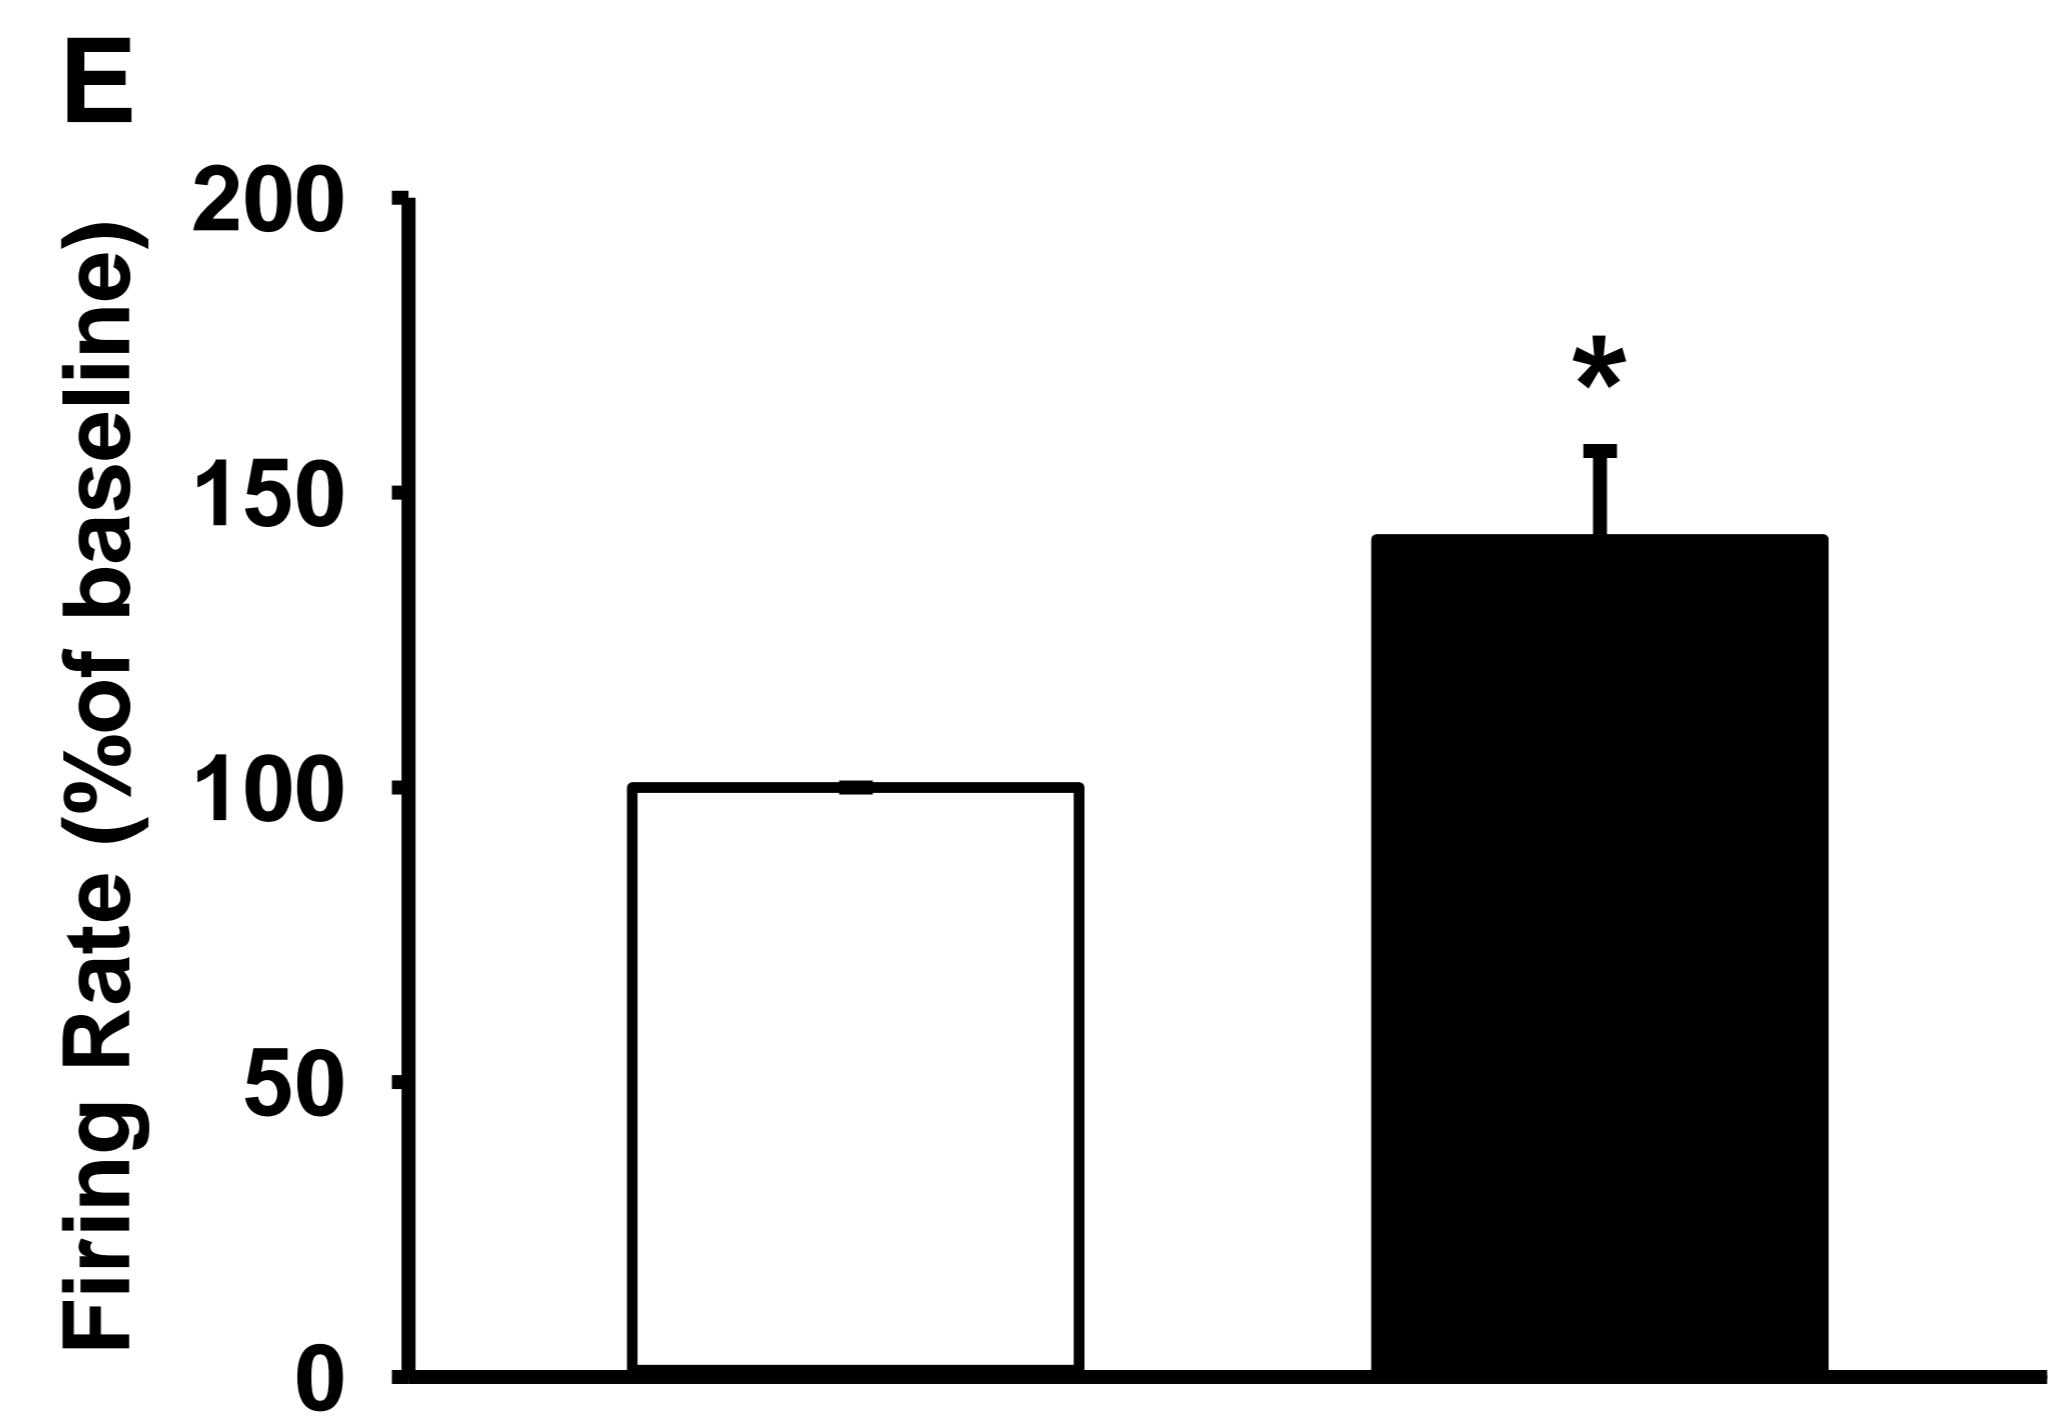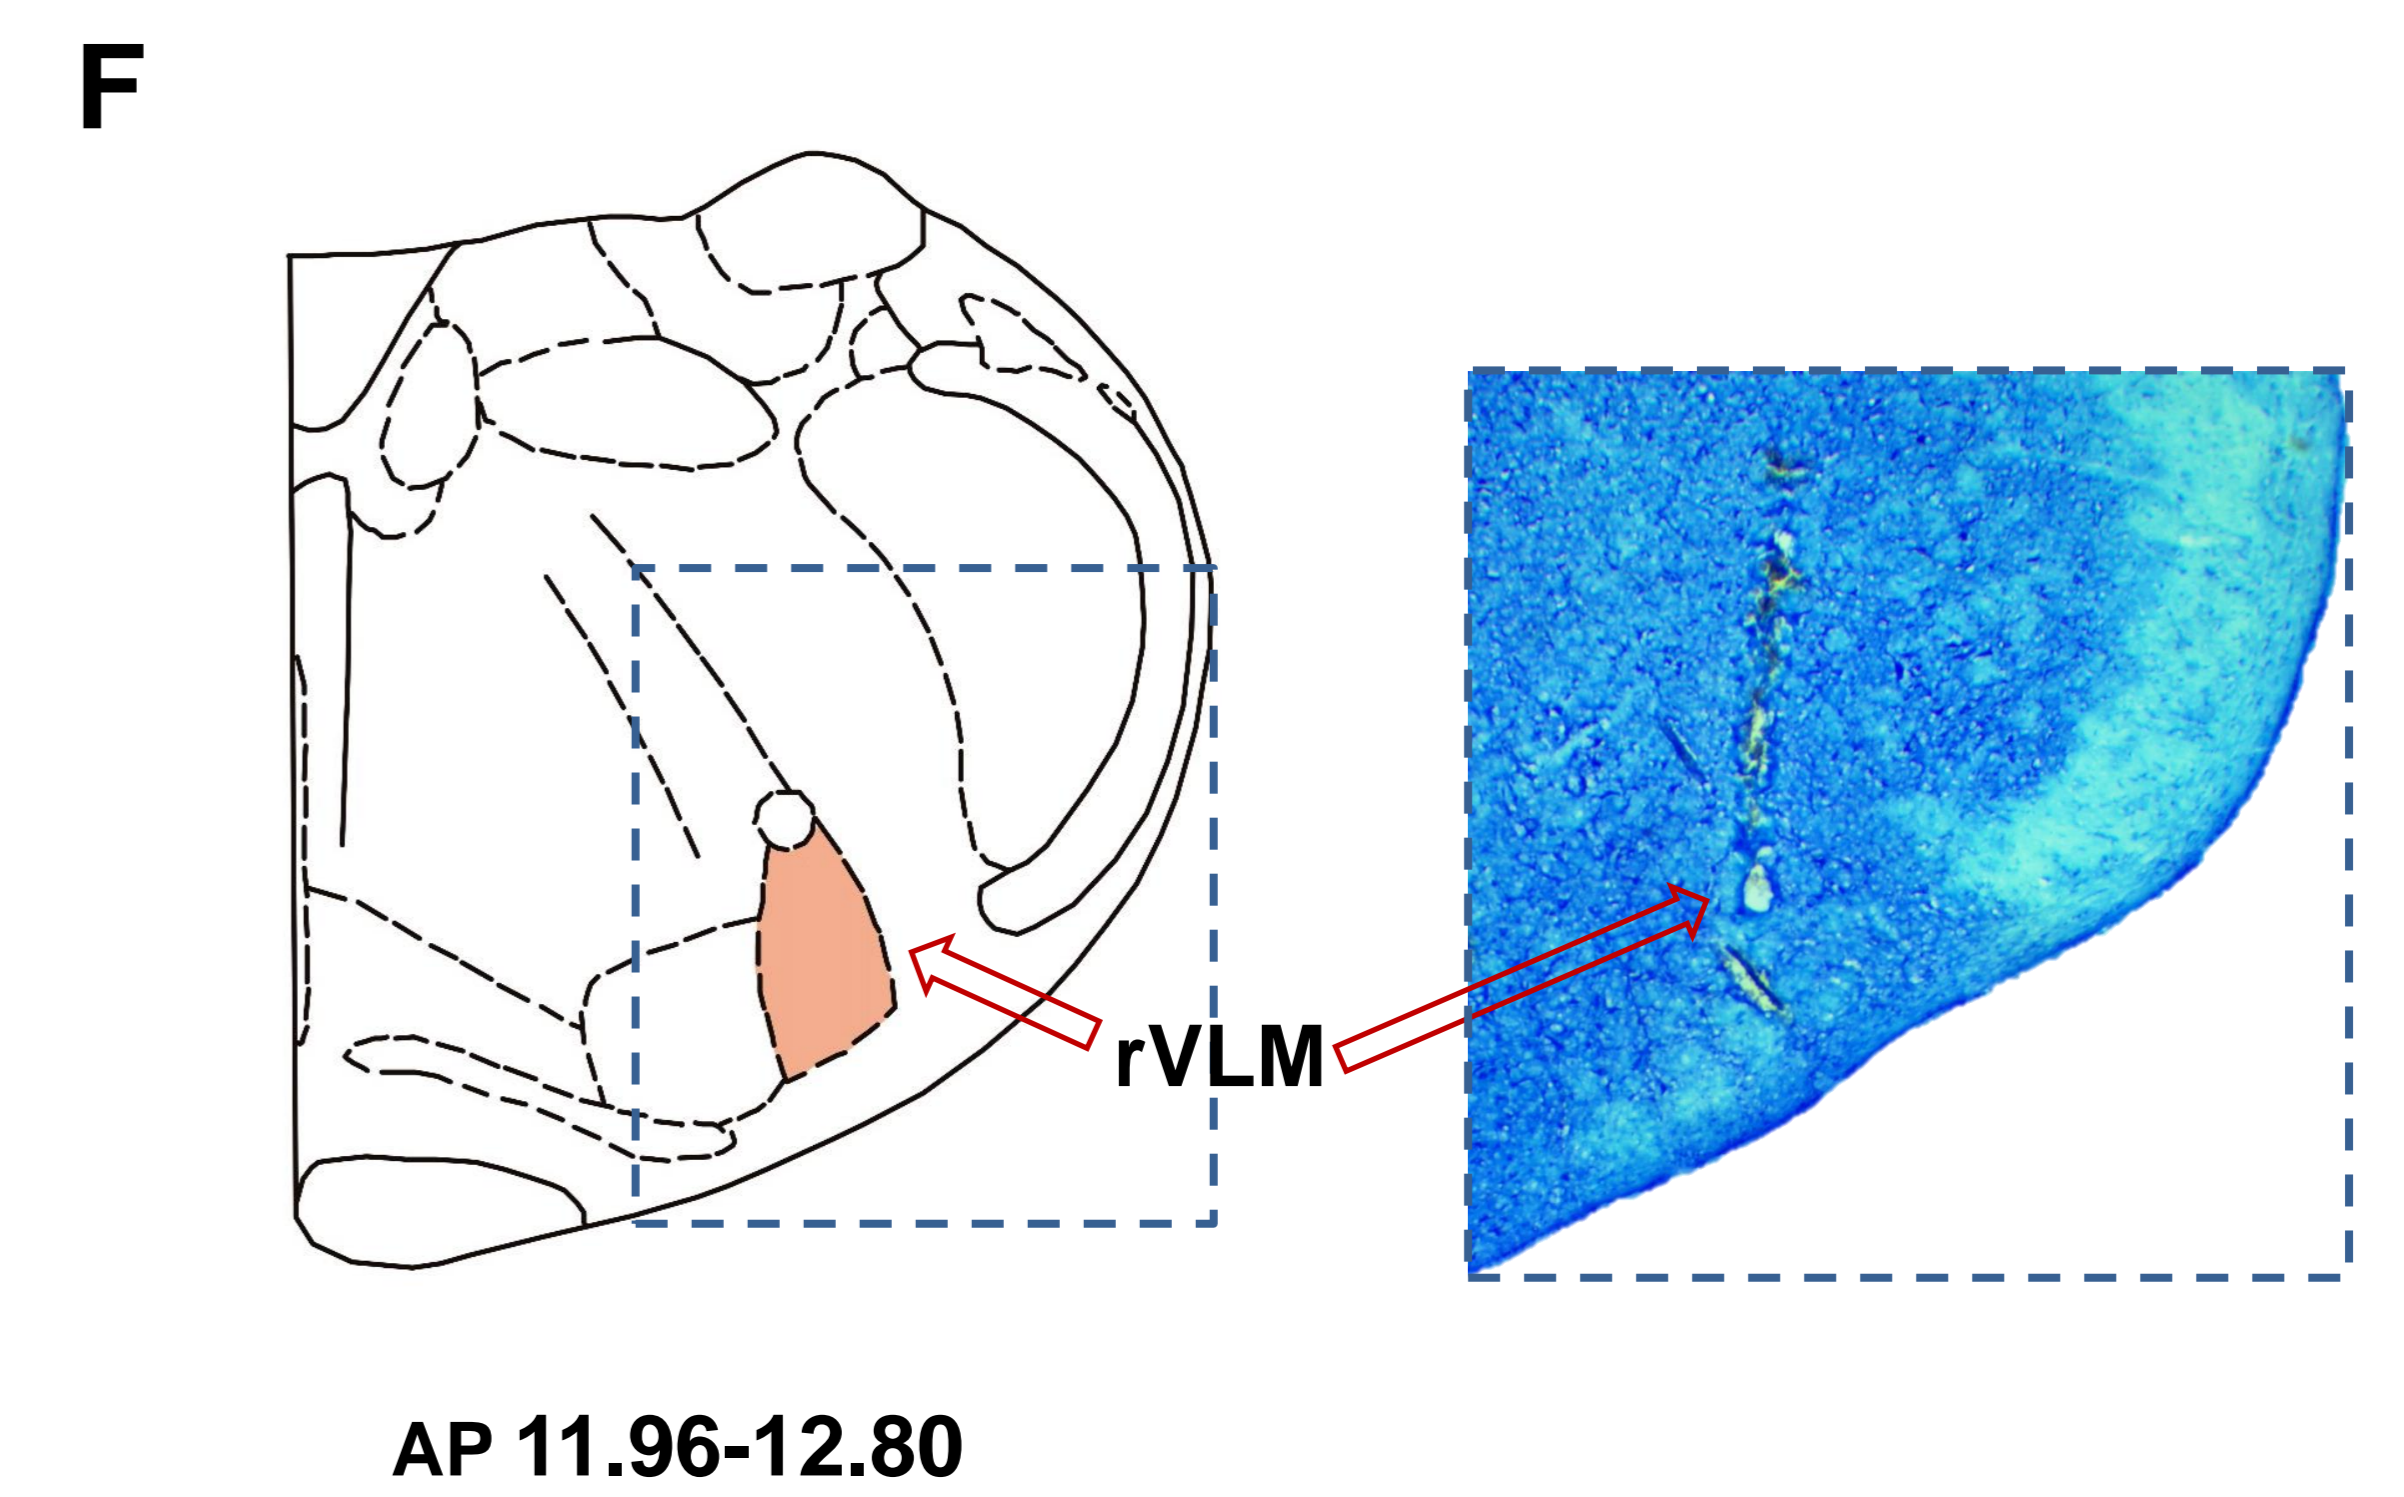

**Fig.6**

**Saline Group (n=11)**

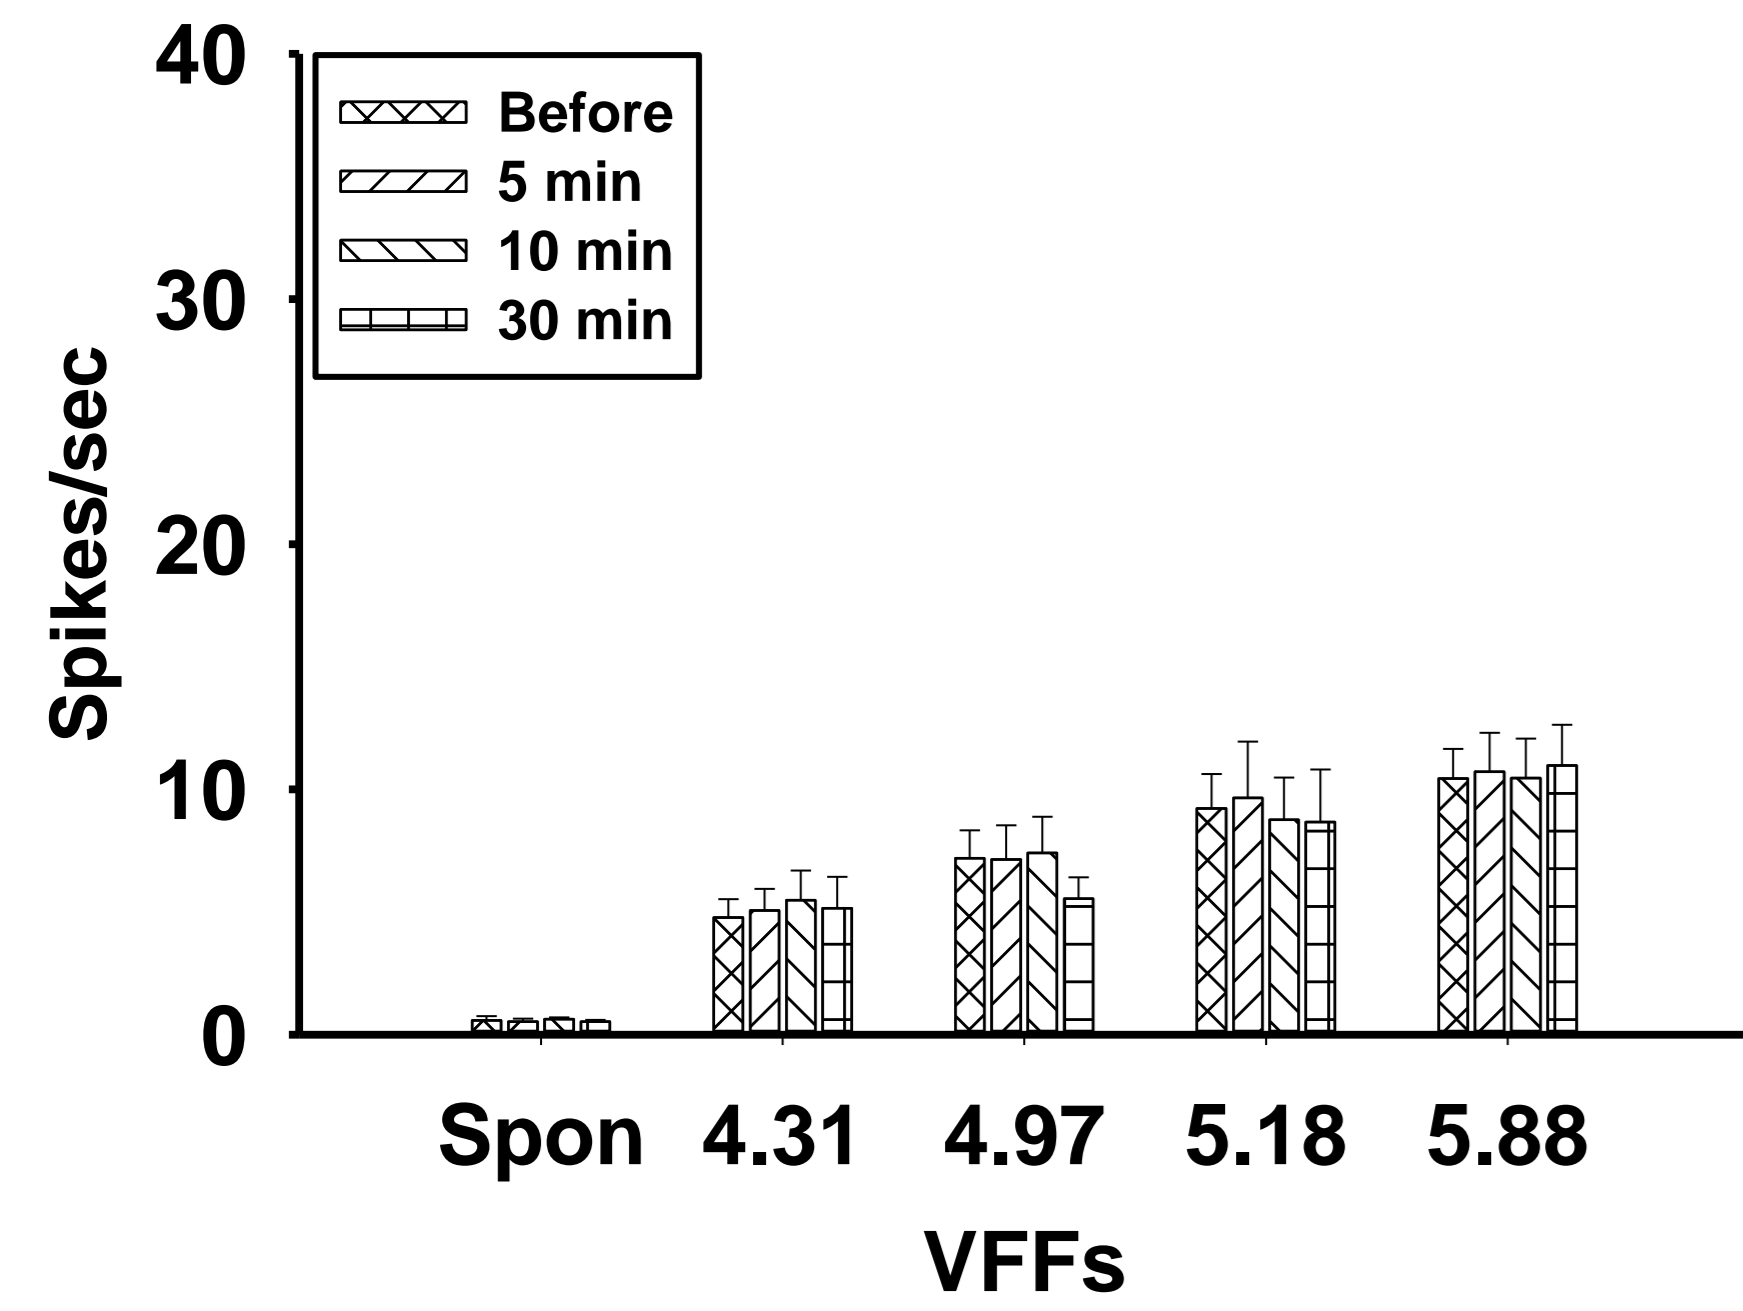

**SP Group (n=9)**

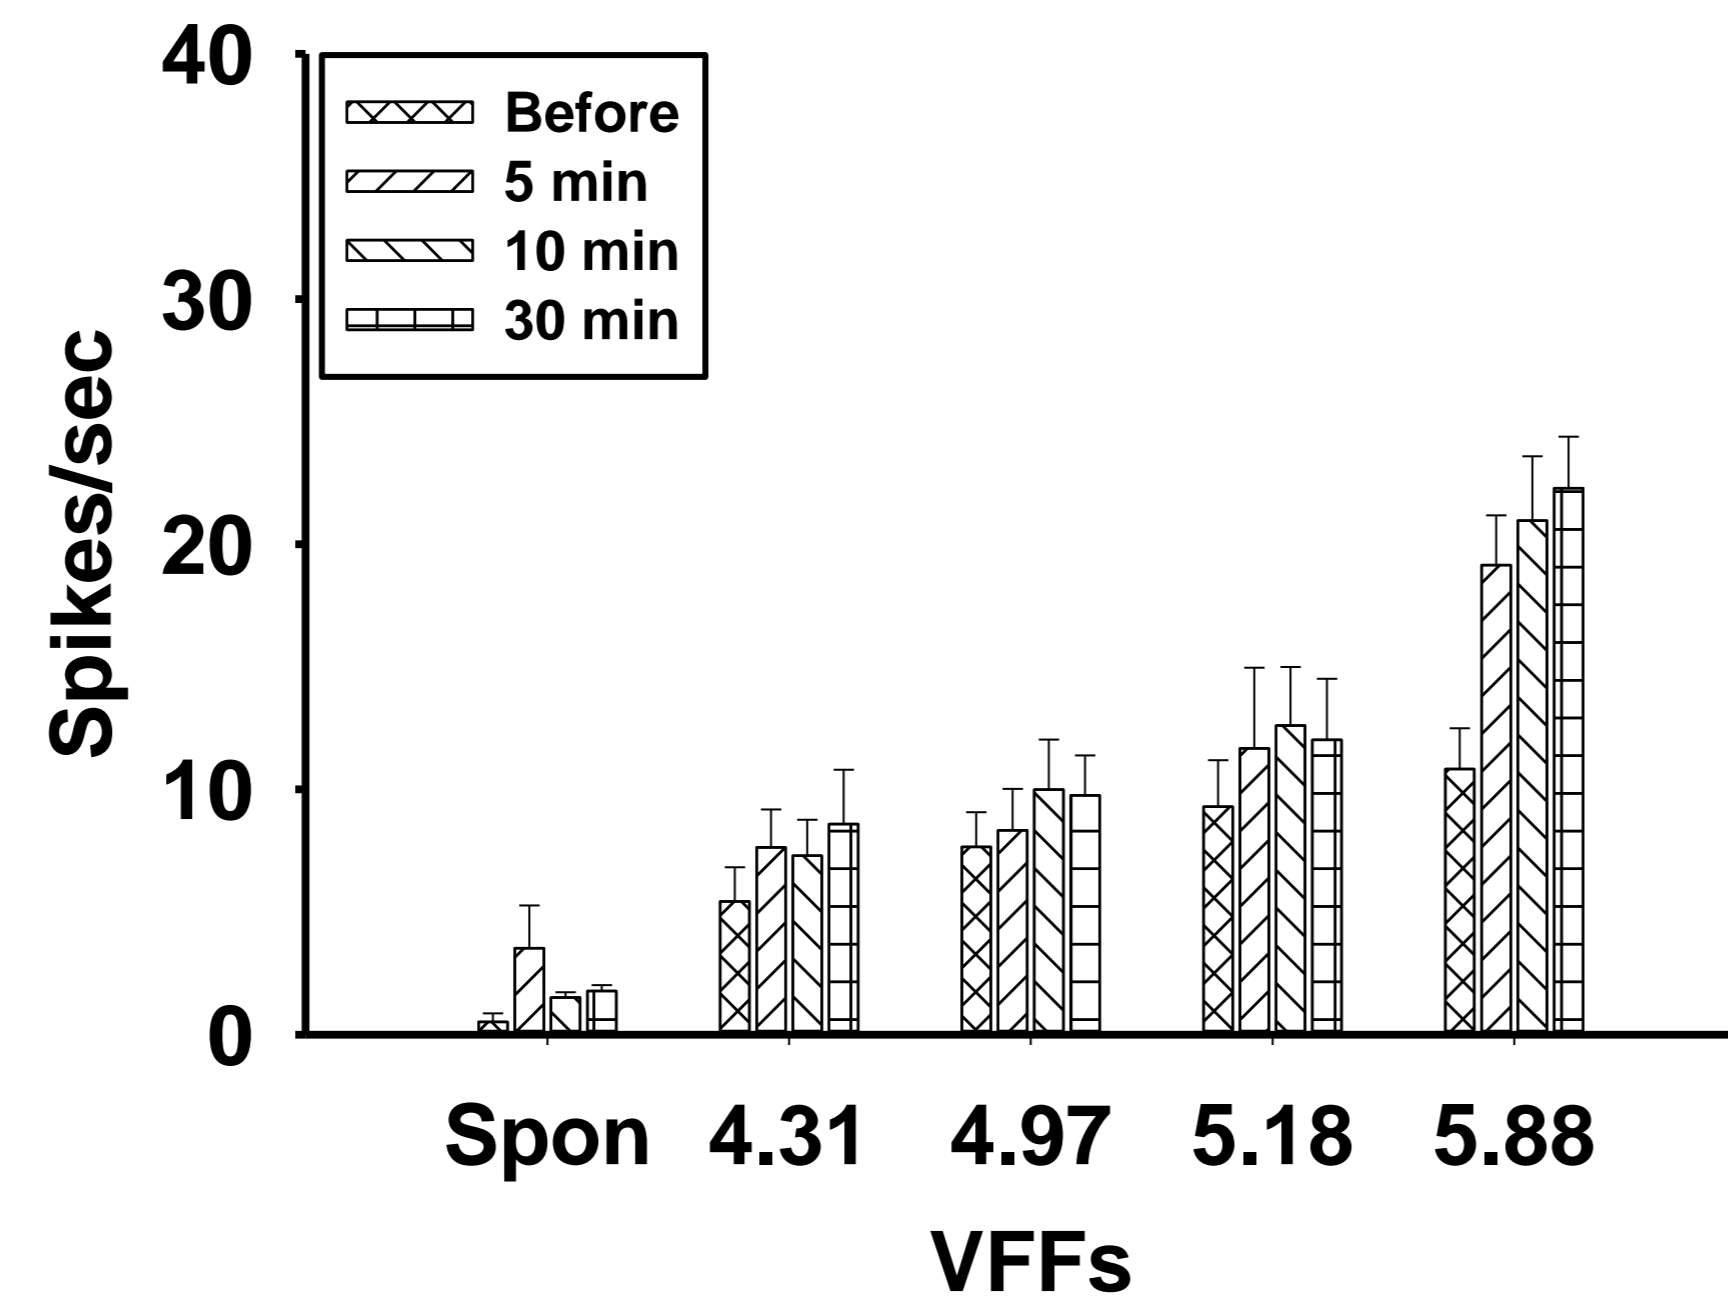

**Hyper-Saline Group (n=6)**

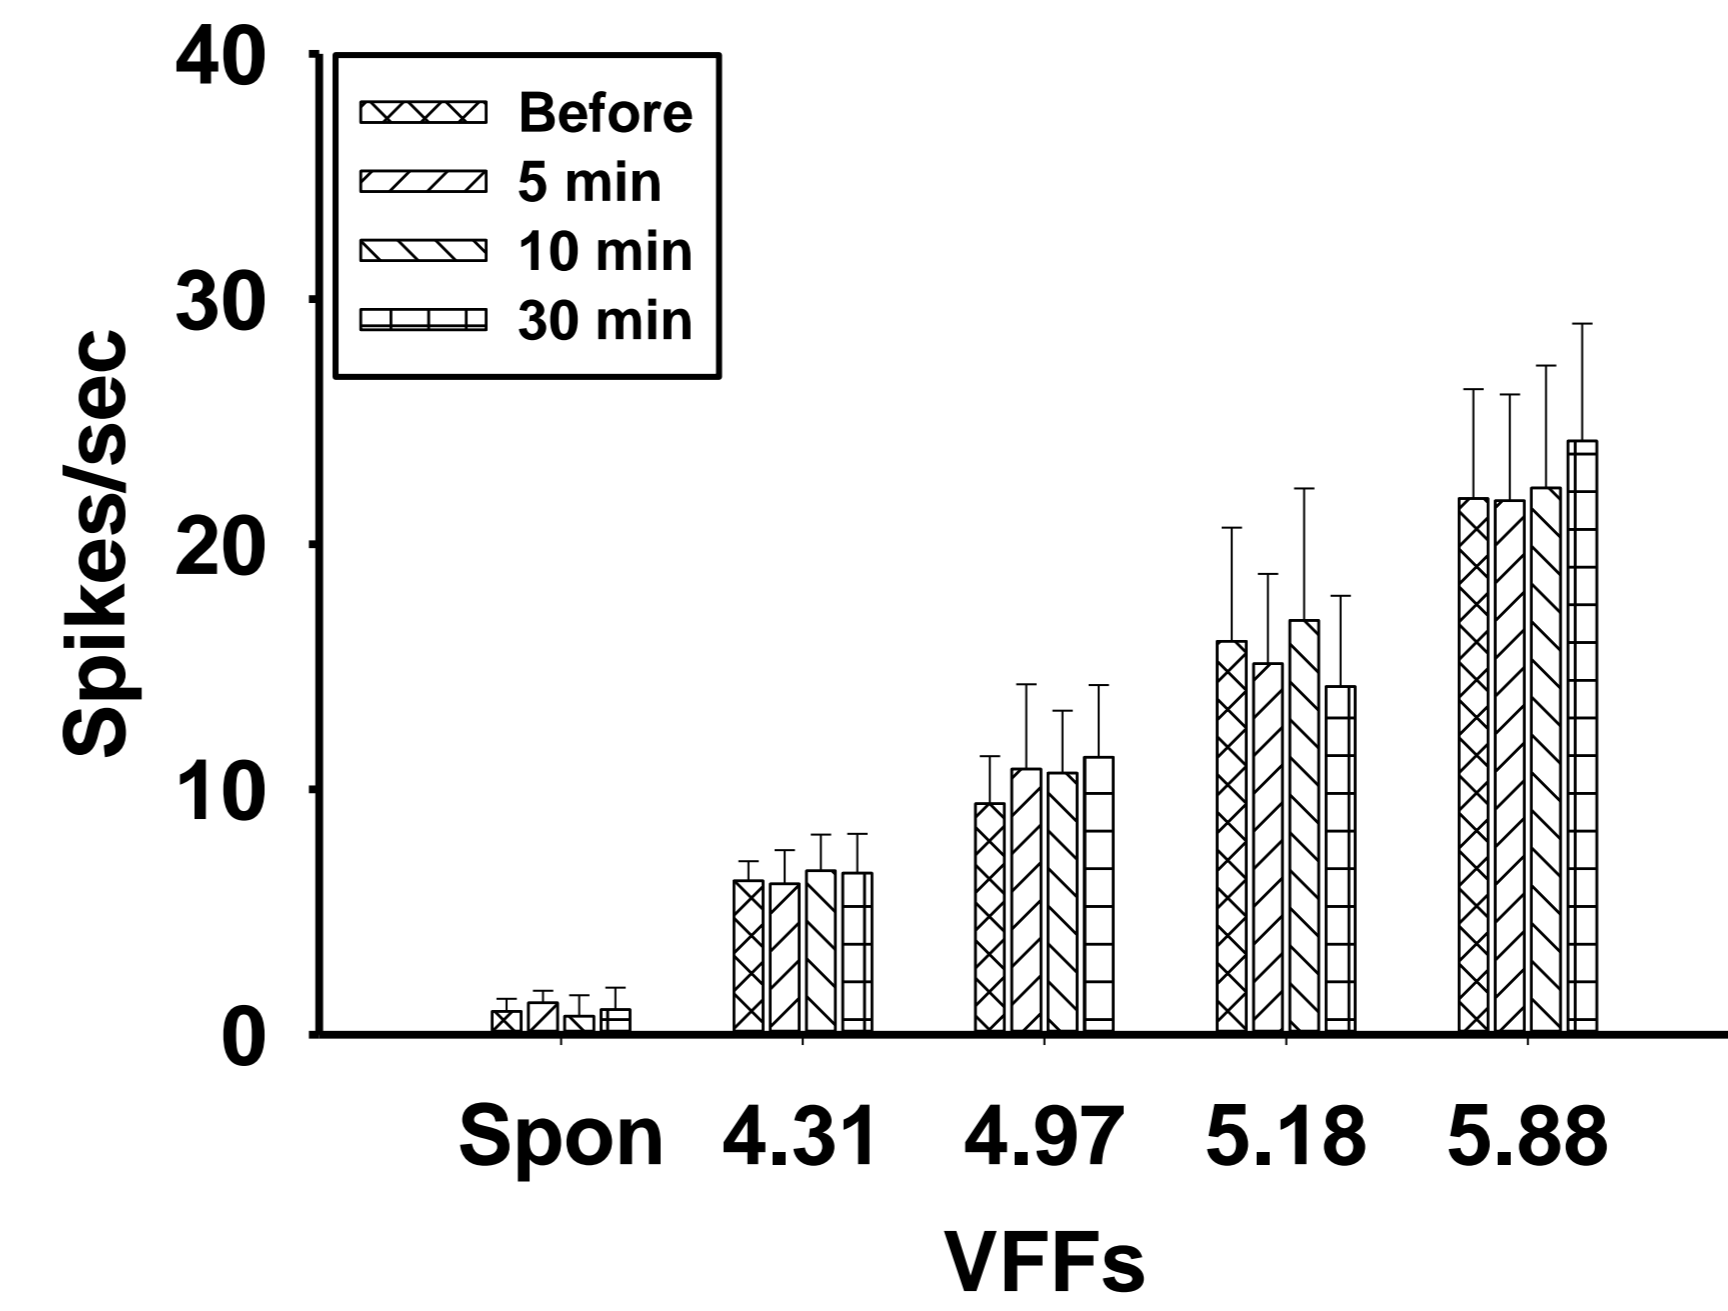

**Hyper-CP Group (n=8)**

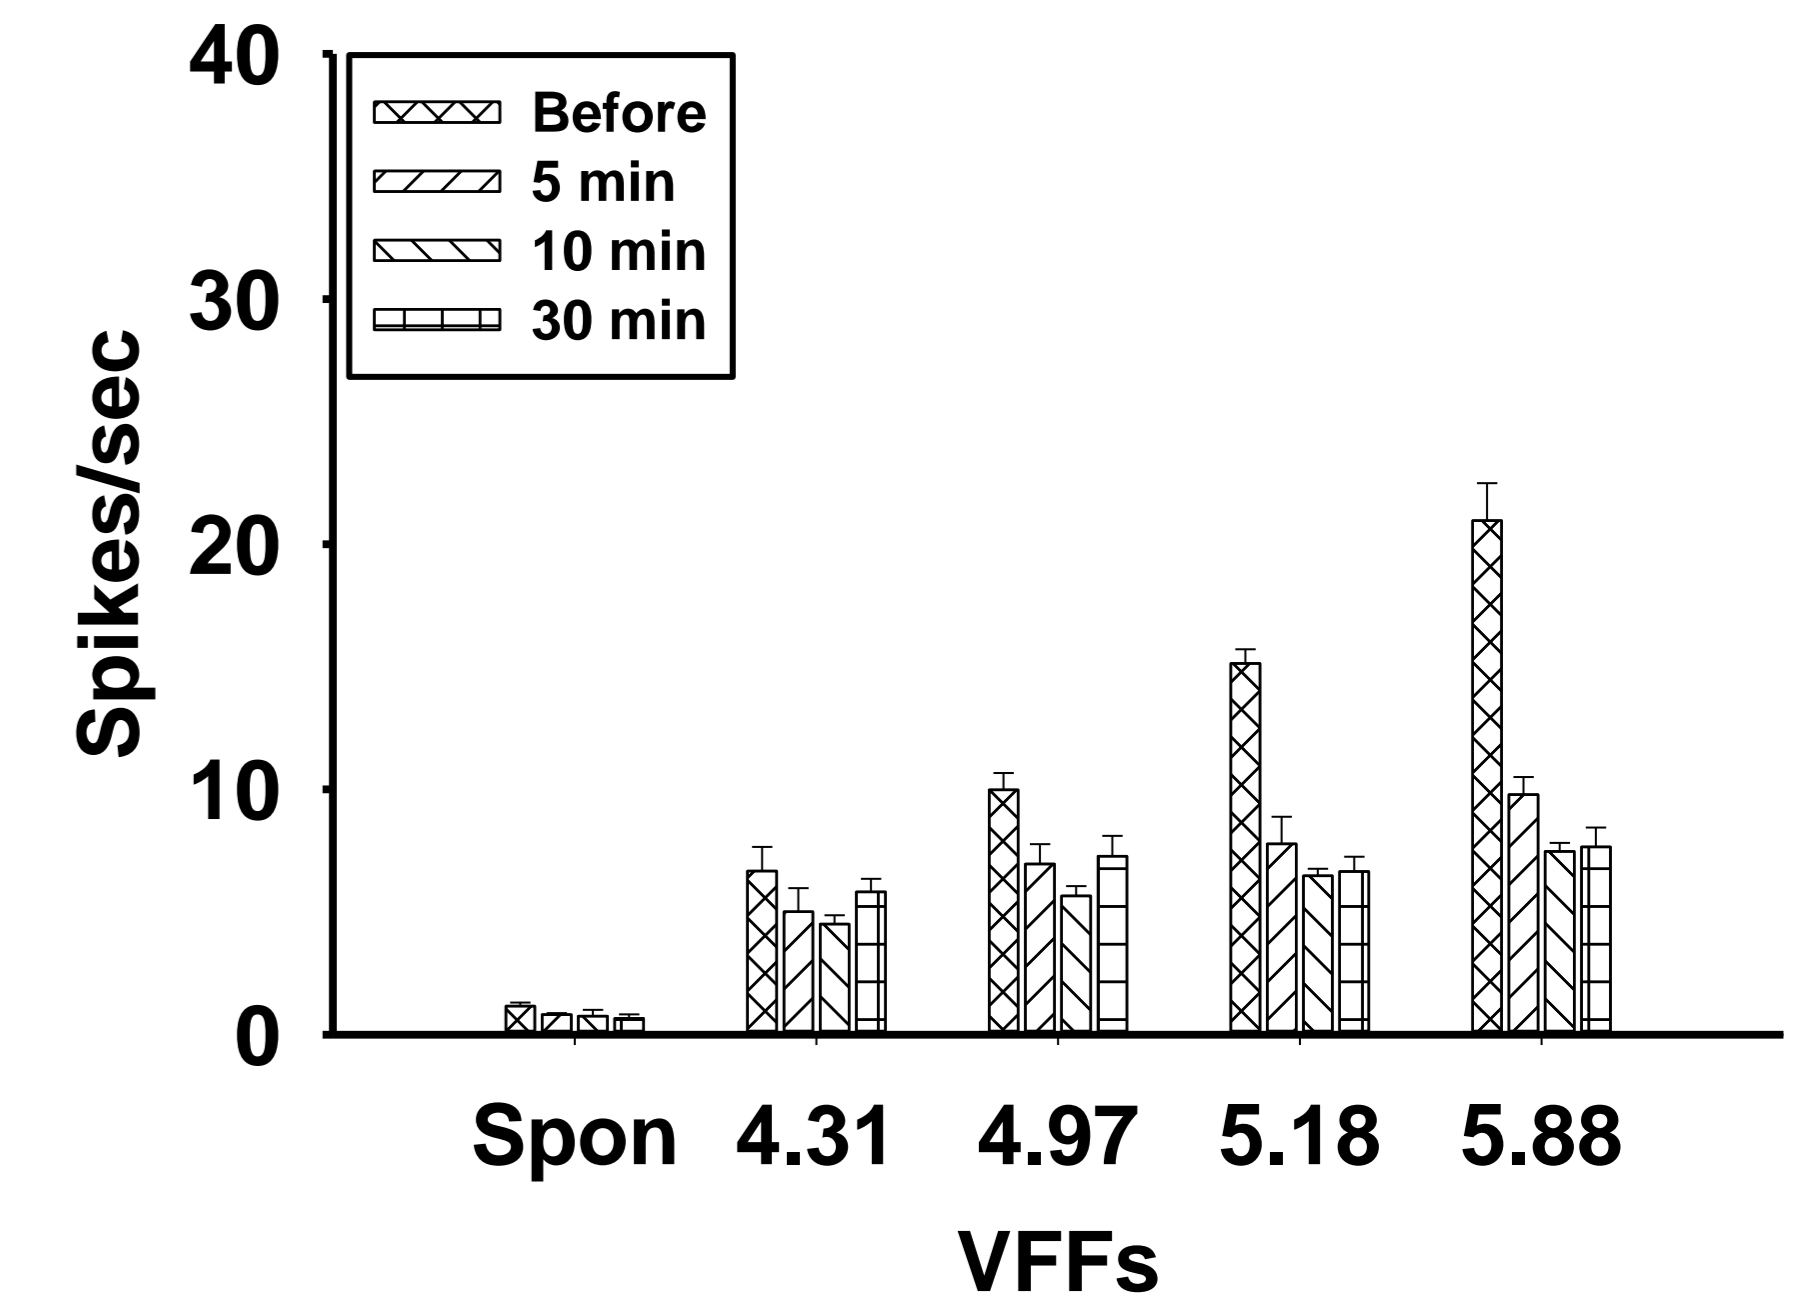

**Saline + Acup Group (n=6)**

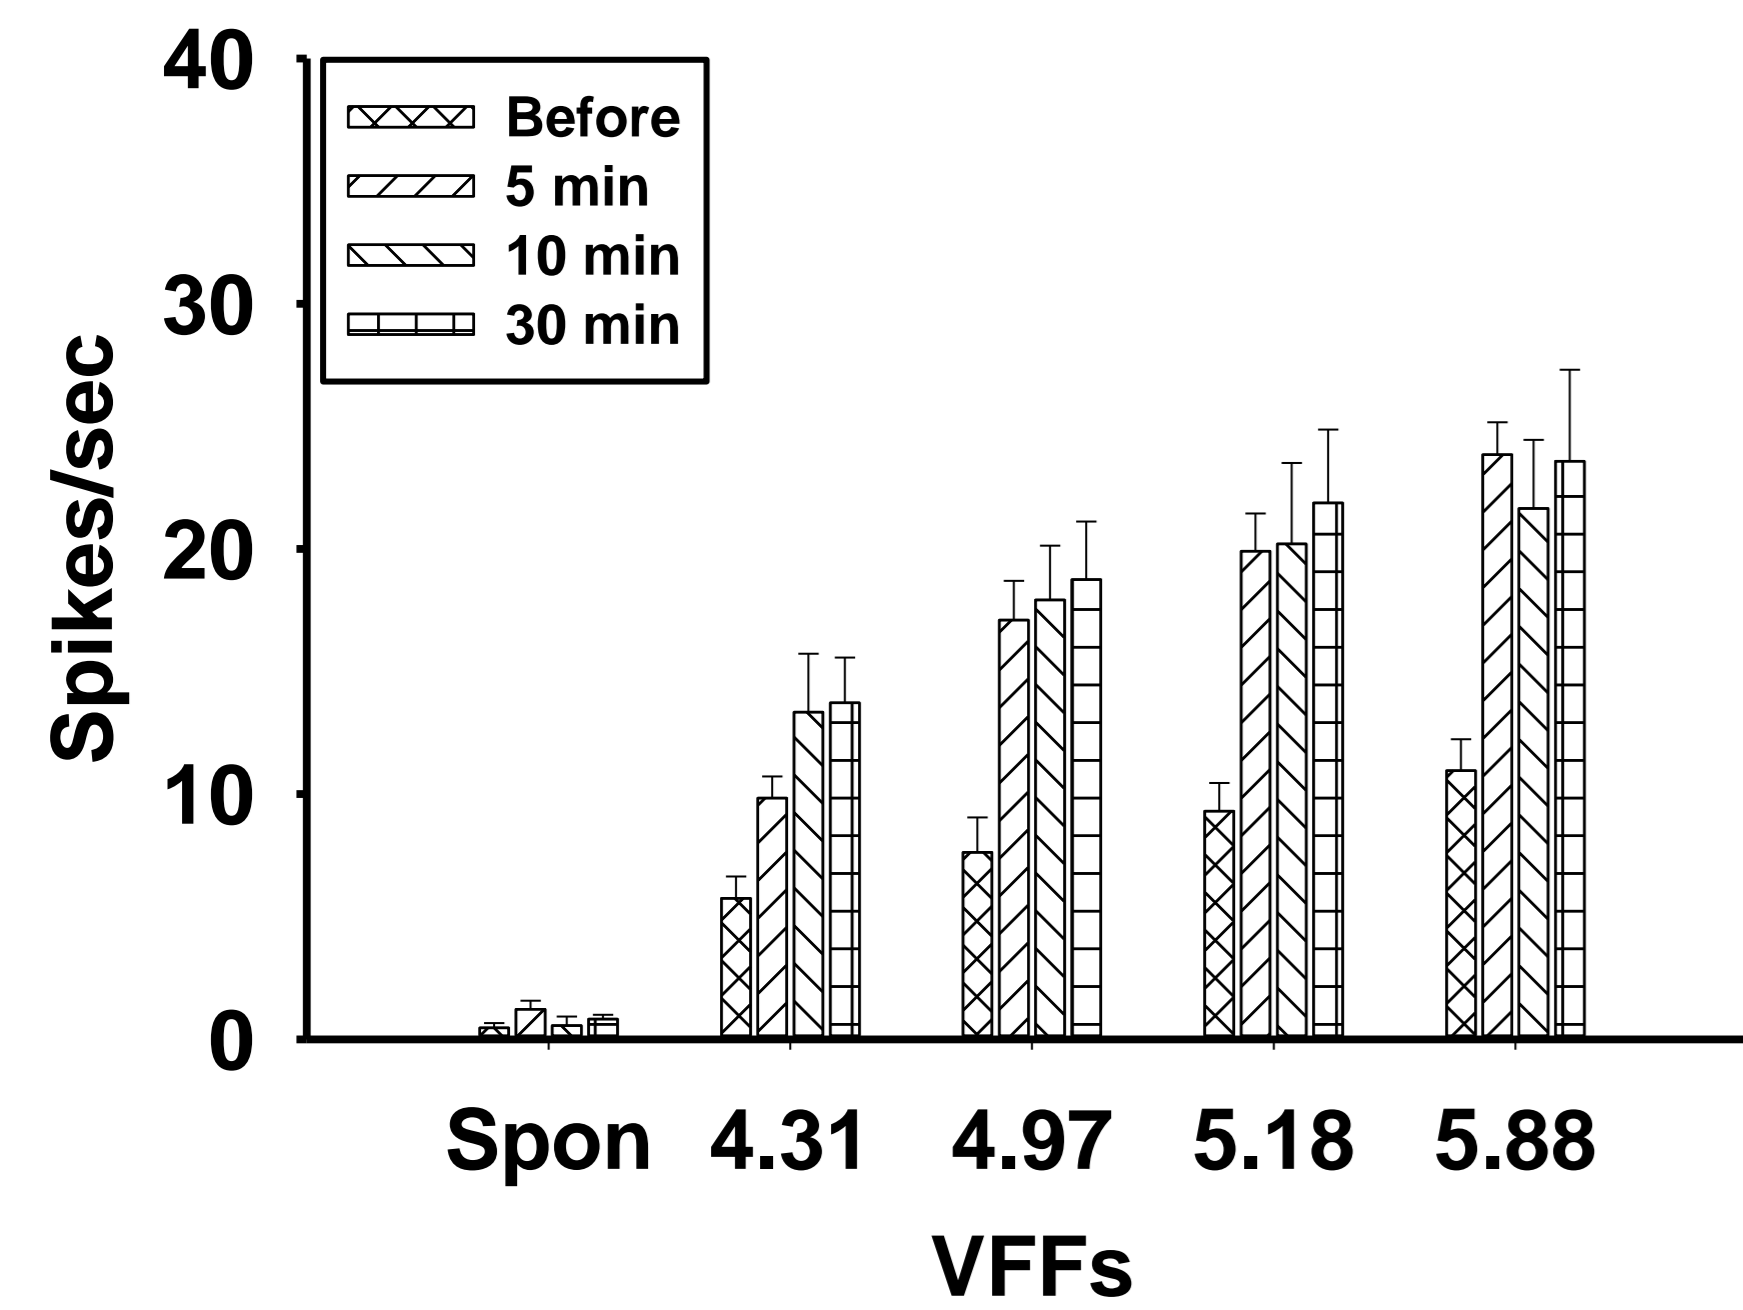

**CP + Acup Group (n=7)**

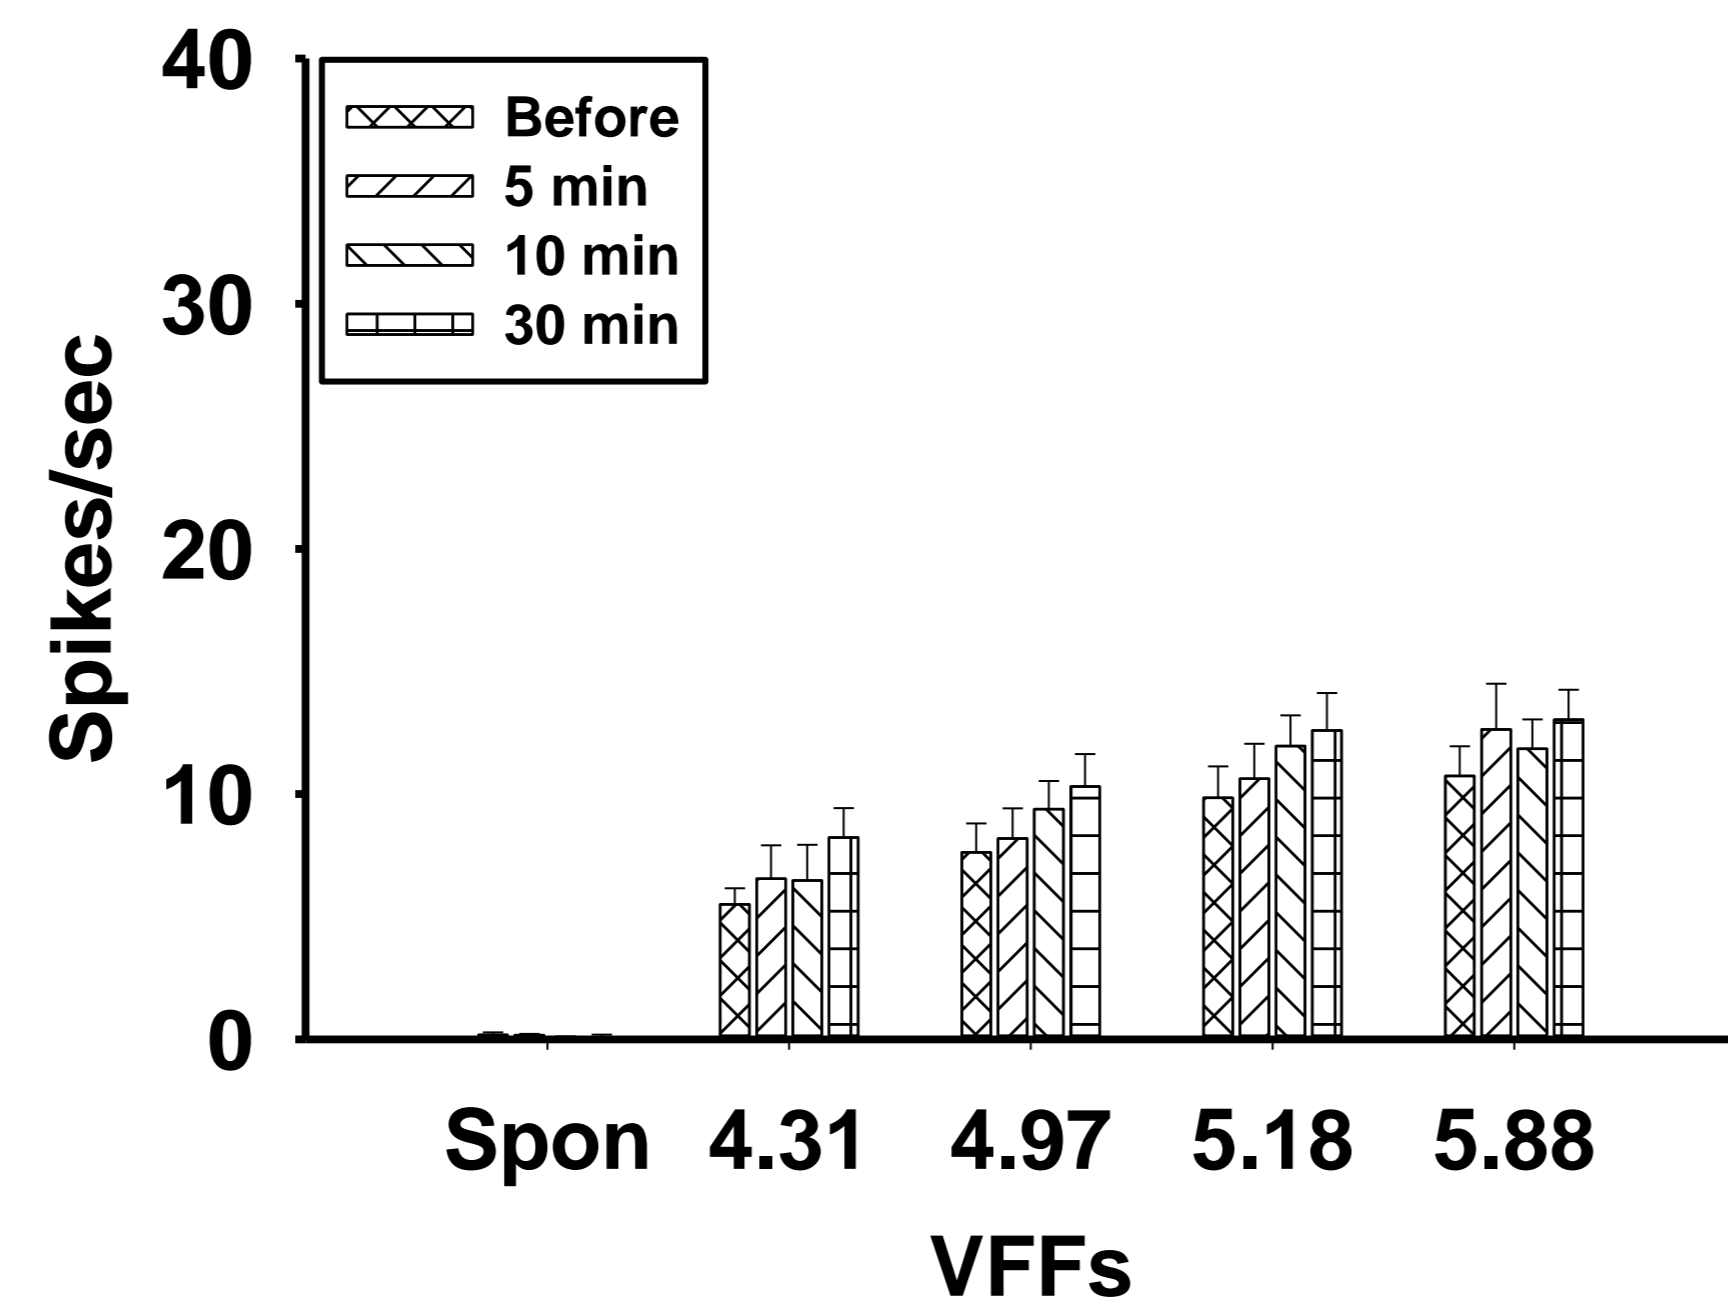

**Hyper-Acup Group (n=6)**

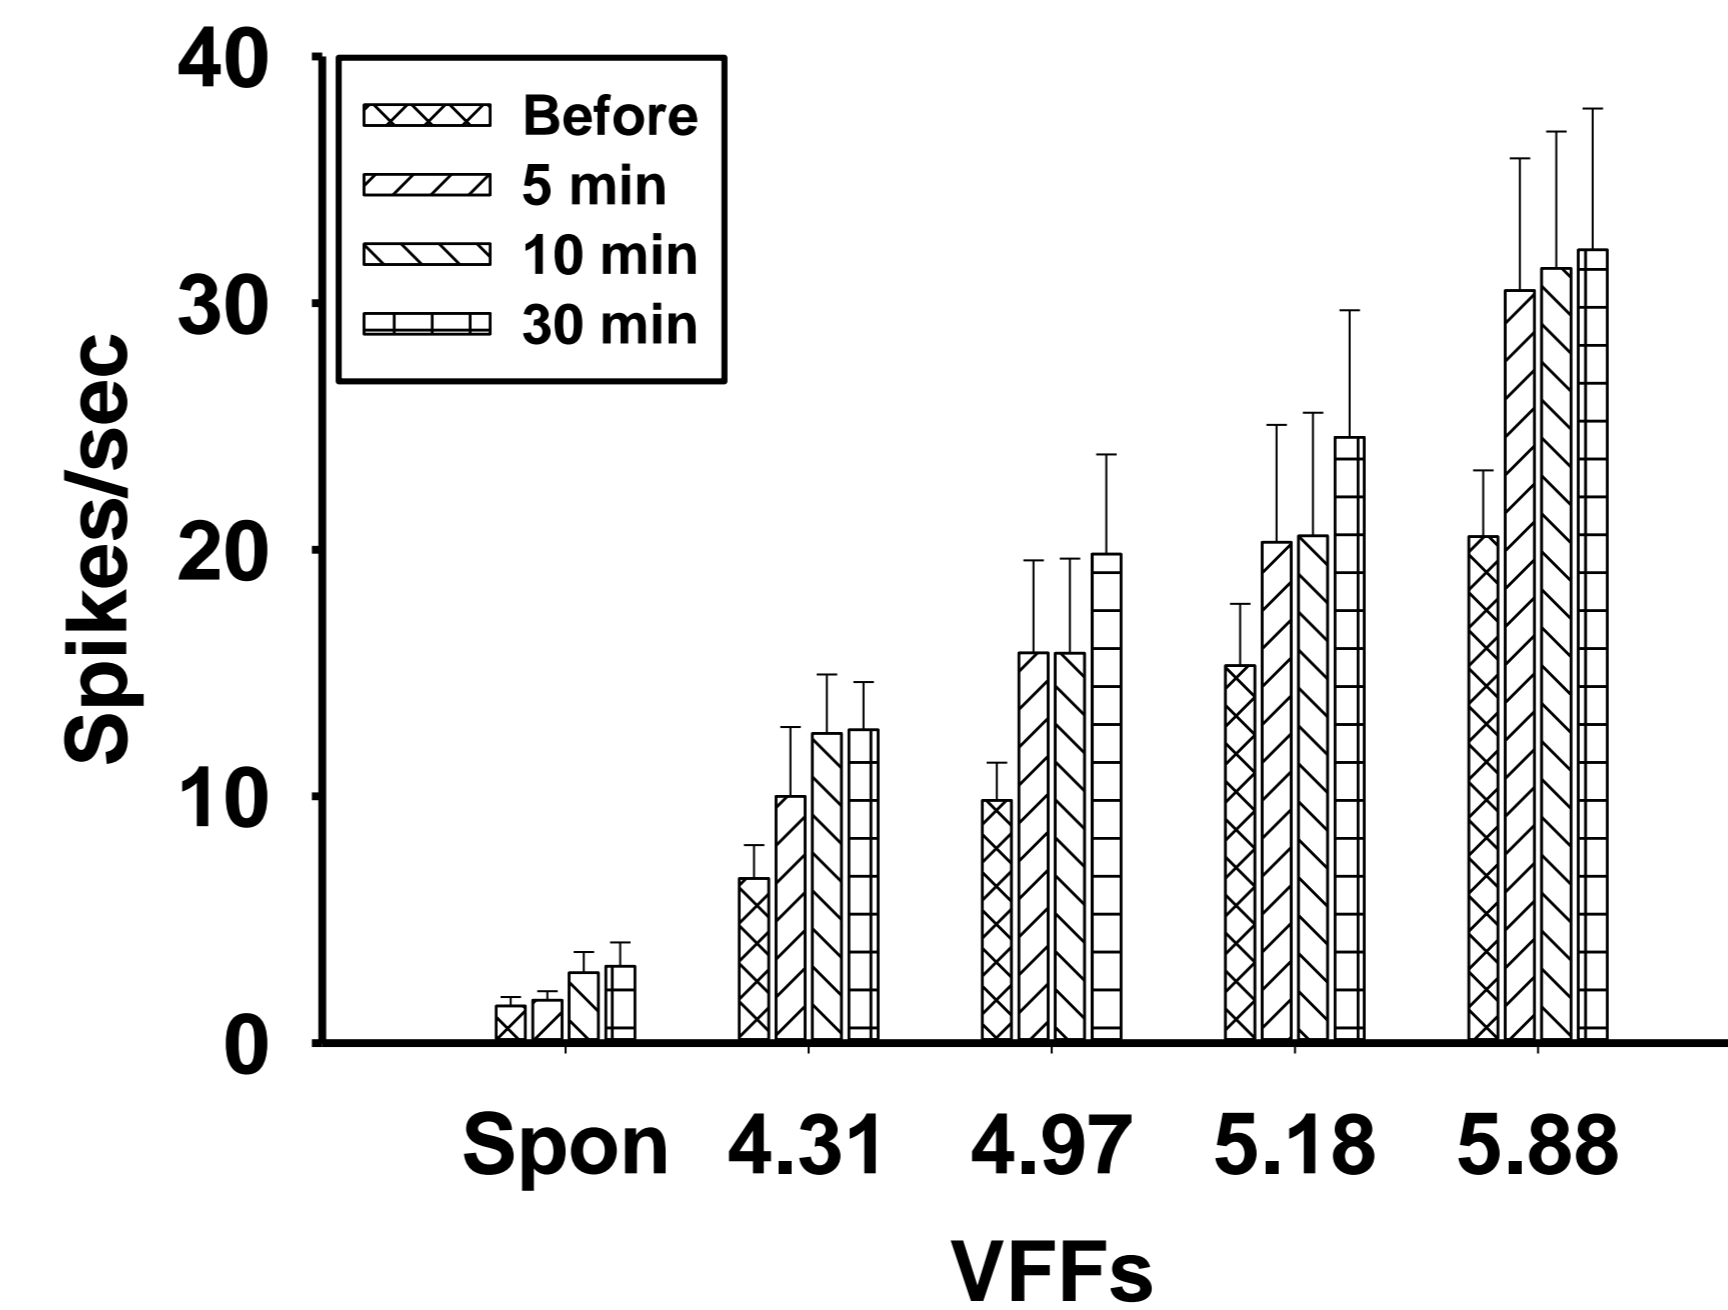

**Hyper-CP + Acup Group (n=6)**

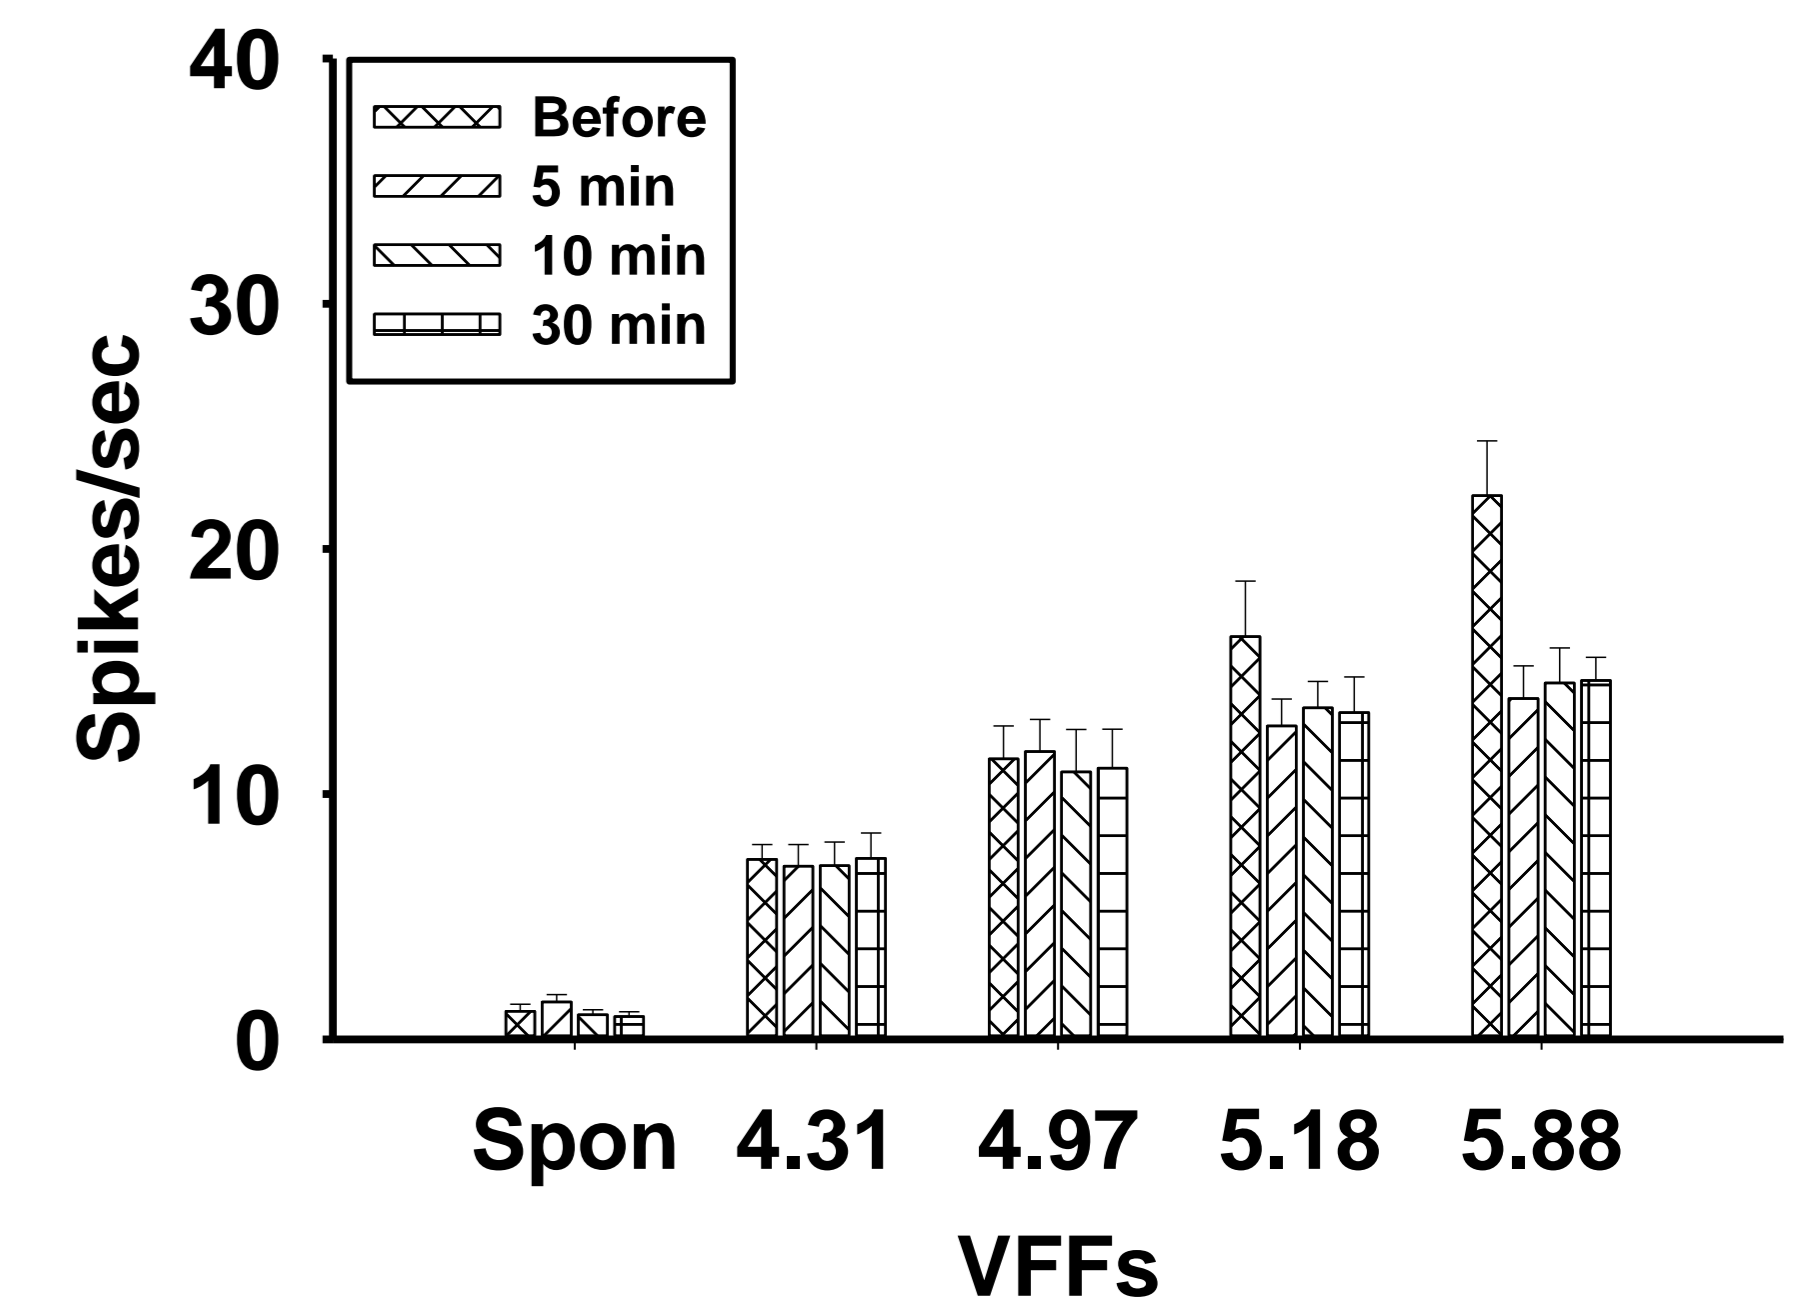

**Supplementary Fig. 1**

**A**

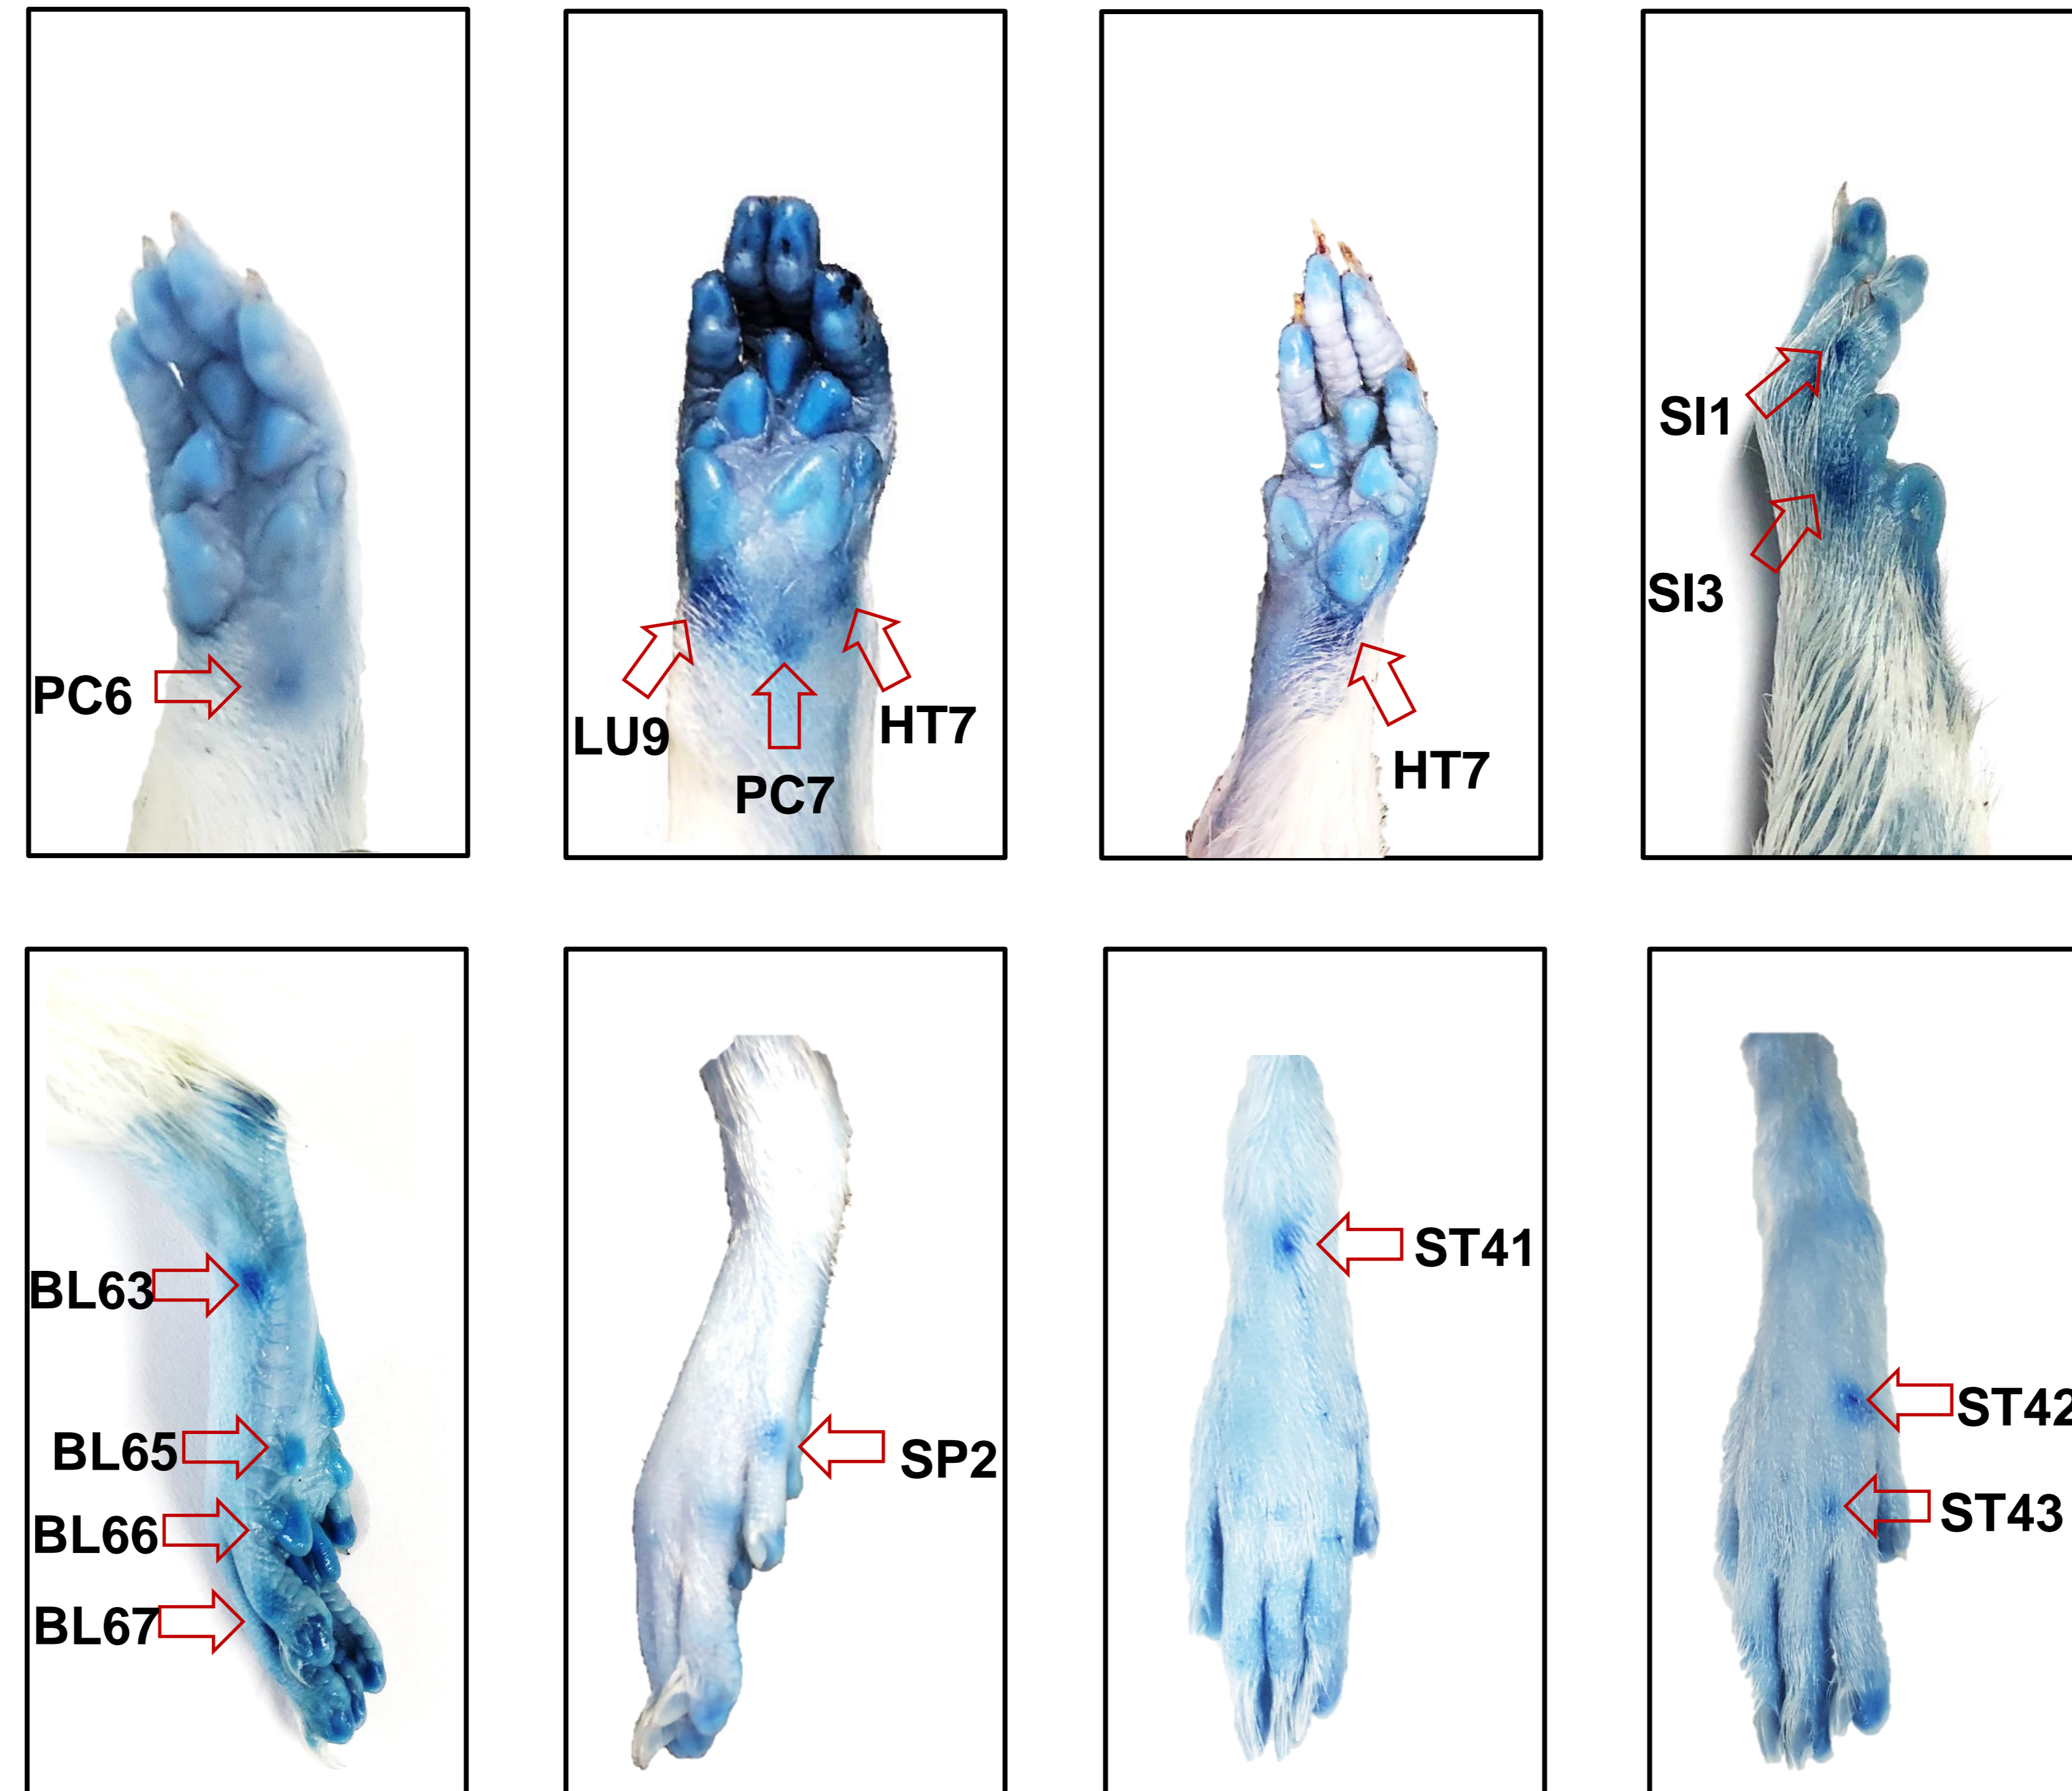

**Supplementary Fig. 2**



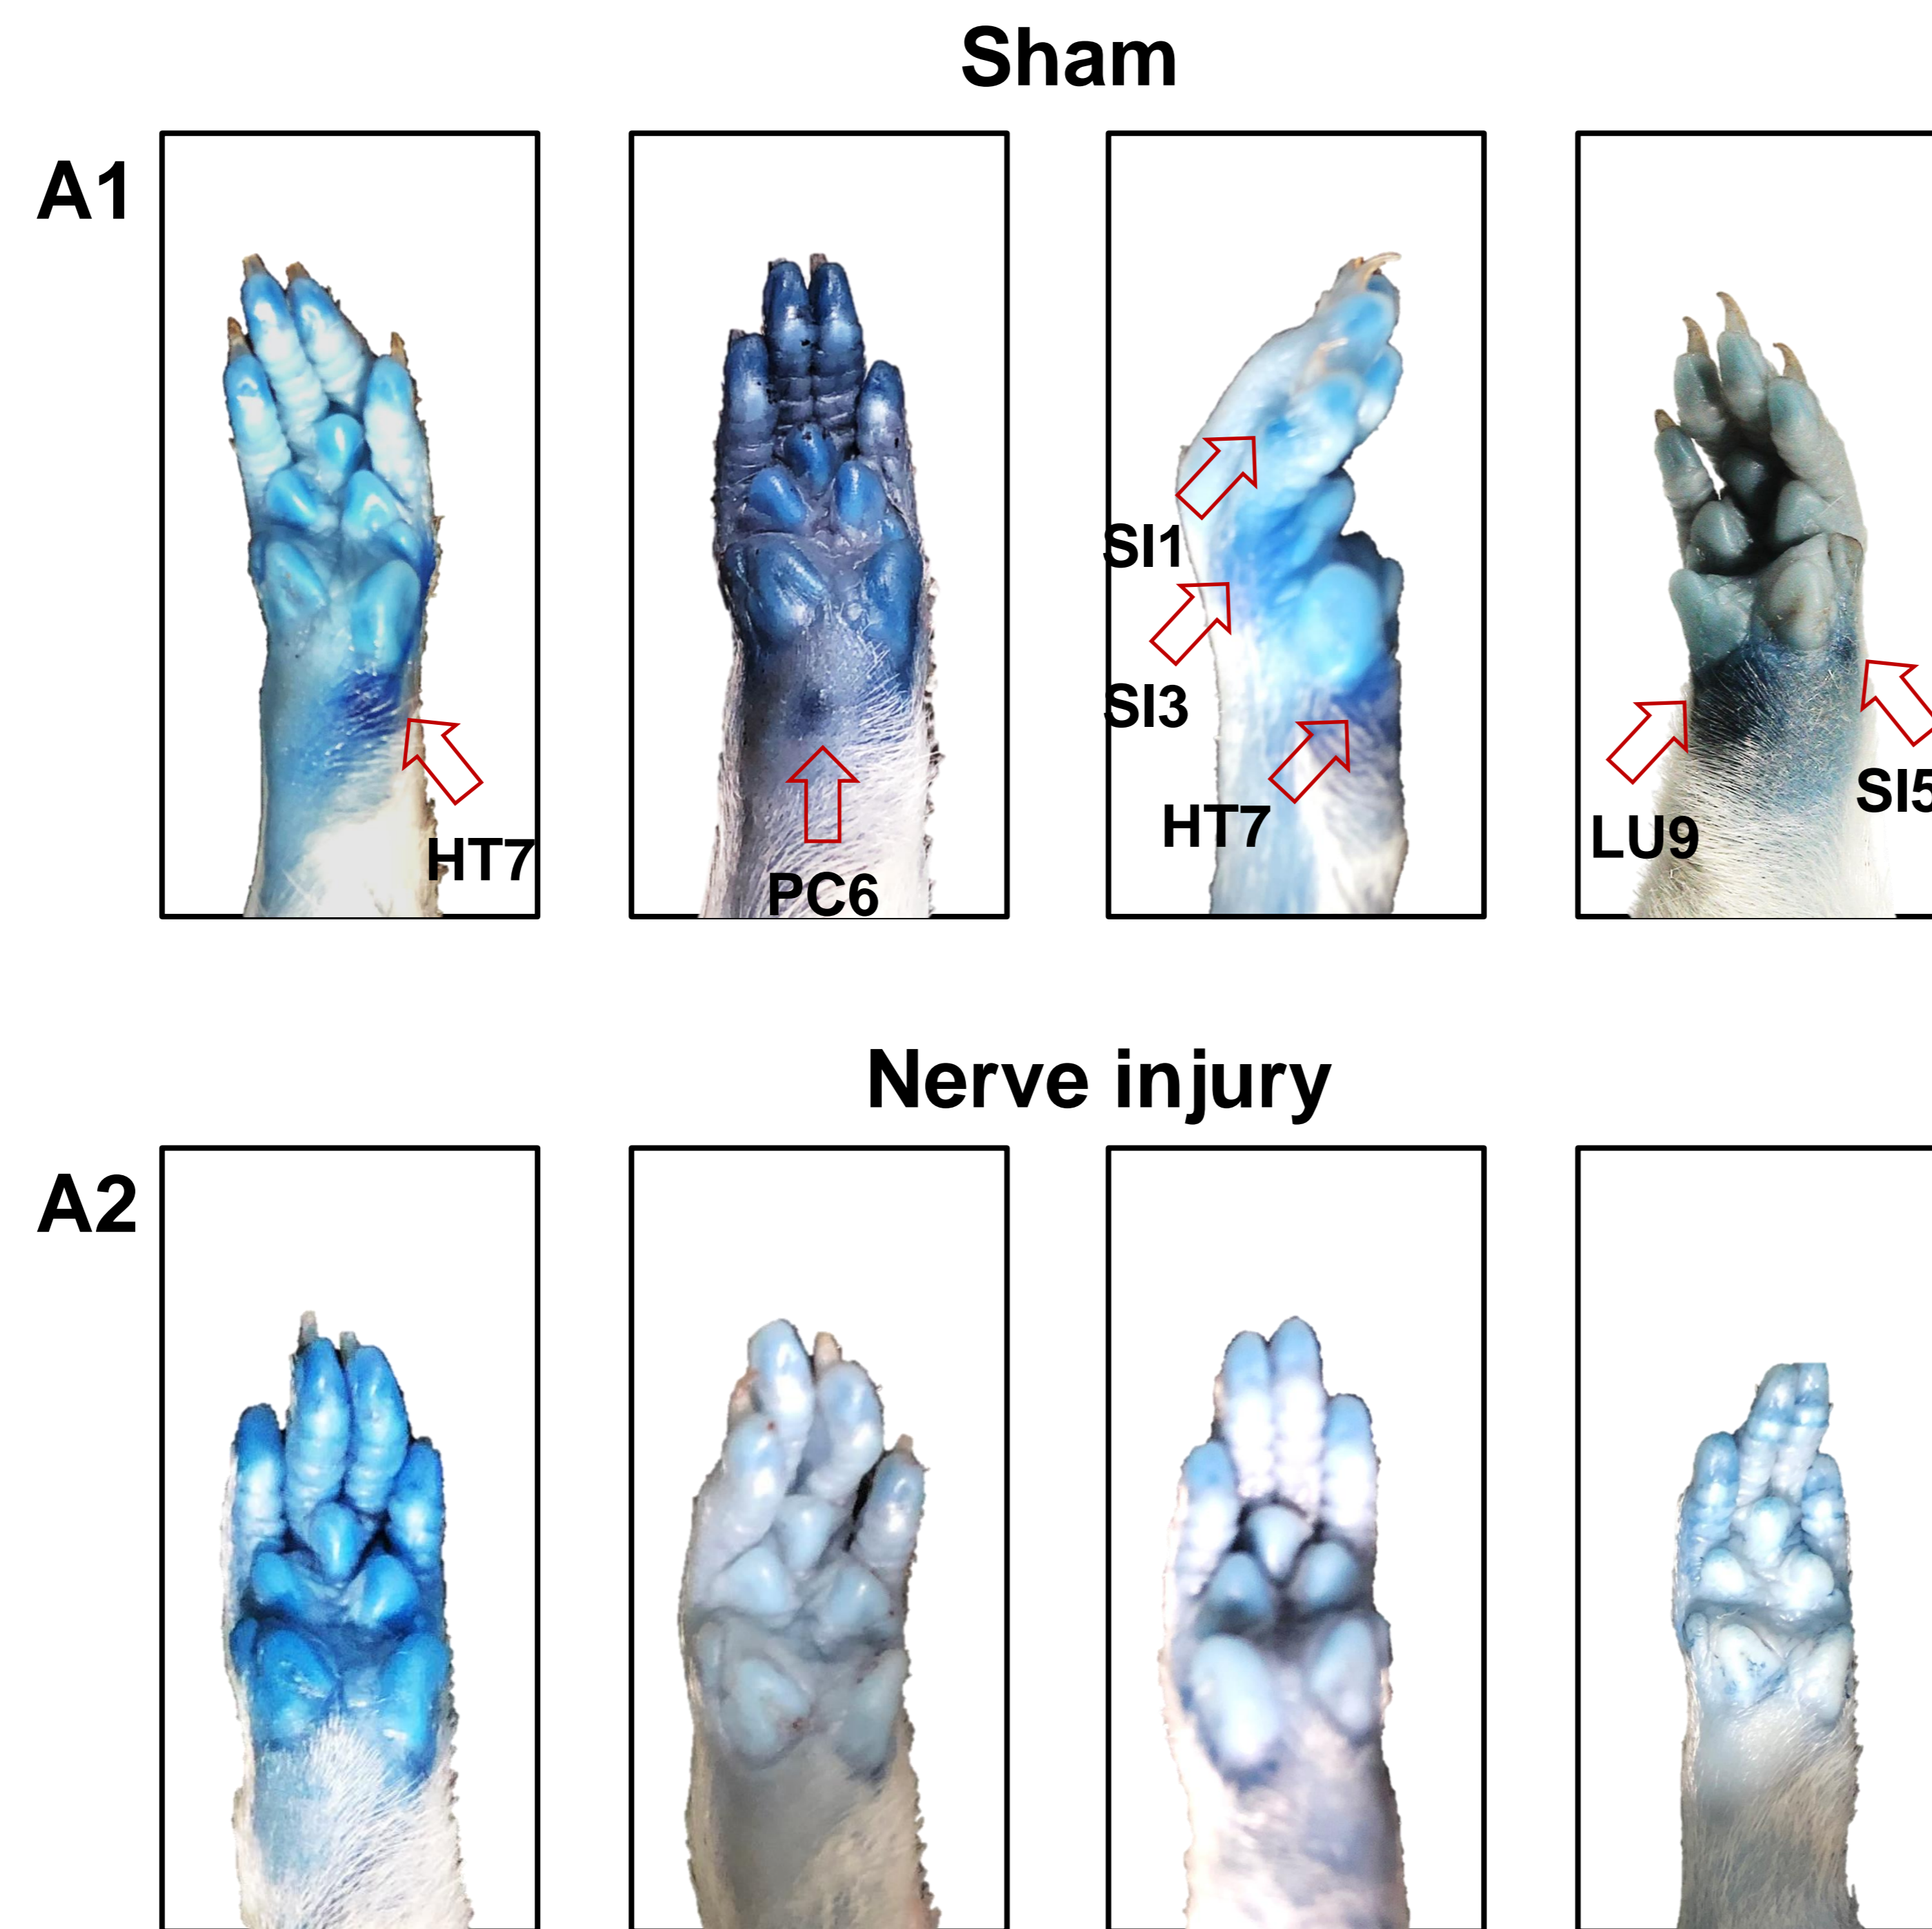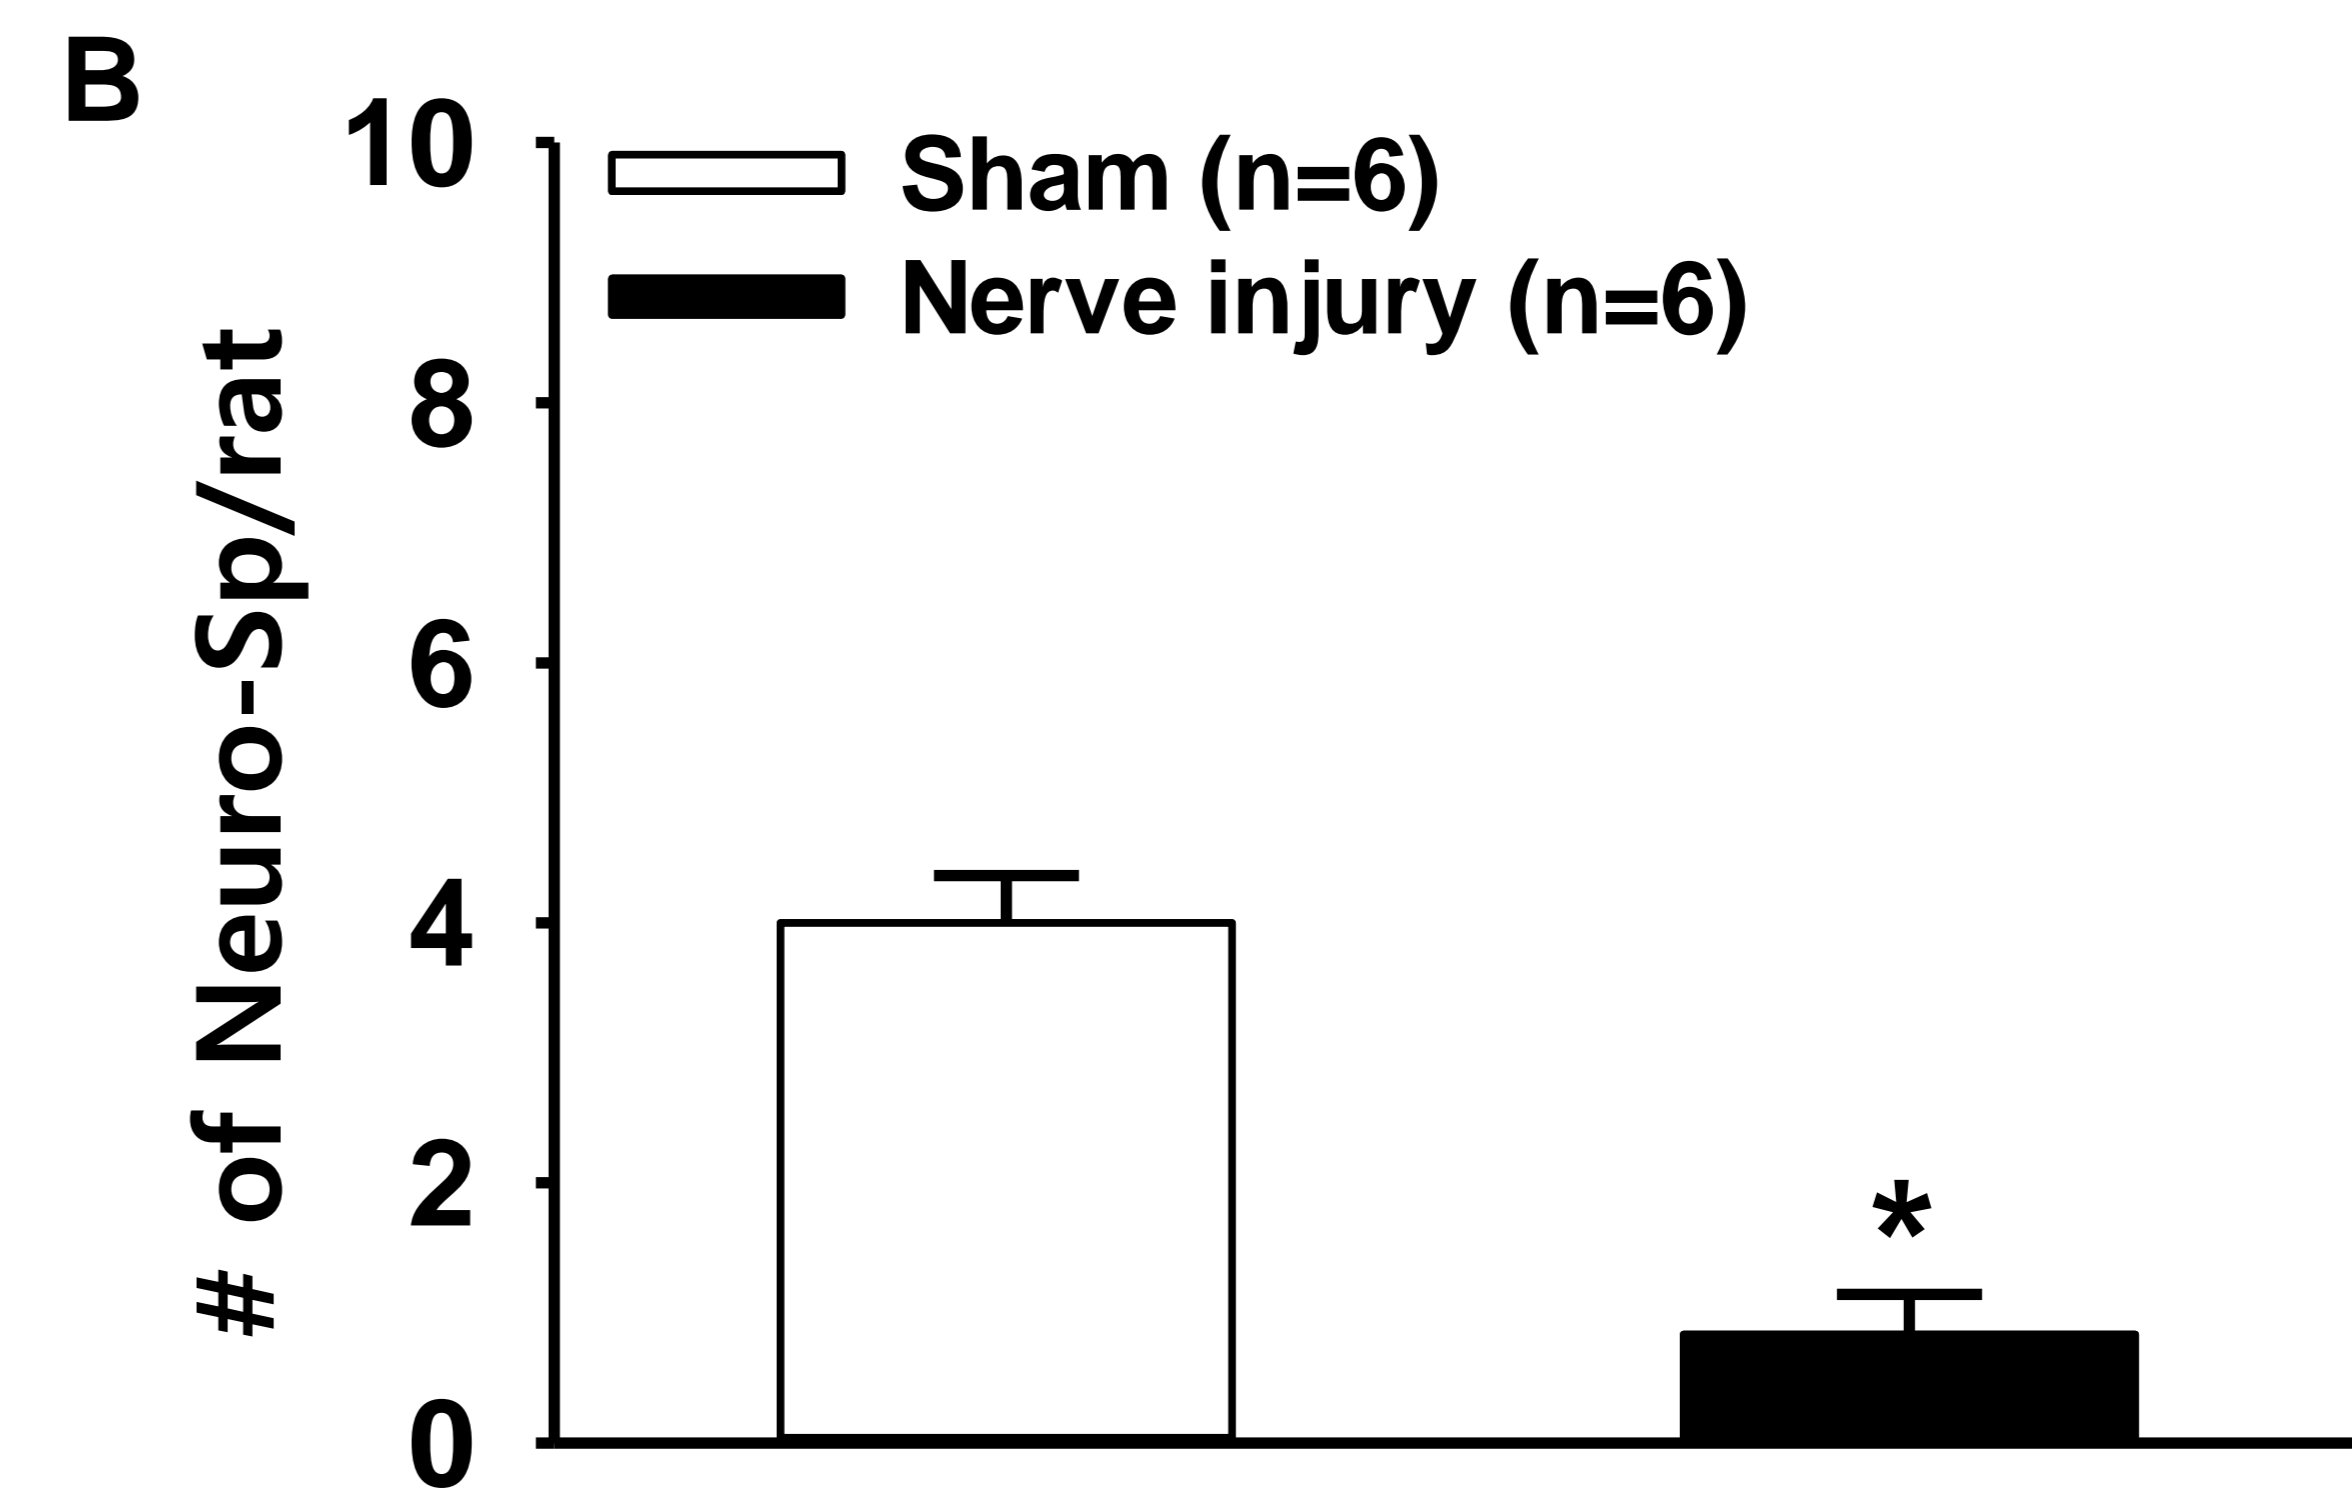

Supplementary Fig. 3

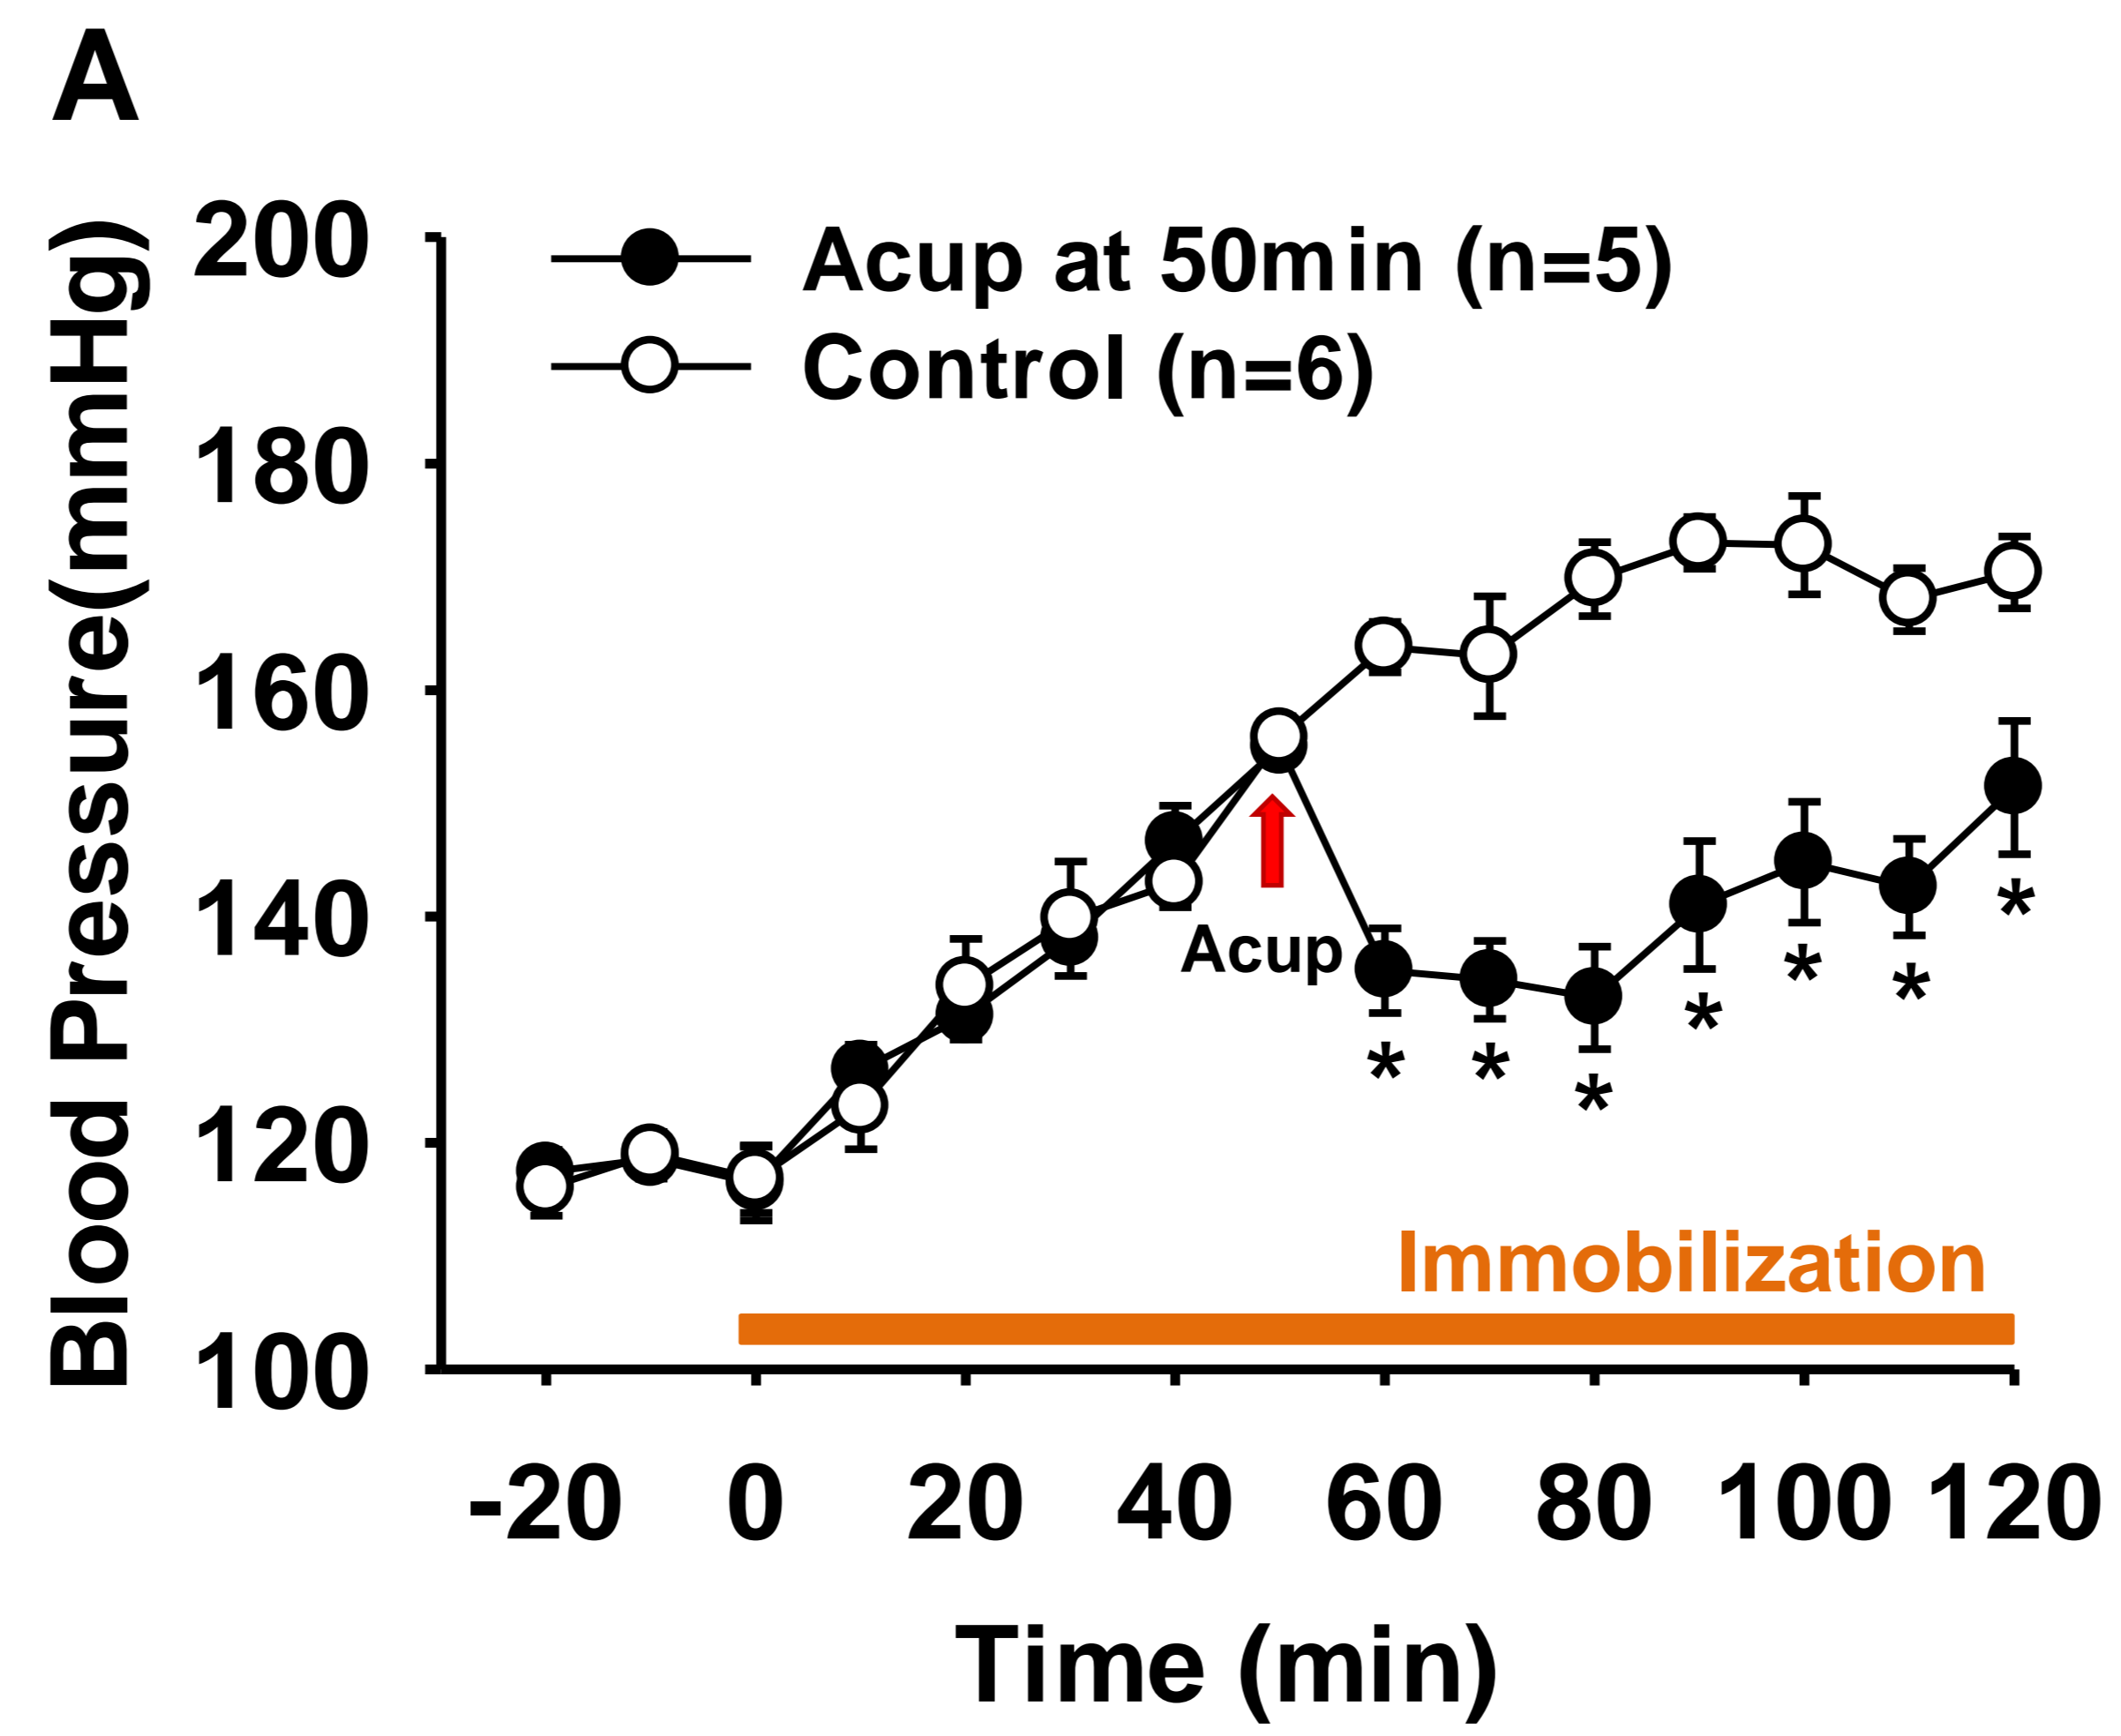

Supplementary Fig. 4
